# Supplementary material for: Influence of a 4′-substituent on the efficiency of flavonol-based fluorescent indicators of β-glycosidase activity
Source: Royal Society of Chemistry journal article supplement (doi:10.1039/d0ob01505a), 2020-01-01

## Supporting Information

for

### **Influence of the 4'-substituent on the efficiency of flavonol-based fluorescent indicators of $\beta$ -glycosidase activity**

**Milena Reszka,<sup>a</sup> Illia E. Serdiuk,<sup>b</sup> Karol Kozakiewicz,<sup>a</sup> Andrzej Nowacki,<sup>a</sup>**

**Henryk Myszka,<sup>a</sup> Piotr Bojarski,<sup>b</sup> Beata Liberek<sup>a,\*</sup>**

<sup>a</sup>*Faculty of Chemistry, University of Gdańsk, Wita Stwosza 63, 80-308 Gdańsk, Poland*

<sup>b</sup>*Faculty of Mathematics, Physics and Informatics, University of Gdańsk, Wita Stwosza 63,  
80-308 Gdańsk, Poland*

\*E-mail address: [beata.liberek@ug.edu.pl](mailto:beata.liberek@ug.edu.pl)

**Fluorescence spectra at pH 5.2; results of the ESP analysis; NMR spectra of compounds considered.**

#### **Table of Contents**

|                                                                                                                                                                                                                                                                                                                        |    |
|------------------------------------------------------------------------------------------------------------------------------------------------------------------------------------------------------------------------------------------------------------------------------------------------------------------------|----|
| <b>Figure S1:</b> Atom numbering system for the compounds considered .....                                                                                                                                                                                                                                             | S2 |
| <b>Figure S2:</b> Changes in the fluorescence spectra during enzymatic hydrolysis of probes <b>11<sub>a-f</sub></b> at pH 5.2. ....                                                                                                                                                                                    | S3 |
| <b>Figure S3:</b> Changes in the fluorescence spectra during enzymatic hydrolysis of probes <b>12<sub>a,b,e</sub></b> and <b>13<sub>a,b,e</sub></b> at pH 5.2. ....                                                                                                                                                    | S4 |
| <b>Figure S4:</b> The plots of $\ln c_0/c_t$ vs time for enzymatic hydrolysis of <b>12<sub>a,b,e</sub></b> and <b>13<sub>a,b,e</sub></b> at pH 5.2. ....                                                                                                                                                               | S5 |
| <b>Table S1:</b> Charge distribution in the anionic forms of <b>4<sub>a-4_f</sub></b> from the ESP analysis. ....                                                                                                                                                                                                      | S5 |
| NMR spectra of <b>3<sub>b</sub>+3<sub>b'</sub></b> , <b>3<sub>b</sub></b> , <b>4<sub>b</sub></b> , <b>4<sub>e</sub></b> , <b>4<sub>f</sub></b> , <b>8<sub>b,f</sub></b> , <b>9<sub>a,b,e</sub></b> , <b>10<sub>a,b,e</sub></b> , <b>11<sub>b,f</sub></b> , <b>12<sub>a,b,e</sub></b> , <b>13<sub>a,b,e</sub></b> ..... | S6 |

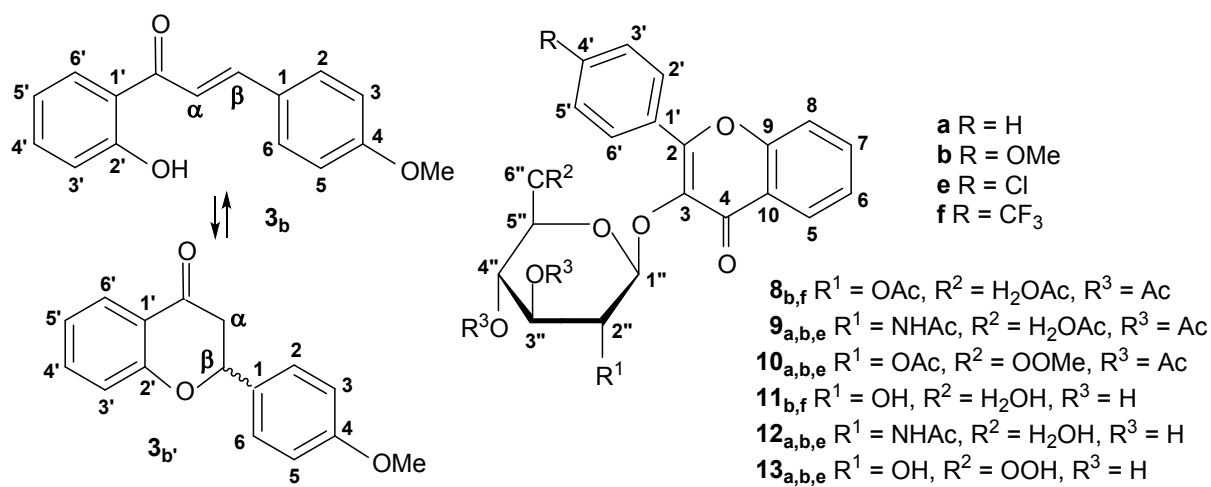

**Figure S1.** The atom numbering system for compounds considered.

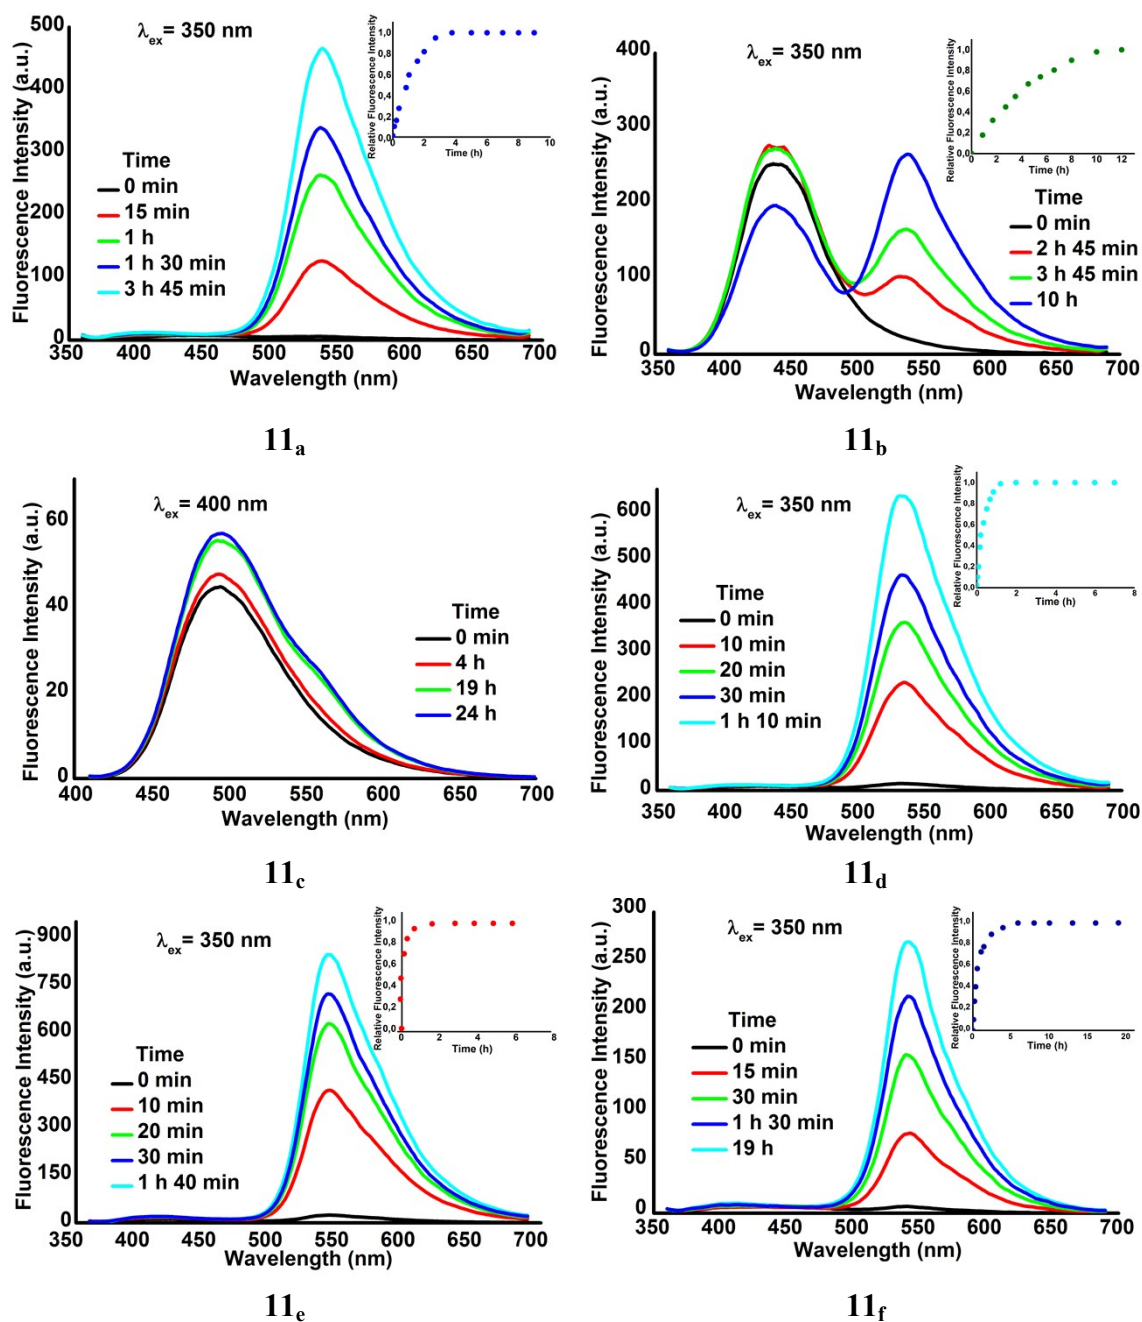

**Figure S2.** Changes in the fluorescence spectra during enzymatic hydrolysis of probes **11**<sub>a-f</sub> at pH 5.2. Insets: plots of relative intensity of the T\* fluorescence ( $I_i^{T^*} / I_{\text{max}}^{T^*}$ ) versus time.

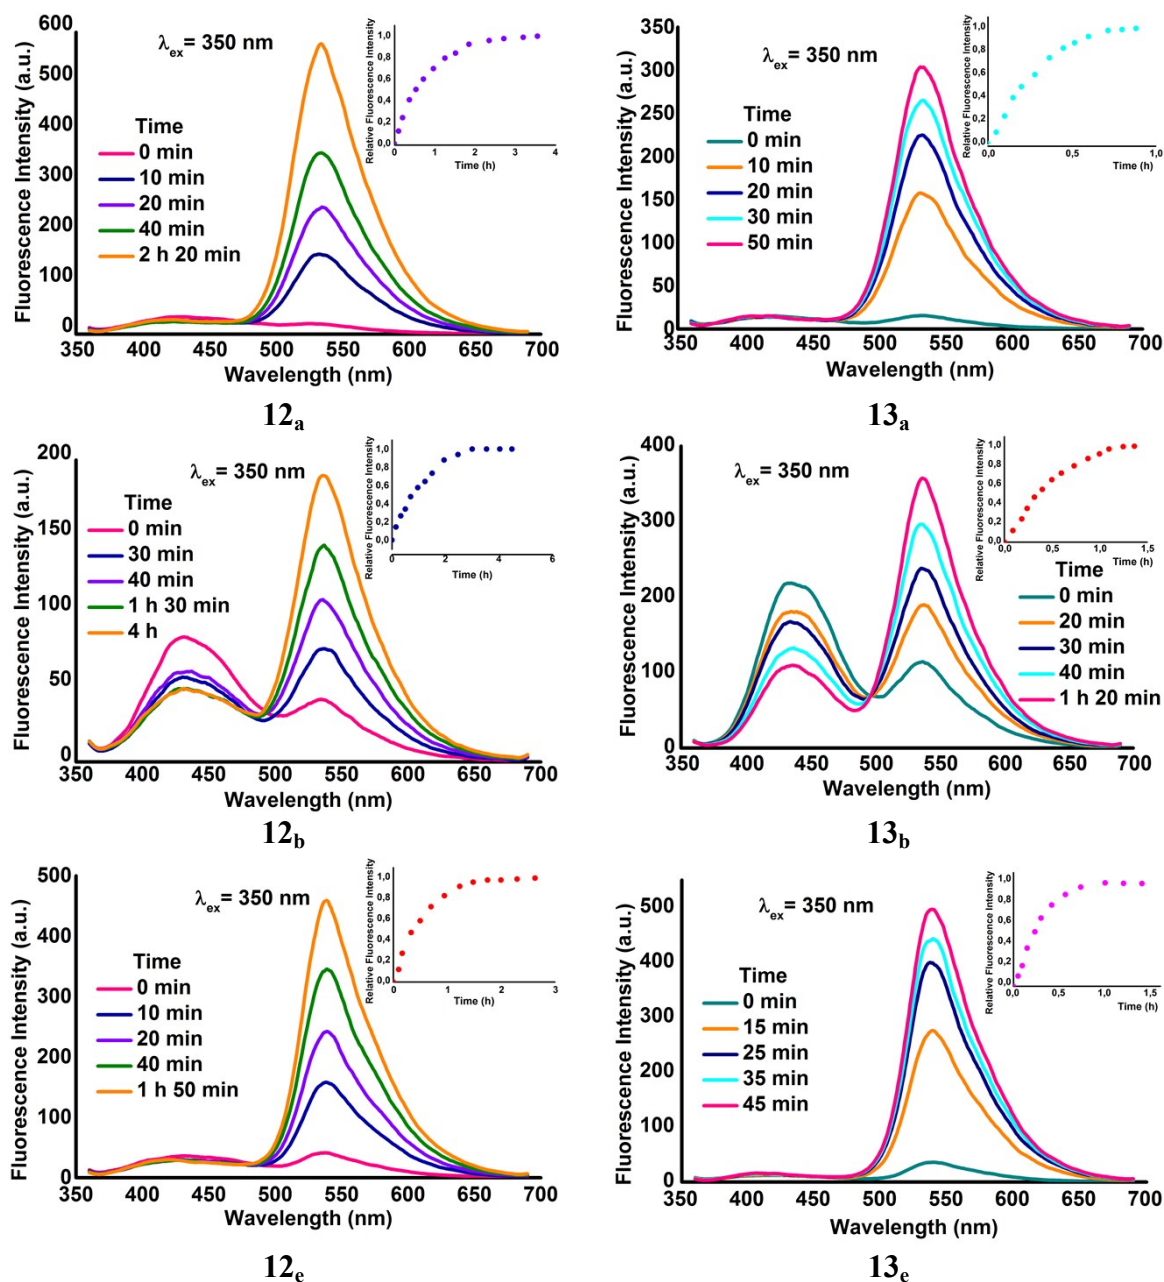

**Figure S3.** Changes in the fluorescence spectra during enzymatic hydrolysis of probes 12<sub>a,b,e</sub> and 13<sub>a,b,e</sub> at pH 5.2. Insets: plots of relative intensity of the T\* fluorescence ( $I_i^{T^*} / I_{max}^{T^*}$ ) versus time.

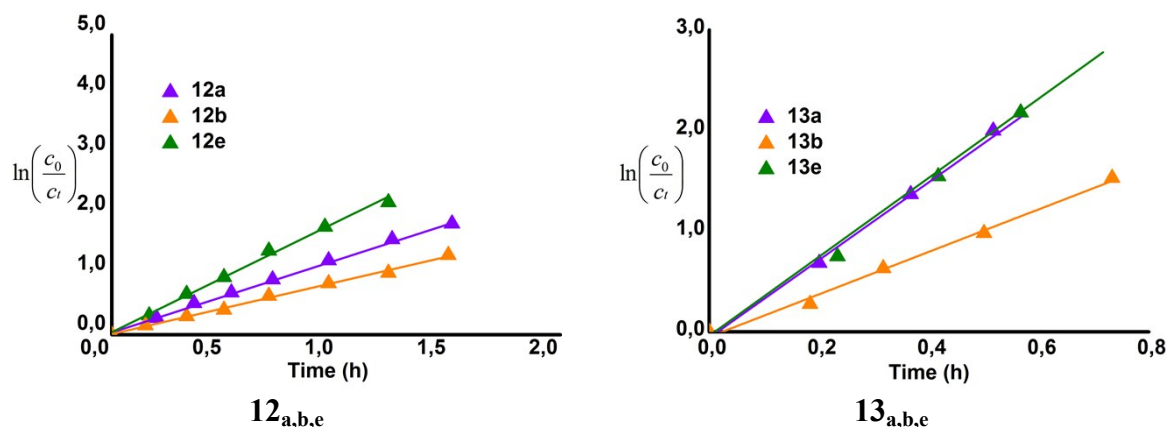

**Figure S4.** The plots of  $\ln c_0/c_t$  vs time for enzymatic hydrolysis of  $12_{a,b,e}$  and  $13_{a,b,e}$  at pH 5.2.

**Table S1.** The charge distribution in the anionic forms of  $4_a$ - $4_f$  from the ESP analysis.

| Atom | $4_a$      | $4_b$                      | $4_c$                                     | $4_d$       | $4_e$        | $4_f$                                                   |
|------|------------|----------------------------|-------------------------------------------|-------------|--------------|---------------------------------------------------------|
| O1   | -0.2289    | -0.2365                    | -0.2336                                   | -0.2522     | -0.2469      | -0.2396                                                 |
| C2   | -0.4015    | -0.0413                    | -0.3763                                   | -0.0564     | -0.1514      | -0.2827                                                 |
| O3   | -0.6036    | -0.5948                    | -0.6116                                   | -0.5878     | -0.5838      | -0.5634                                                 |
| O4   | -0.5186    | -0.5436                    | -0.5268                                   | -0.5389     | -0.5321      | -0.5437                                                 |
| C4   | 0.4074     | 0.5275                     | 0.4132                                    | 0.5311      | 0.5102       | 0.5778                                                  |
| C9   | 0.4638     | 0.3905                     | 0.4613                                    | 0.3958      | 0.4260       | 0.5035                                                  |
| C10  | -0.2307    | -0.3404                    | -0.2353                                   | -0.3166     | -0.3138      | -0.3738                                                 |
| C1'  | 0.4683     | -0.0607                    | 0.4254                                    | 0.0181      | 0.1949       | 0.3562                                                  |
| C2'  | -0.3303    | -0.0321                    | -0.2964                                   | -0.0950     | -0.2178      | -0.2348                                                 |
| C3'  | -0.1184    | -0.3781                    | -0.3169                                   | -0.4018     | -0.1120      | -0.1744                                                 |
| C4'  | -0.2284    | -0.4821                    | -0.1803                                   | -0.4130     | -0.0062      | -0.0812                                                 |
| C5'  | -0.0807    | -0.4857                    | -0.2656                                   | -0.3682     | -0.1297      | -0.1678                                                 |
| C6'  | -0.2818    | -0.1160                    | -0.2462                                   | -0.0937     | -0.2390      | -0.2351                                                 |
| R    | 0.1010 (H) | -0.3527 (O)<br>-0.0476 (C) | -0.0764 (N)<br>-0.1184 (C)<br>-0.1349 (C) | -0.2622 (F) | -0.2013 (Cl) | 0.6092 (C)<br>-0.2253 (F)<br>-0.2404 (F)<br>-0.2404 (F) |

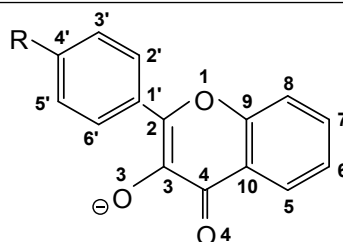

1.  $^1\text{H}$  NMR spectrum of  $3_b+3_b'$  (500 MHz,  $\text{CDCl}_3$ )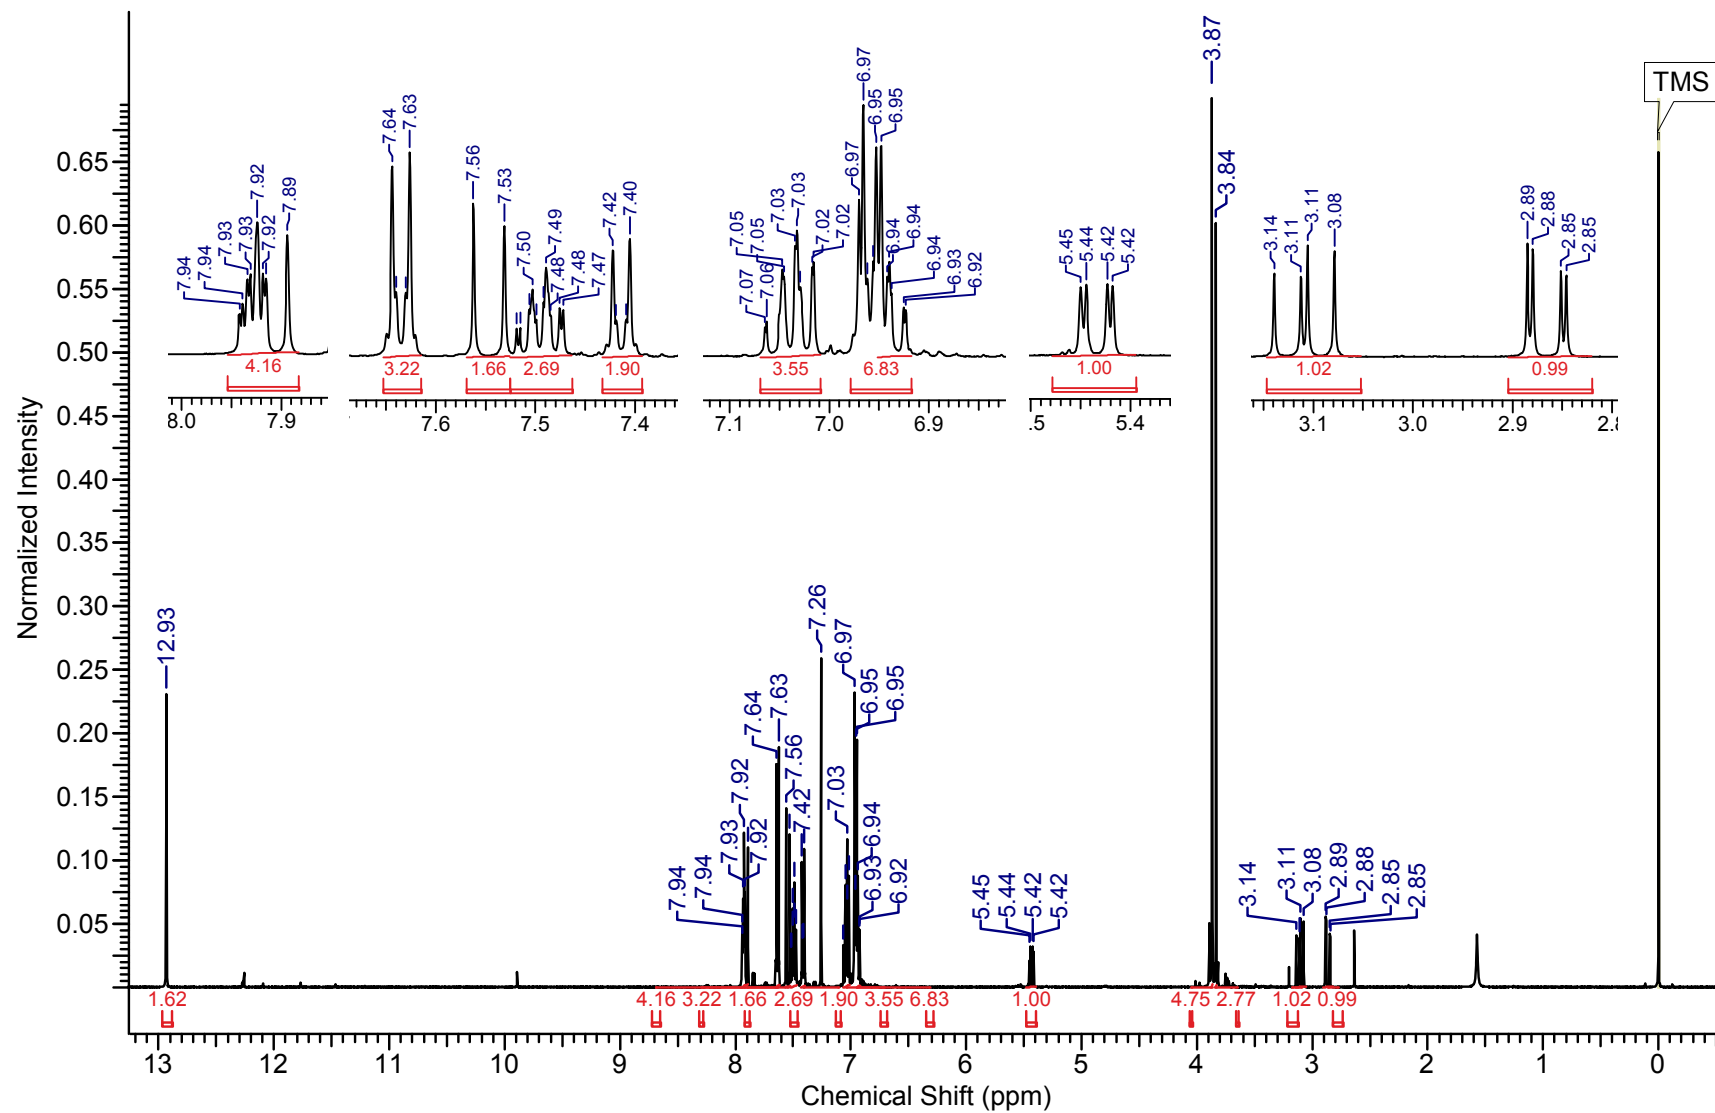

**2.  $^1\text{H}$  NMR spectrum of  $3_b$  (500 MHz,  $\text{CDCl}_3$ )**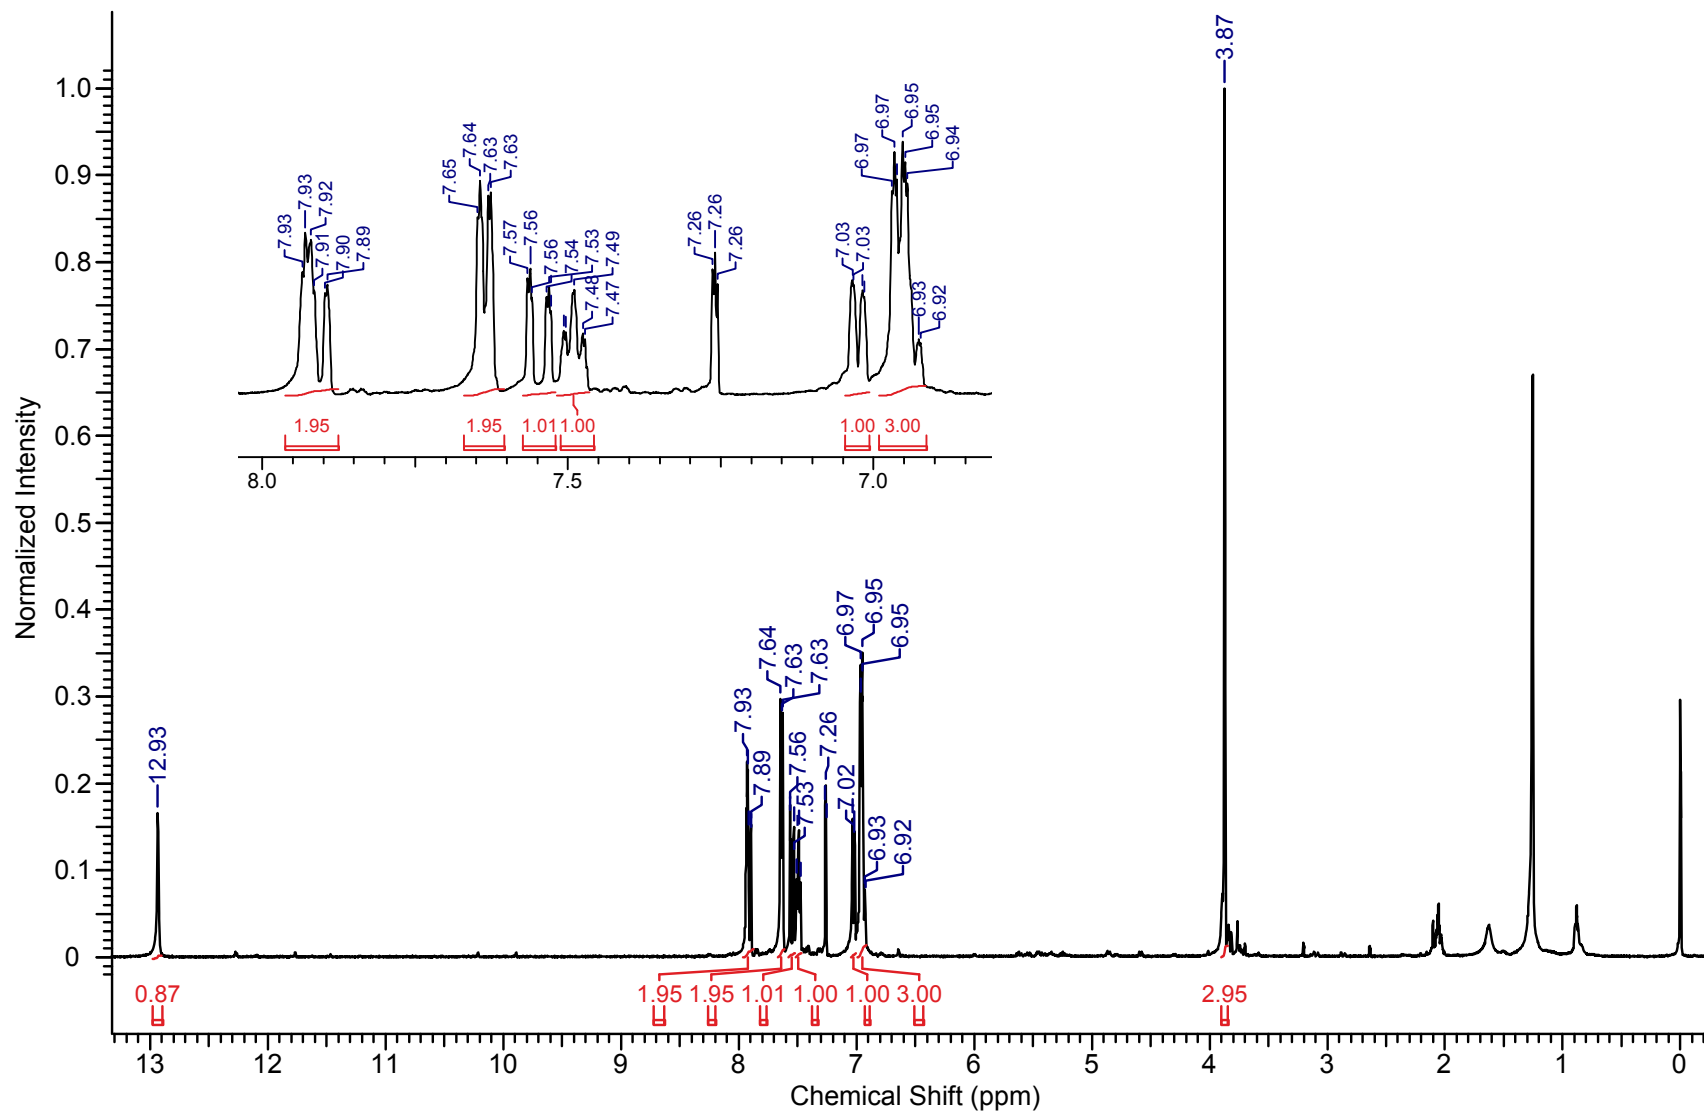

**3.  $^1\text{H}$  NMR spectrum of  $4_b$  (500 MHz,  $\text{DMSO-d}_6$ )**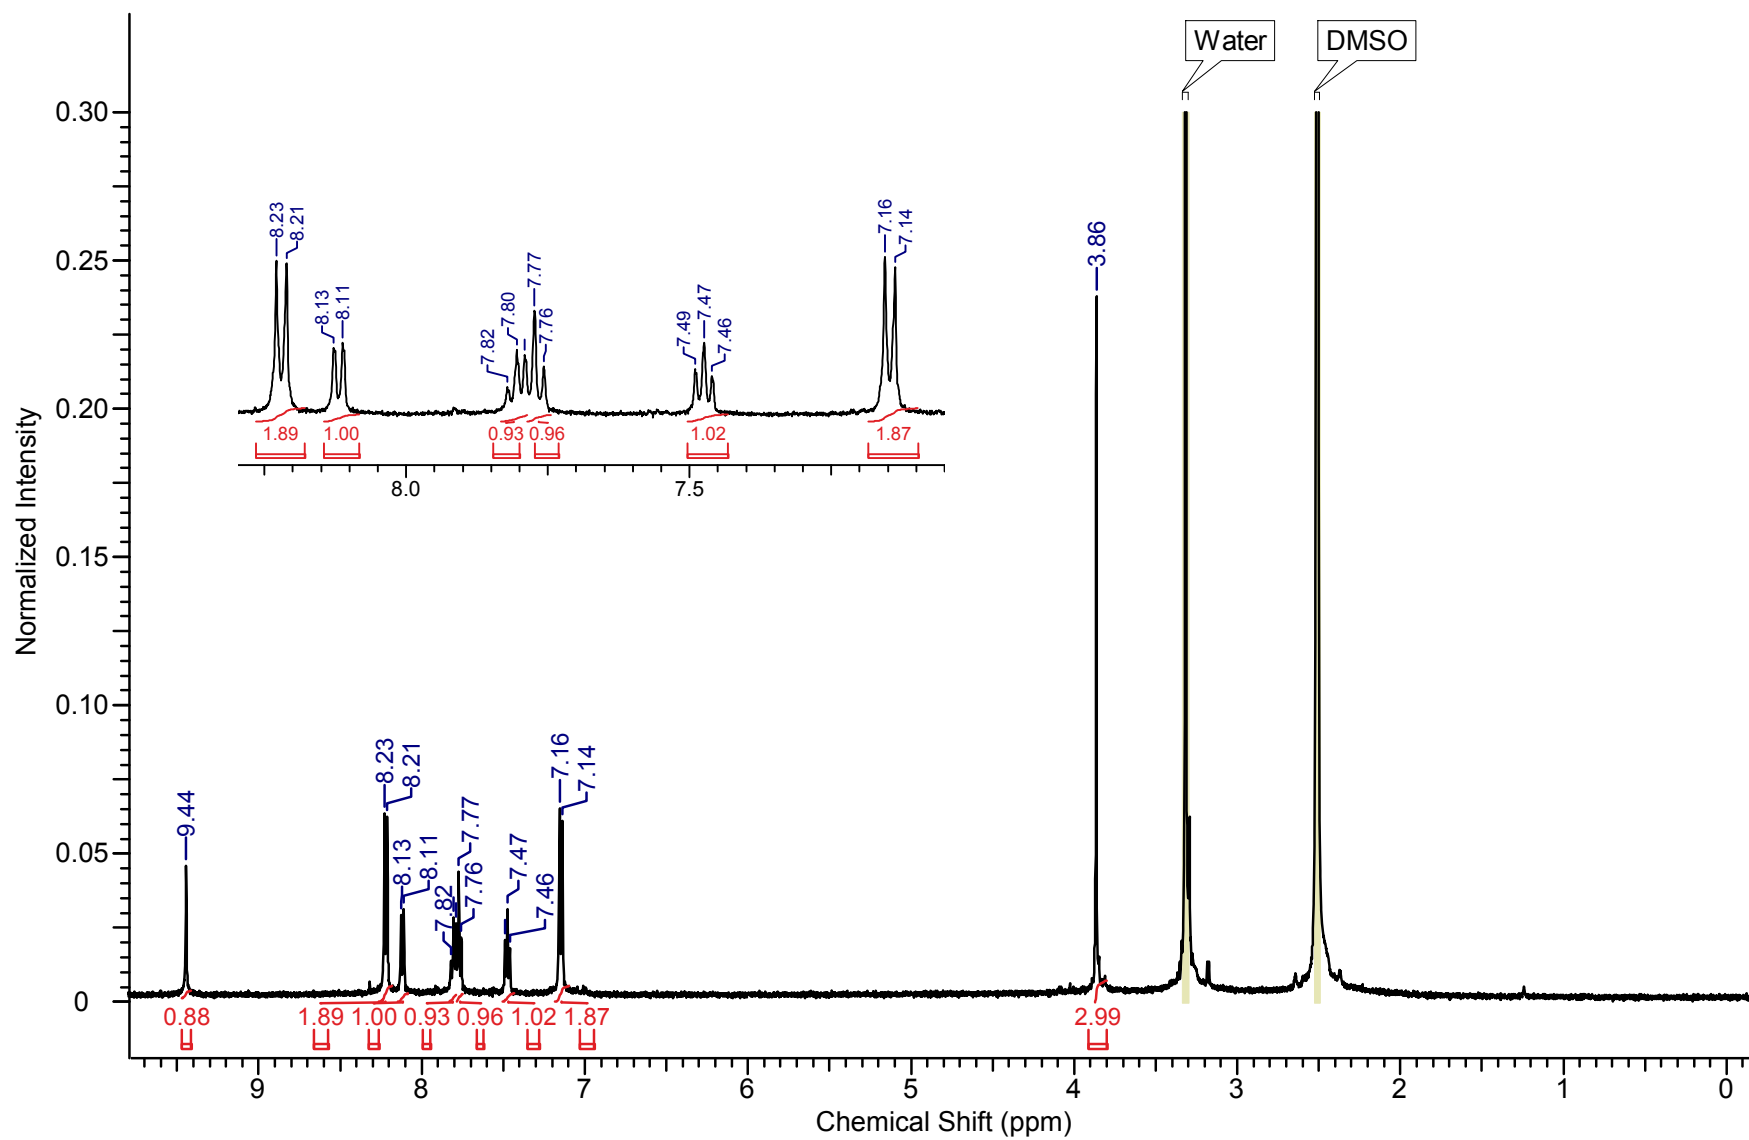



4.  $^1\text{H}$  NMR spectrum of  $4_e$  (500 MHz,  $\text{DMSO-d}_6$ )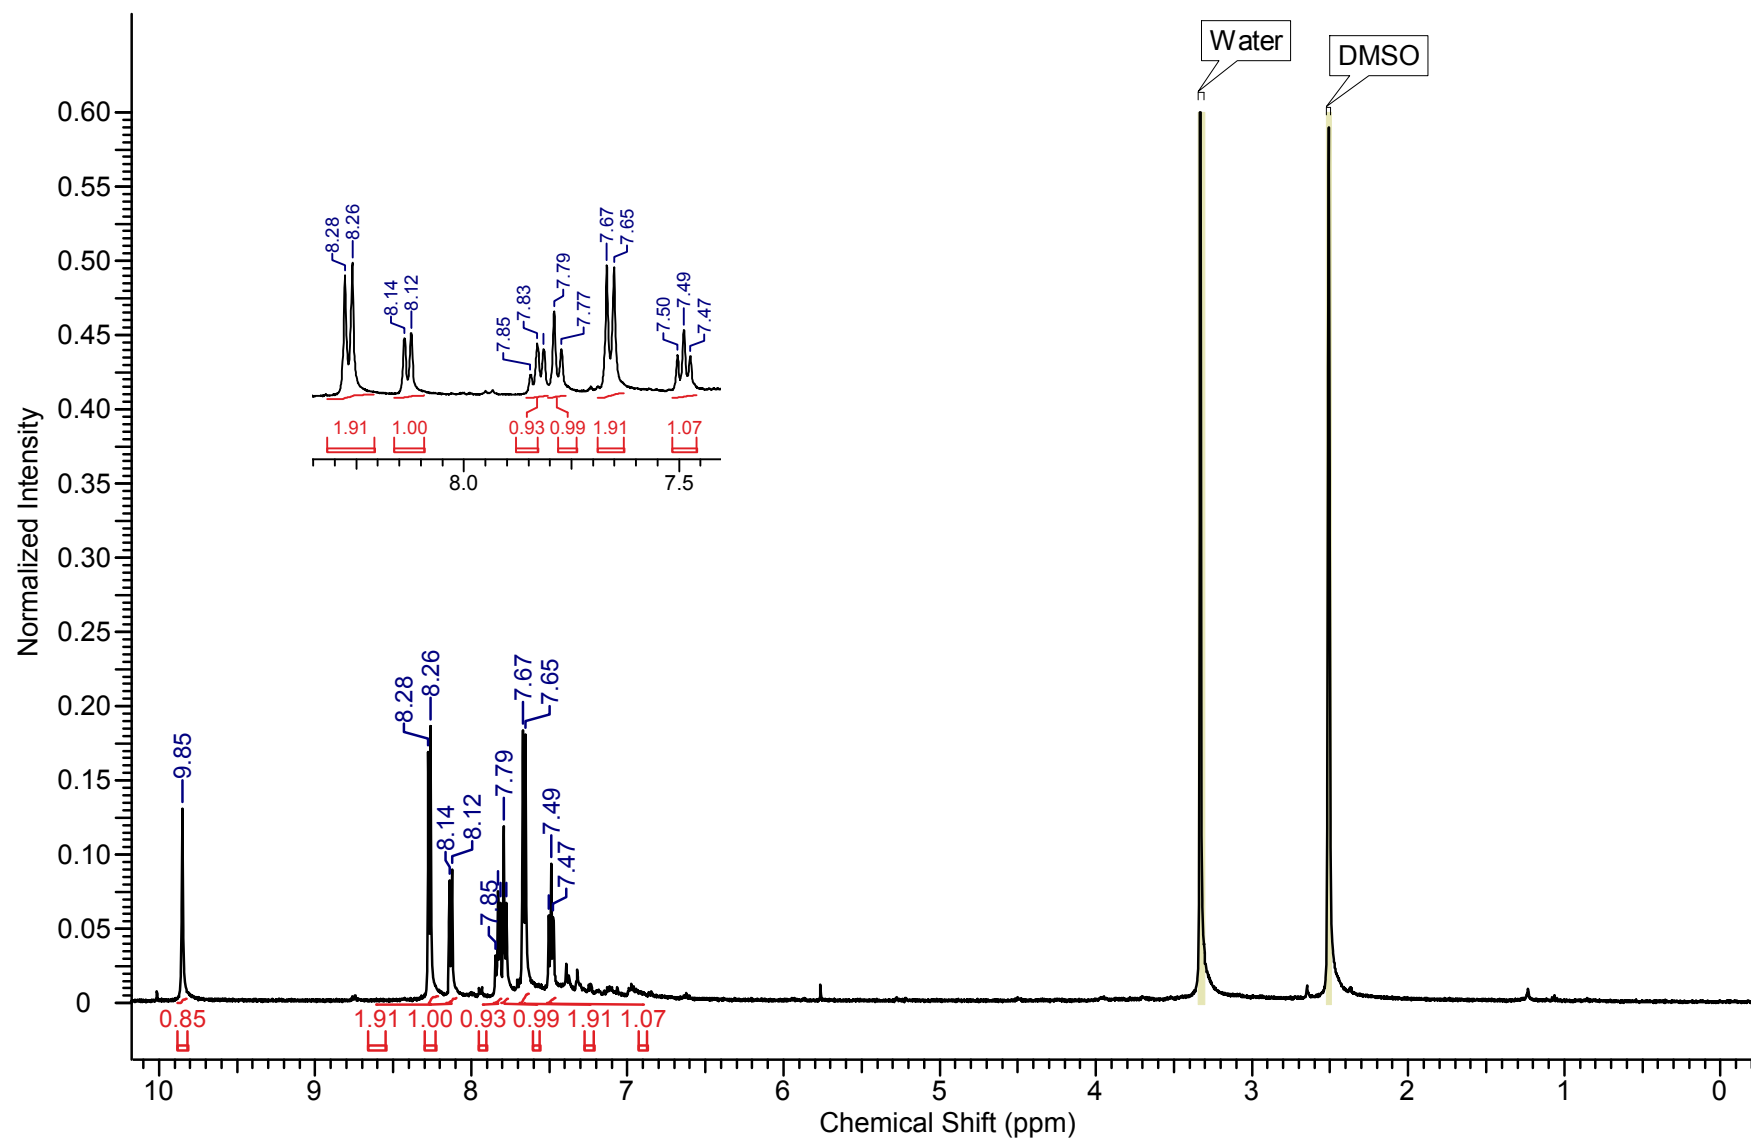

5.  $^1\text{H}$  NMR spectrum of  $4_f$  (500 MHz,  $\text{DMSO-d}_6$ )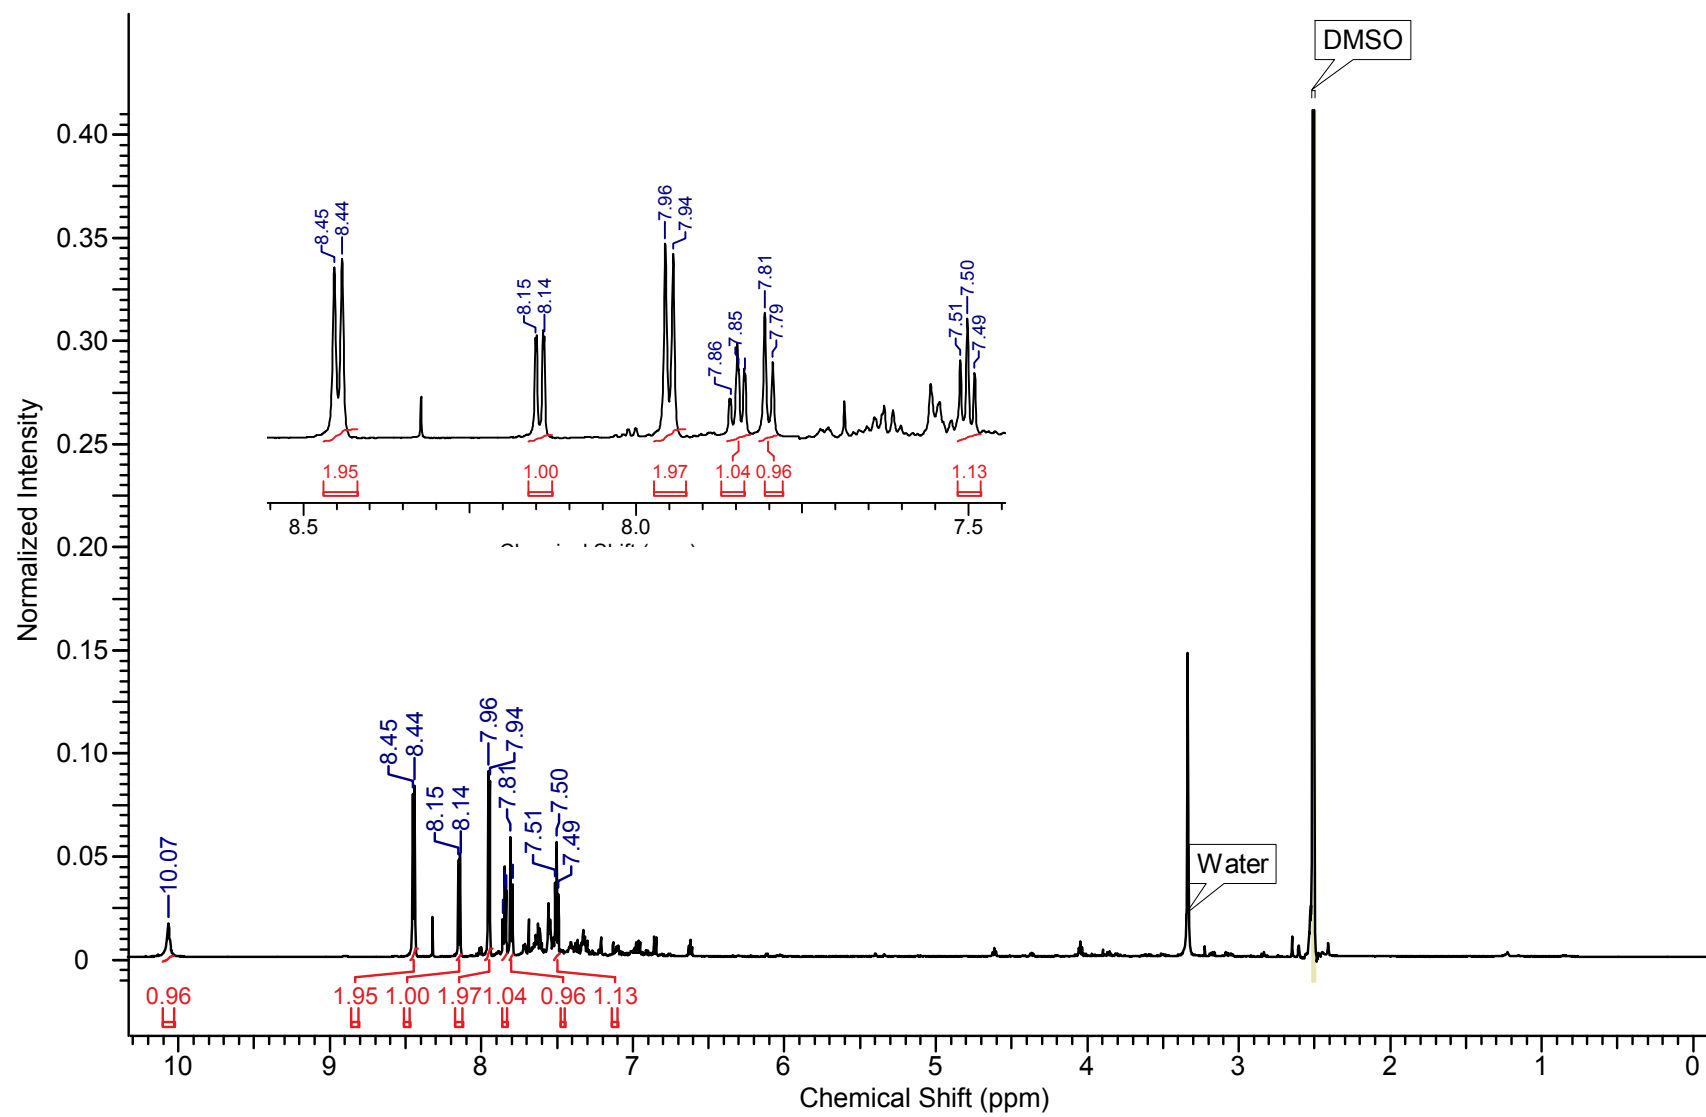

6.  $^{13}\text{C}$  NMR spectrum of  $4_f$  (125 MHz,  $\text{DMSO-d}_6$ )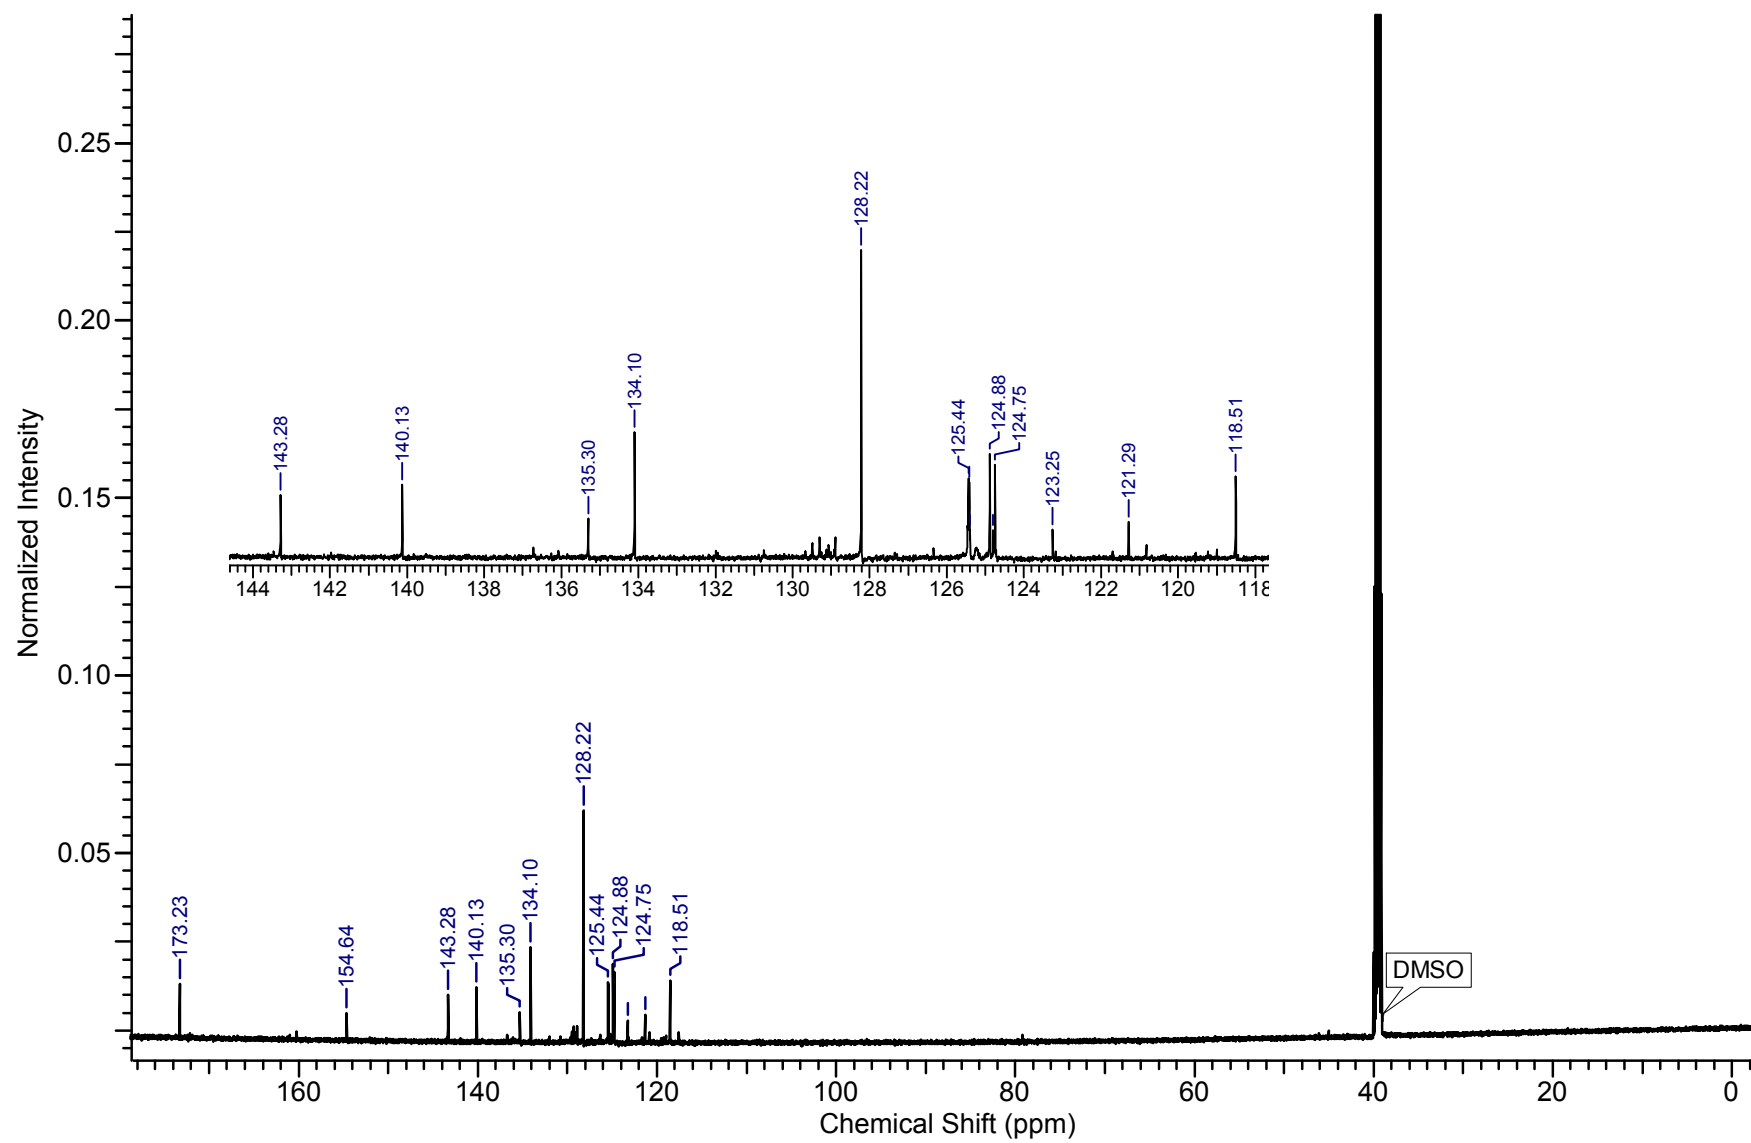

7.  $^1\text{H}$  NMR spectrum of  $8_b$  (500 MHz,  $\text{CDCl}_3$ )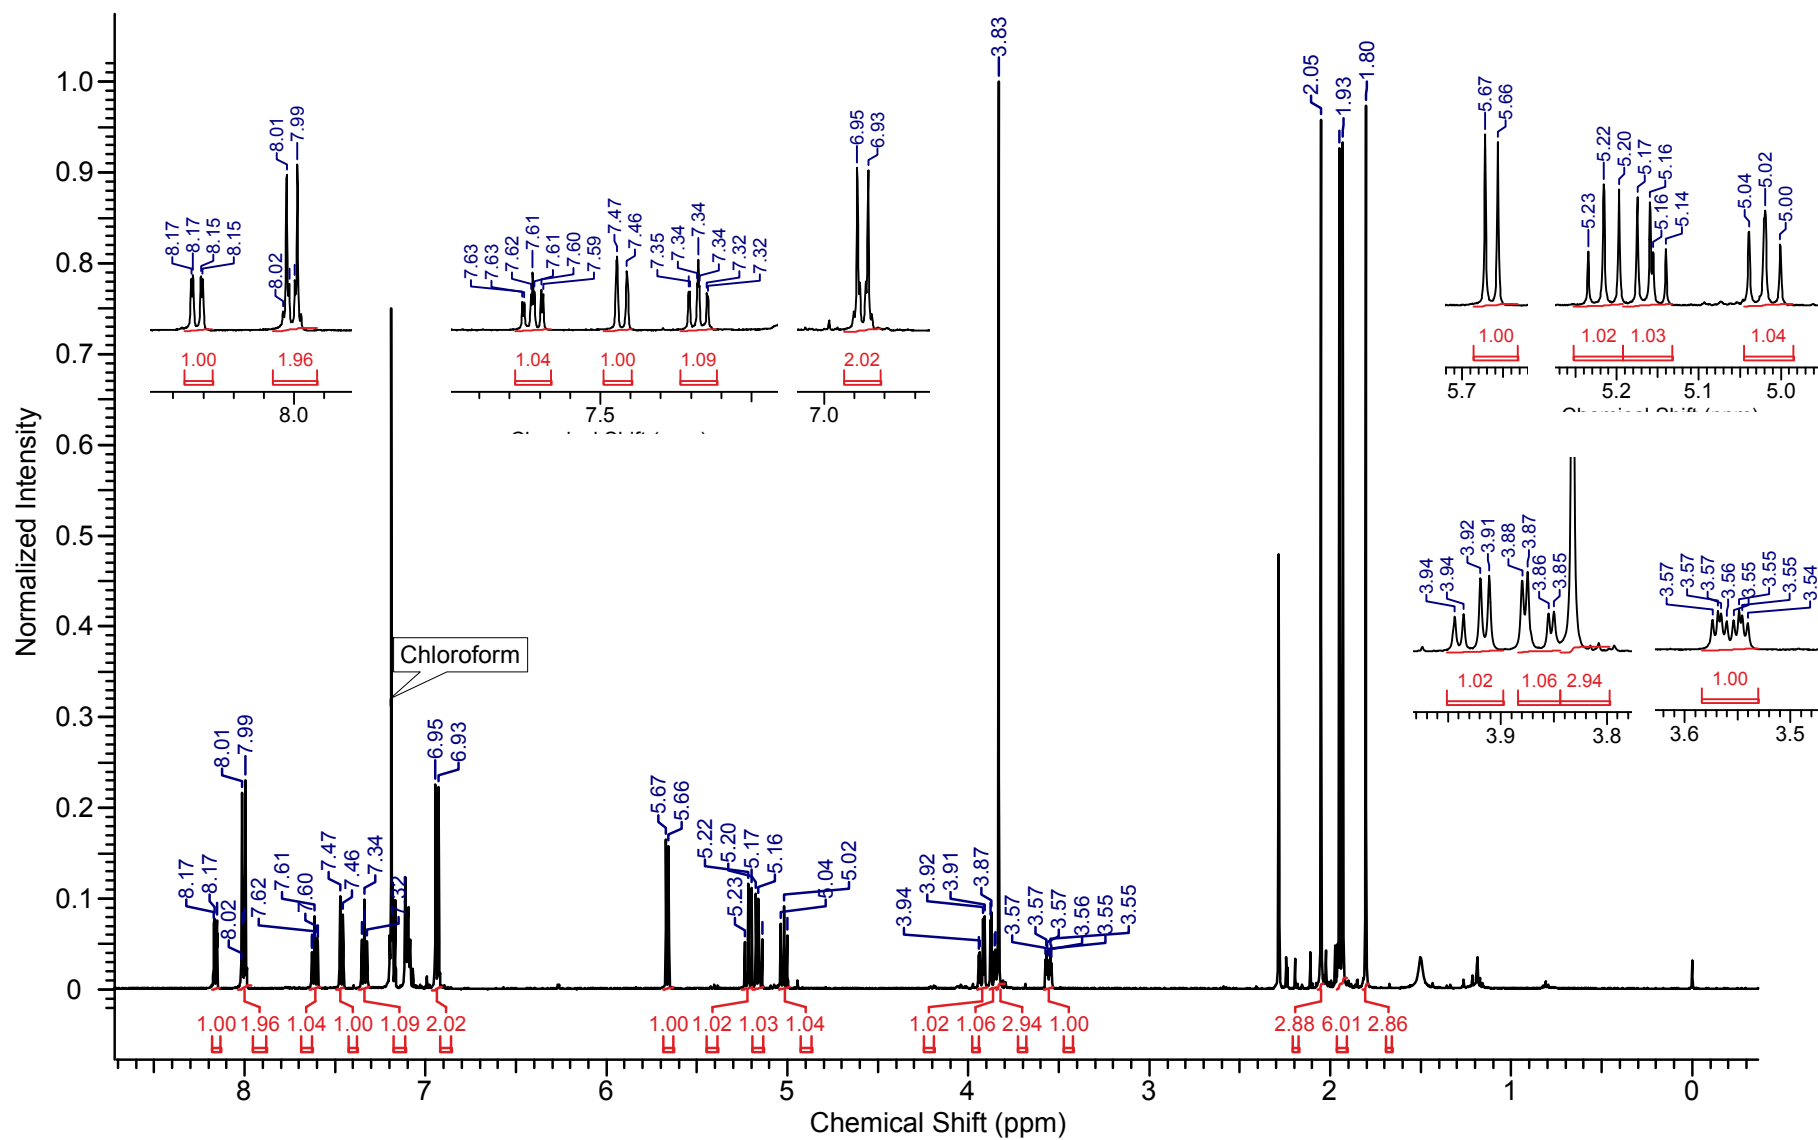

8.  $^{13}\text{C}$  NMR spectrum of  $8_b$  (125 MHz,  $\text{CDCl}_3$ )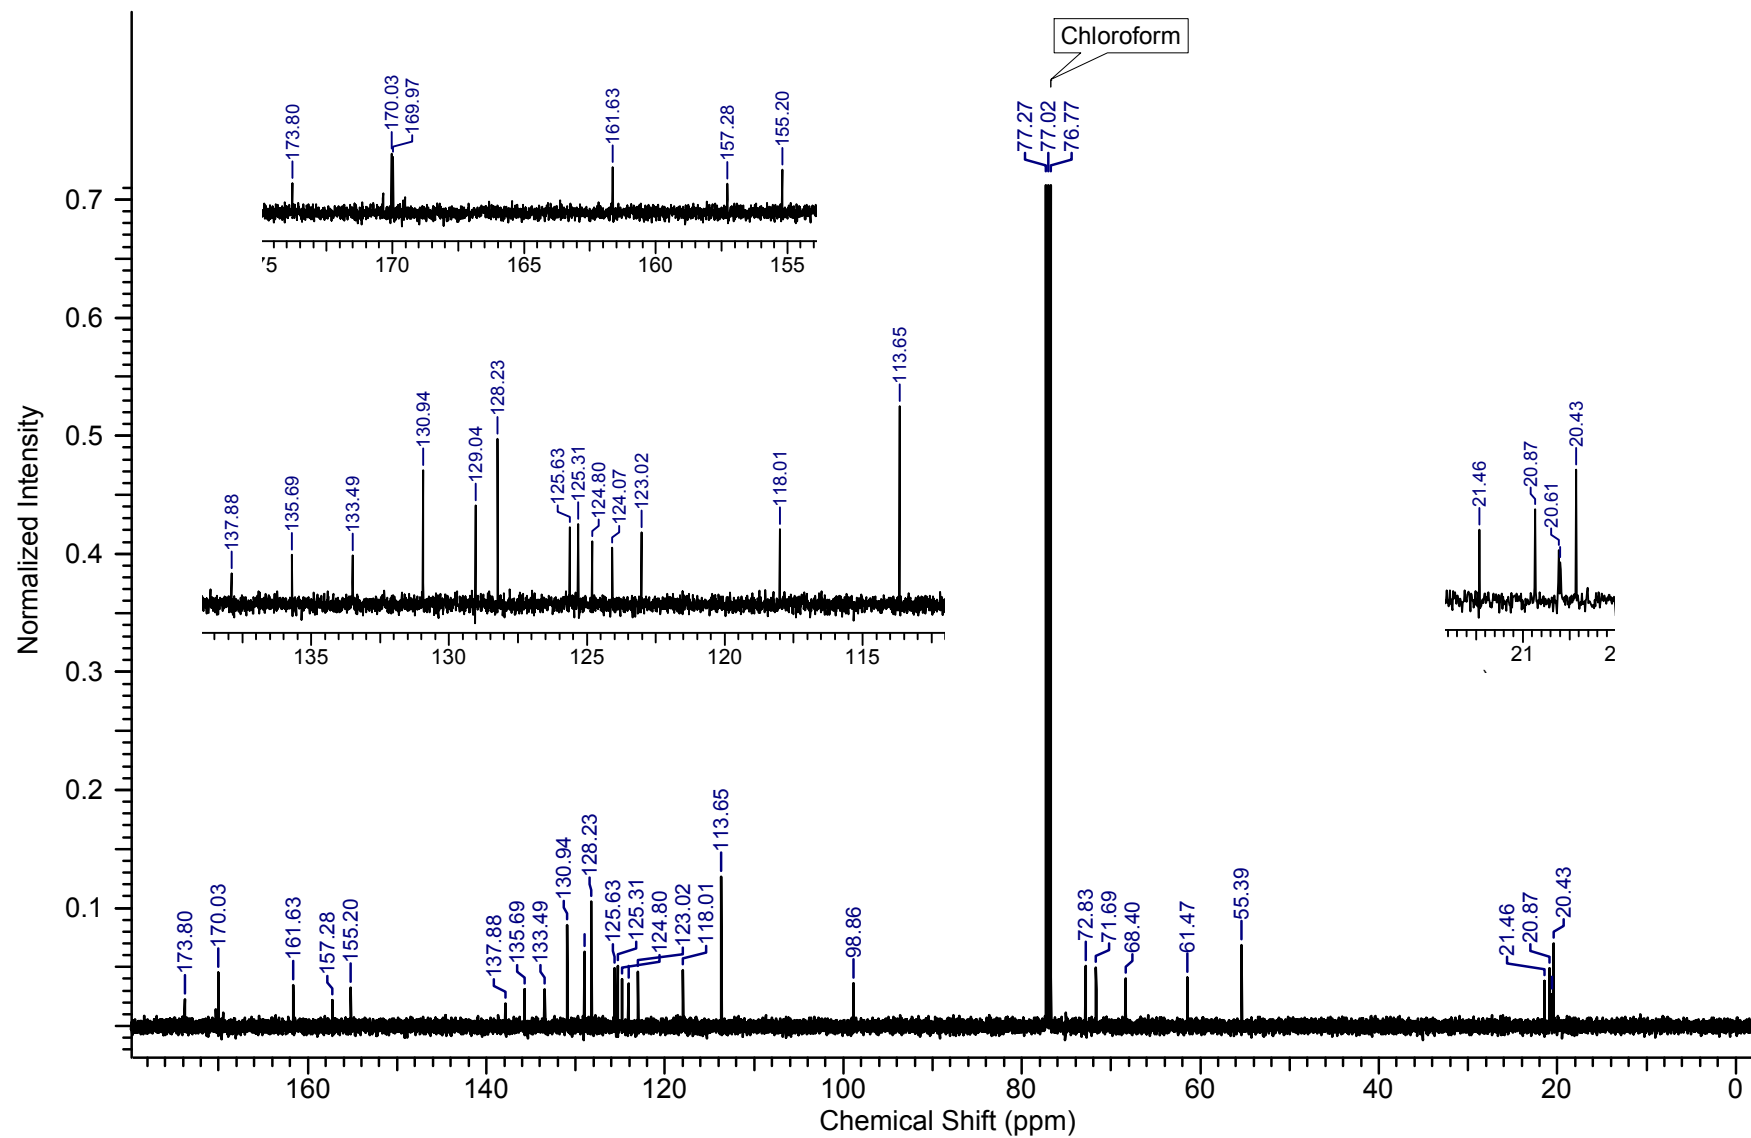

9.  $^1\text{H}$  NMR spectrum of  $8_f$  (500 MHz,  $\text{CDCl}_3$ )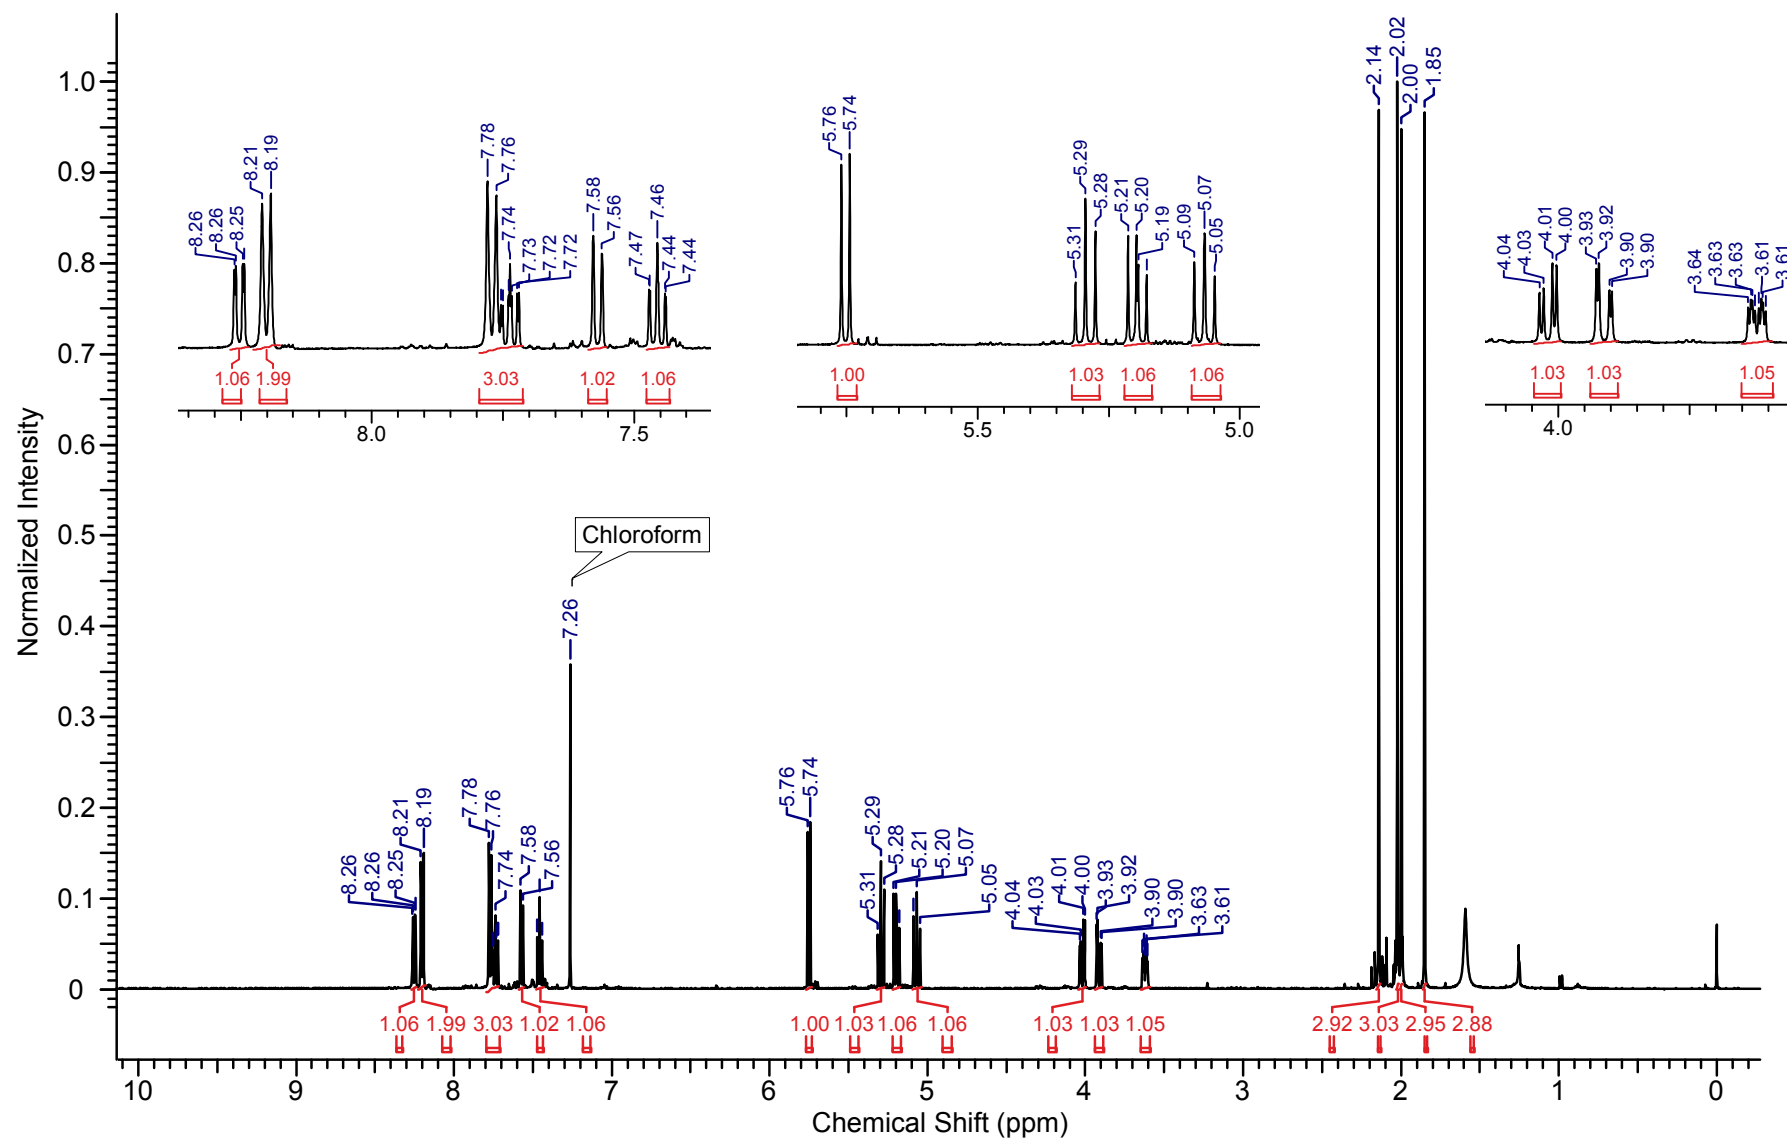

10.  $^{13}\text{C}$  NMR spectrum of  $8_f$  (125 MHz,  $\text{CDCl}_3$ )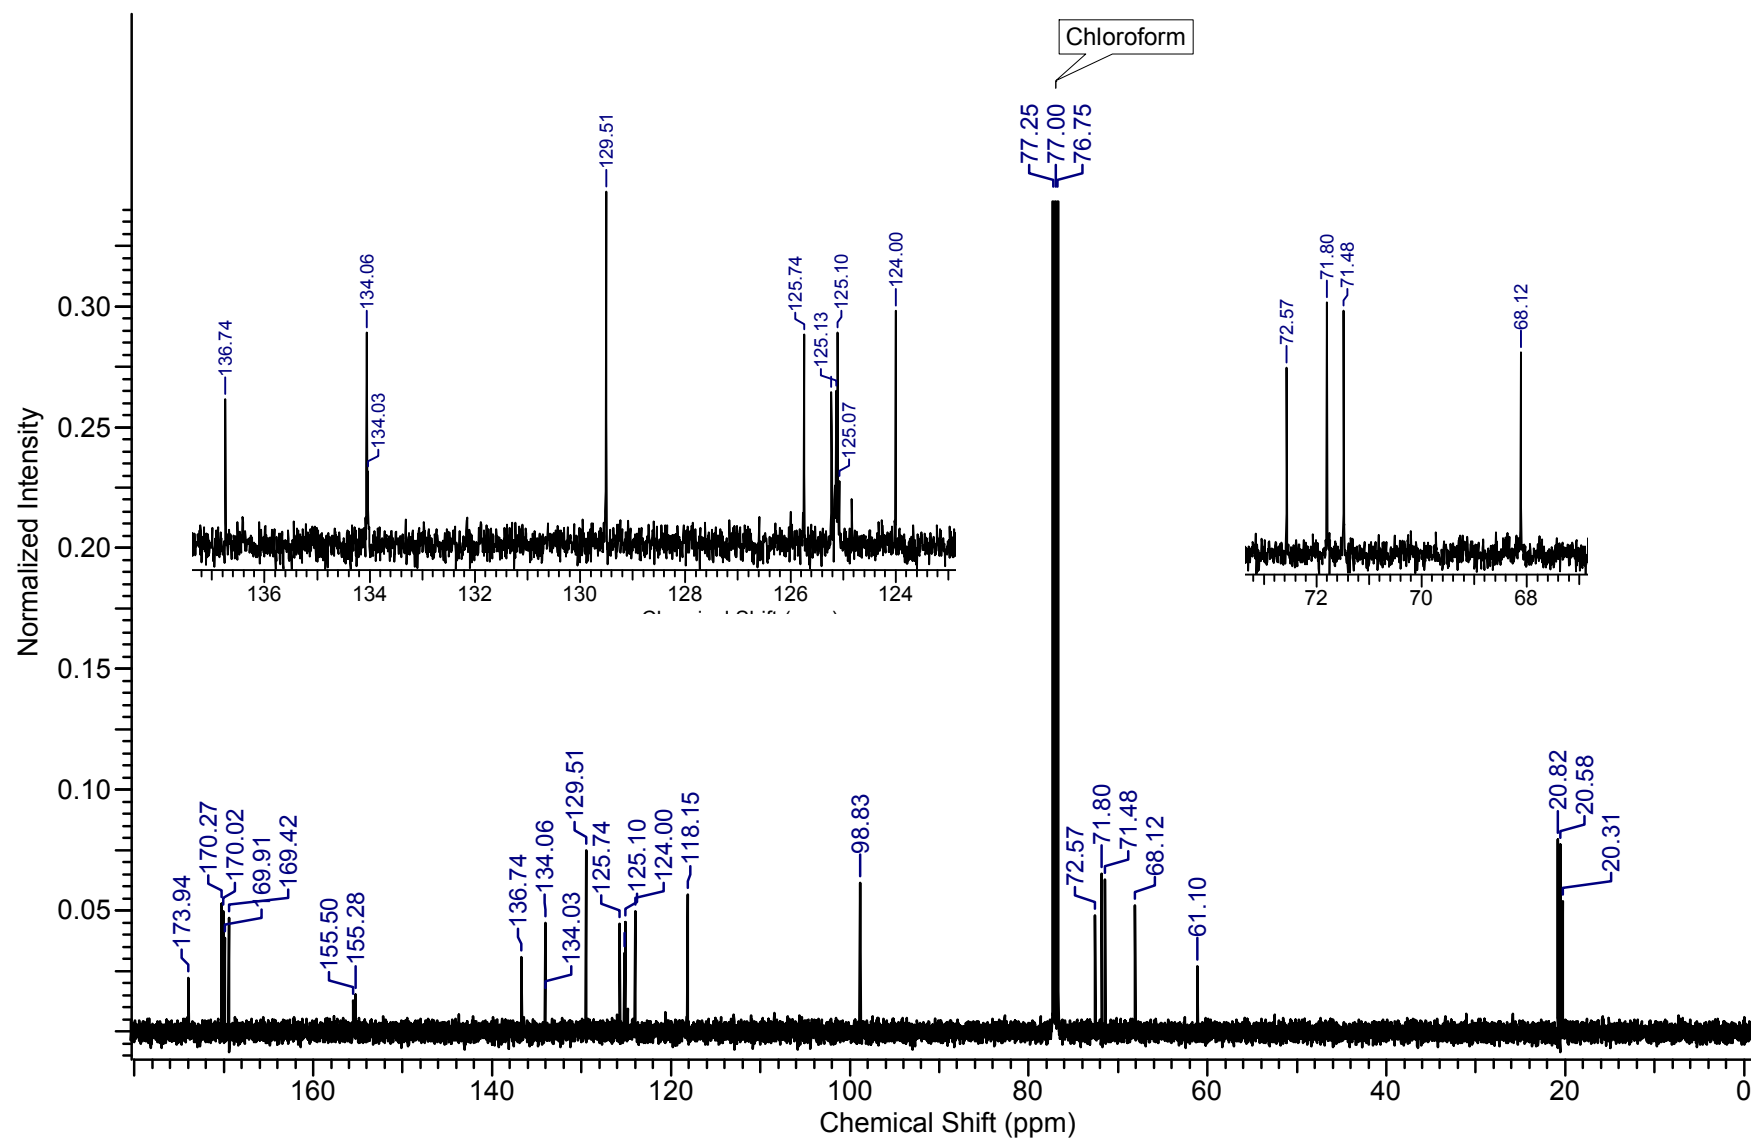

11.  $^1\text{H}$  NMR spectrum of **9<sub>a</sub>** (500 MHz,  $\text{CDCl}_3$ )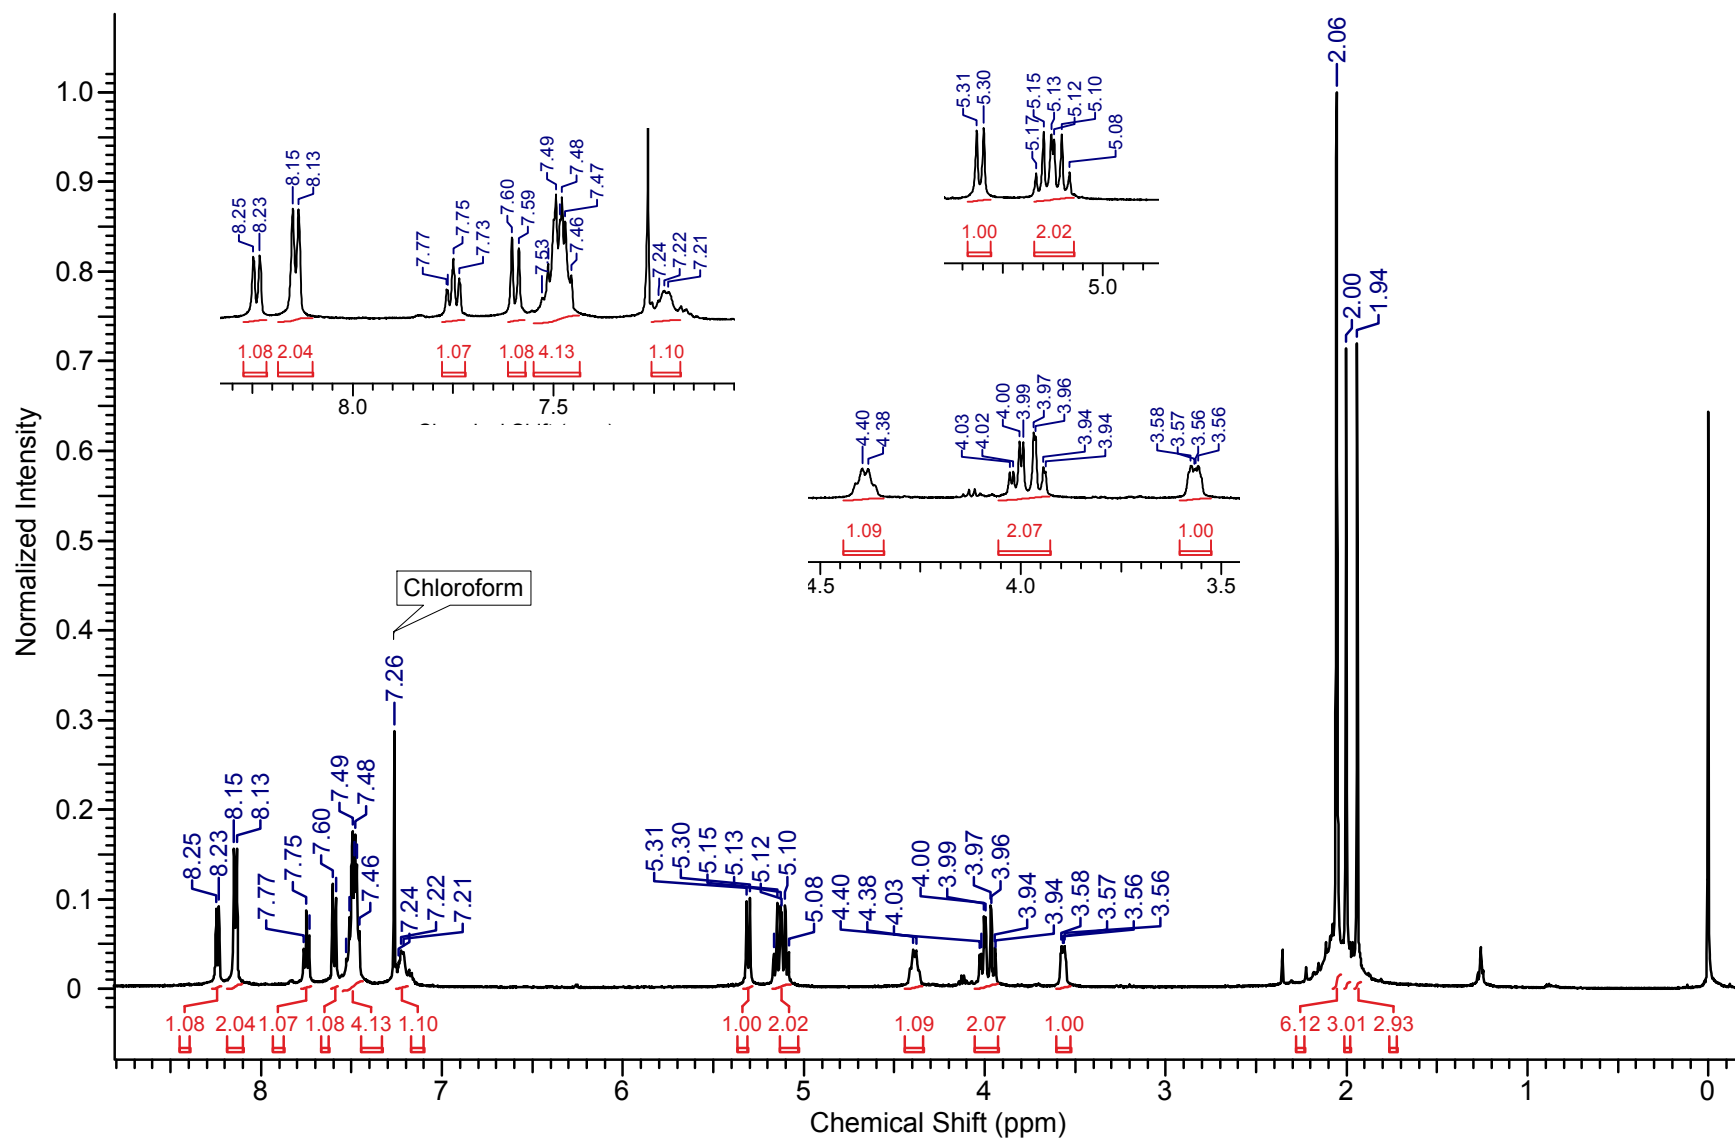



12.  $^{13}\text{C}$  NMR spectrum of  $9_a$  (125 MHz,  $\text{CDCl}_3$ )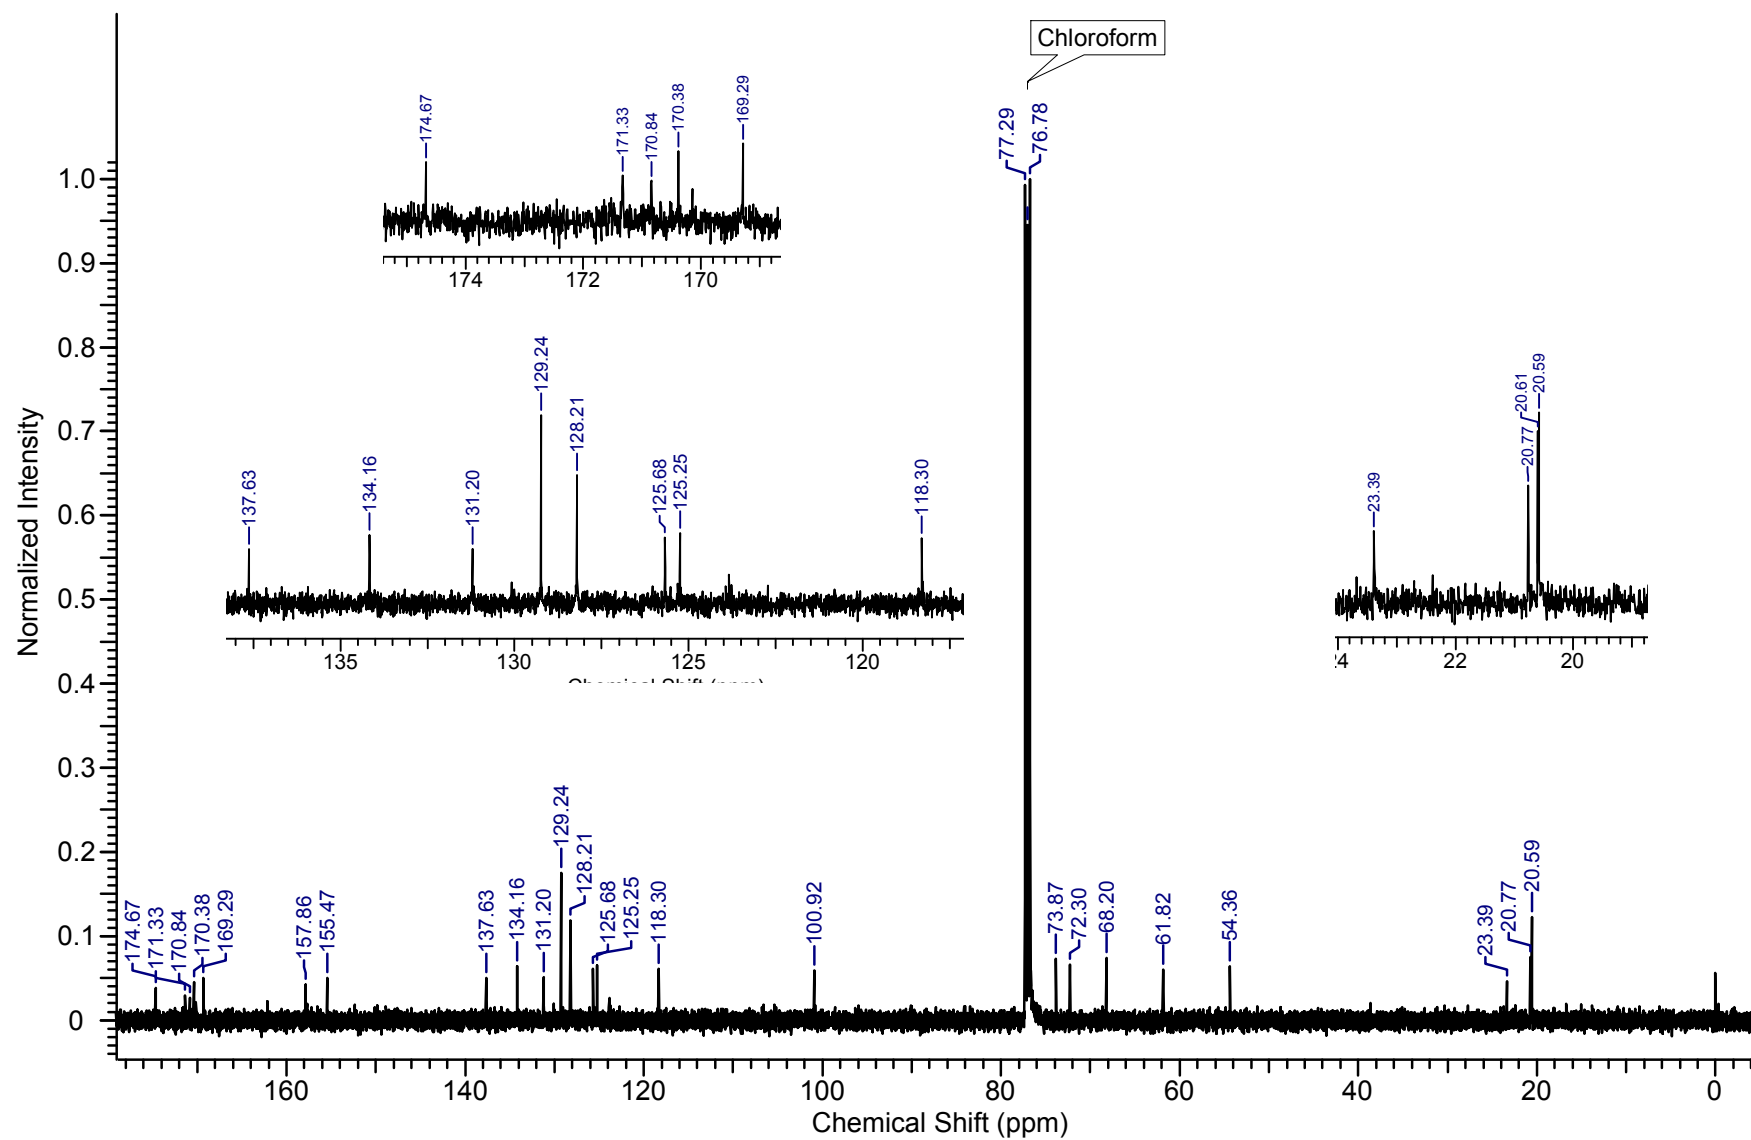

13.  $^1\text{H}$  NMR spectrum of **9<sub>b</sub>** (500 MHz,  $\text{CDCl}_3$ )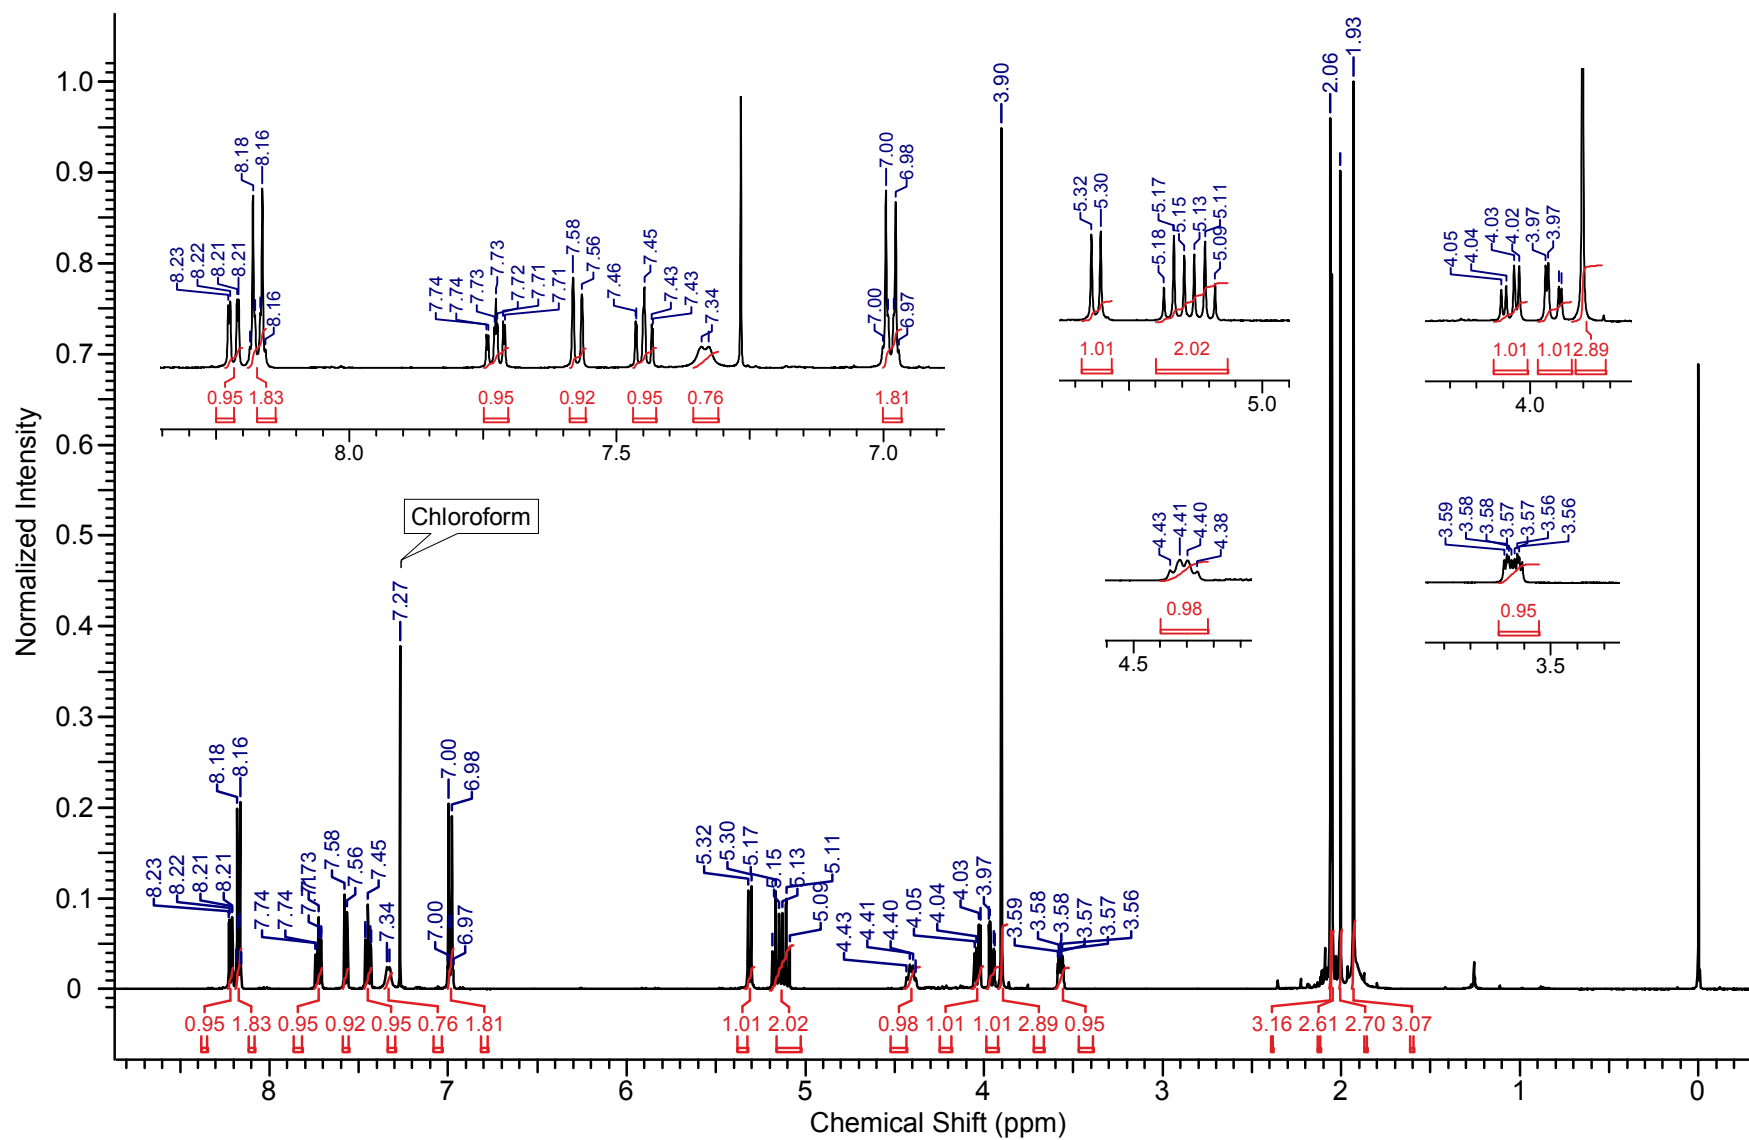

14.  $^{13}\text{C}$  NMR spectrum of **9<sub>b</sub>** (125 MHz,  $\text{CDCl}_3$ )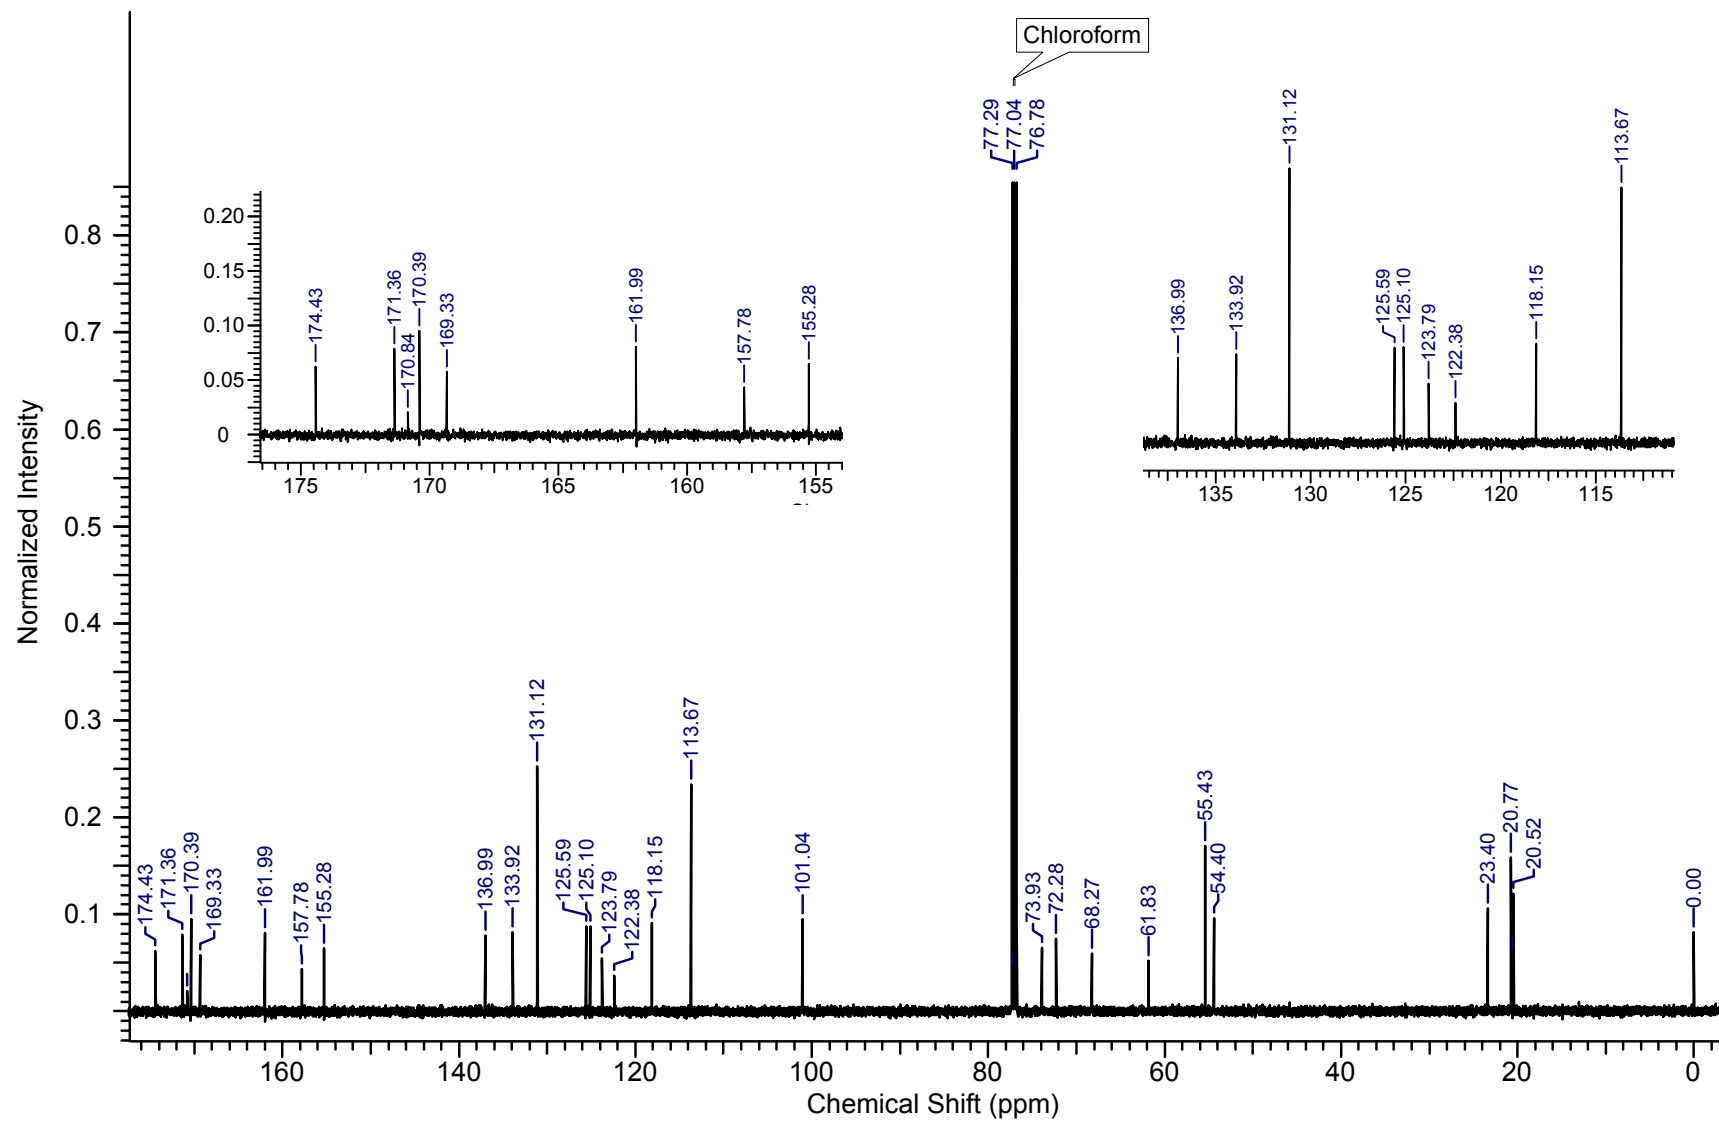

15.  $^1\text{H}$  NMR spectrum of  $9_e$  (500 MHz,  $\text{CDCl}_3$ )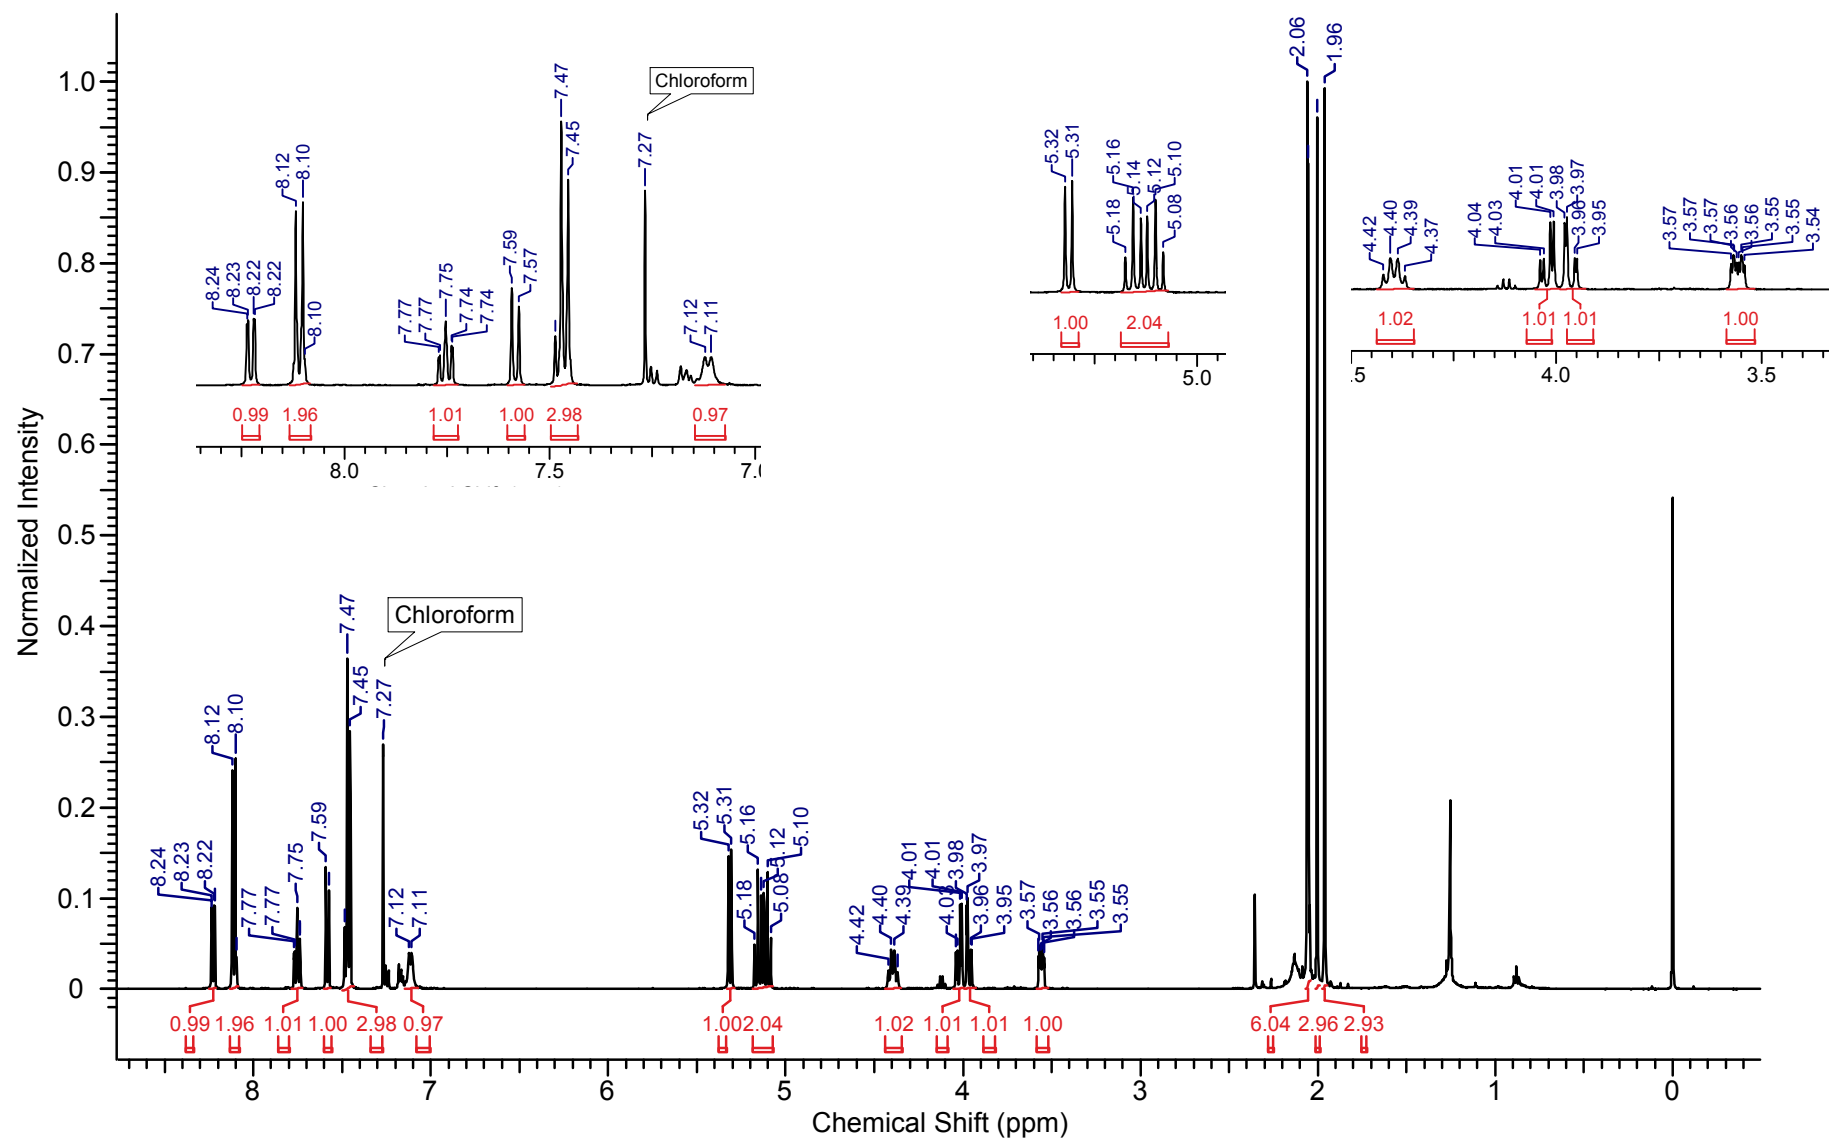

16.  $^{13}\text{C}$  NMR spectrum of  $9_e$  (125 MHz,  $\text{CDCl}_3$ )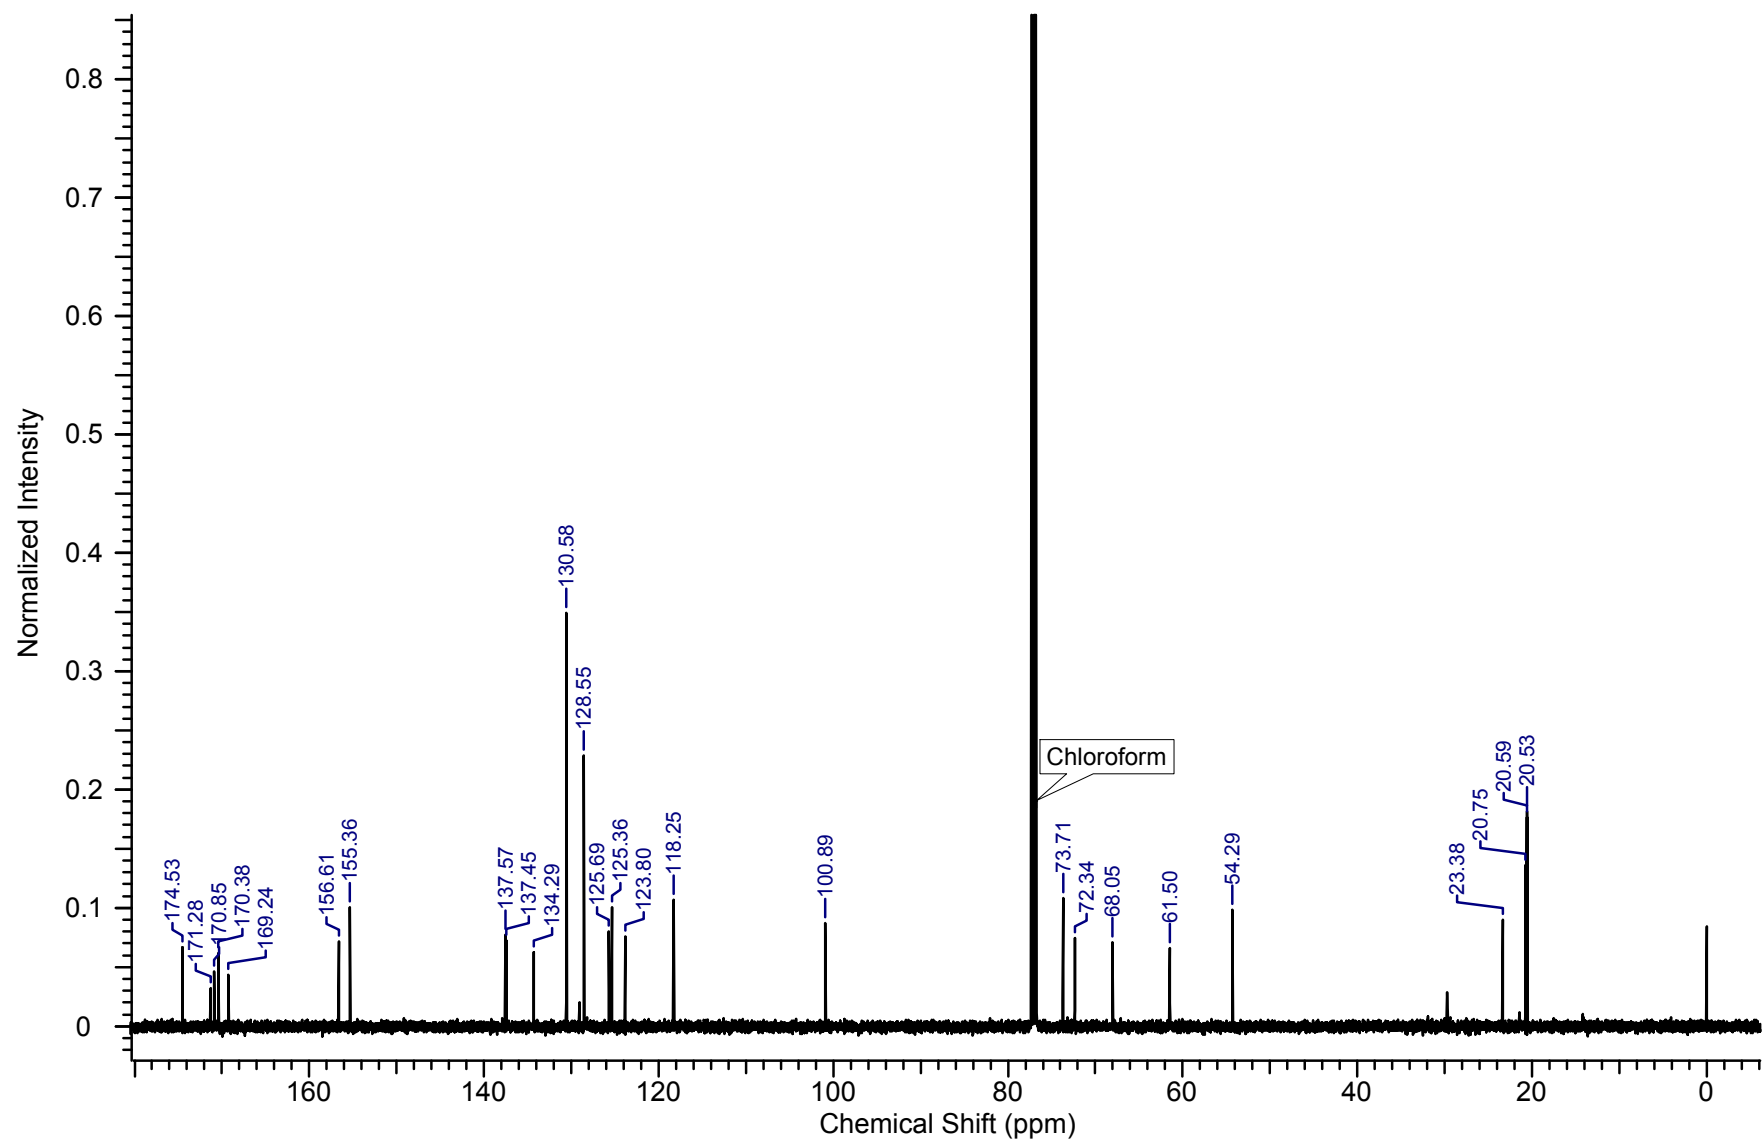

17.  $^1\text{H}$  NMR spectrum of  $10_a$  (500 MHz,  $\text{CDCl}_3$ )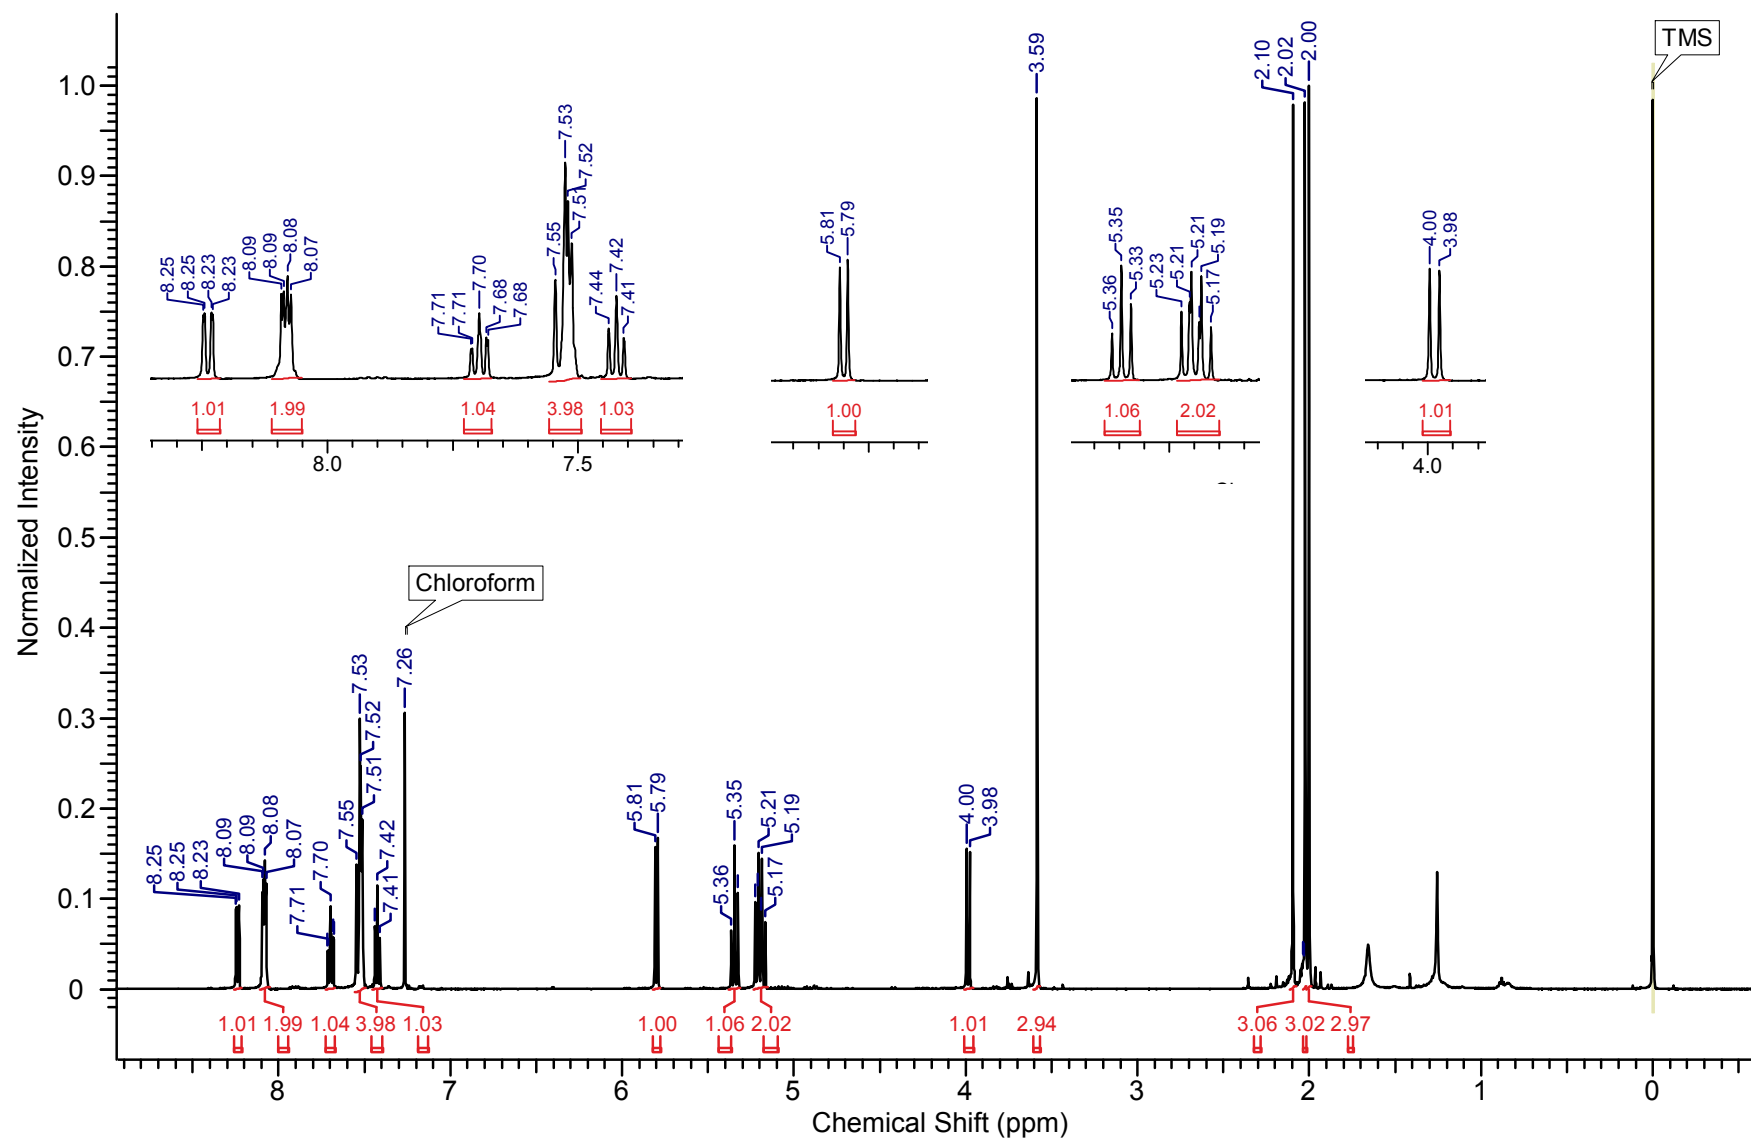

18.  $^{13}\text{C}$  NMR spectrum of  $10_a$  (125 MHz,  $\text{CDCl}_3$ )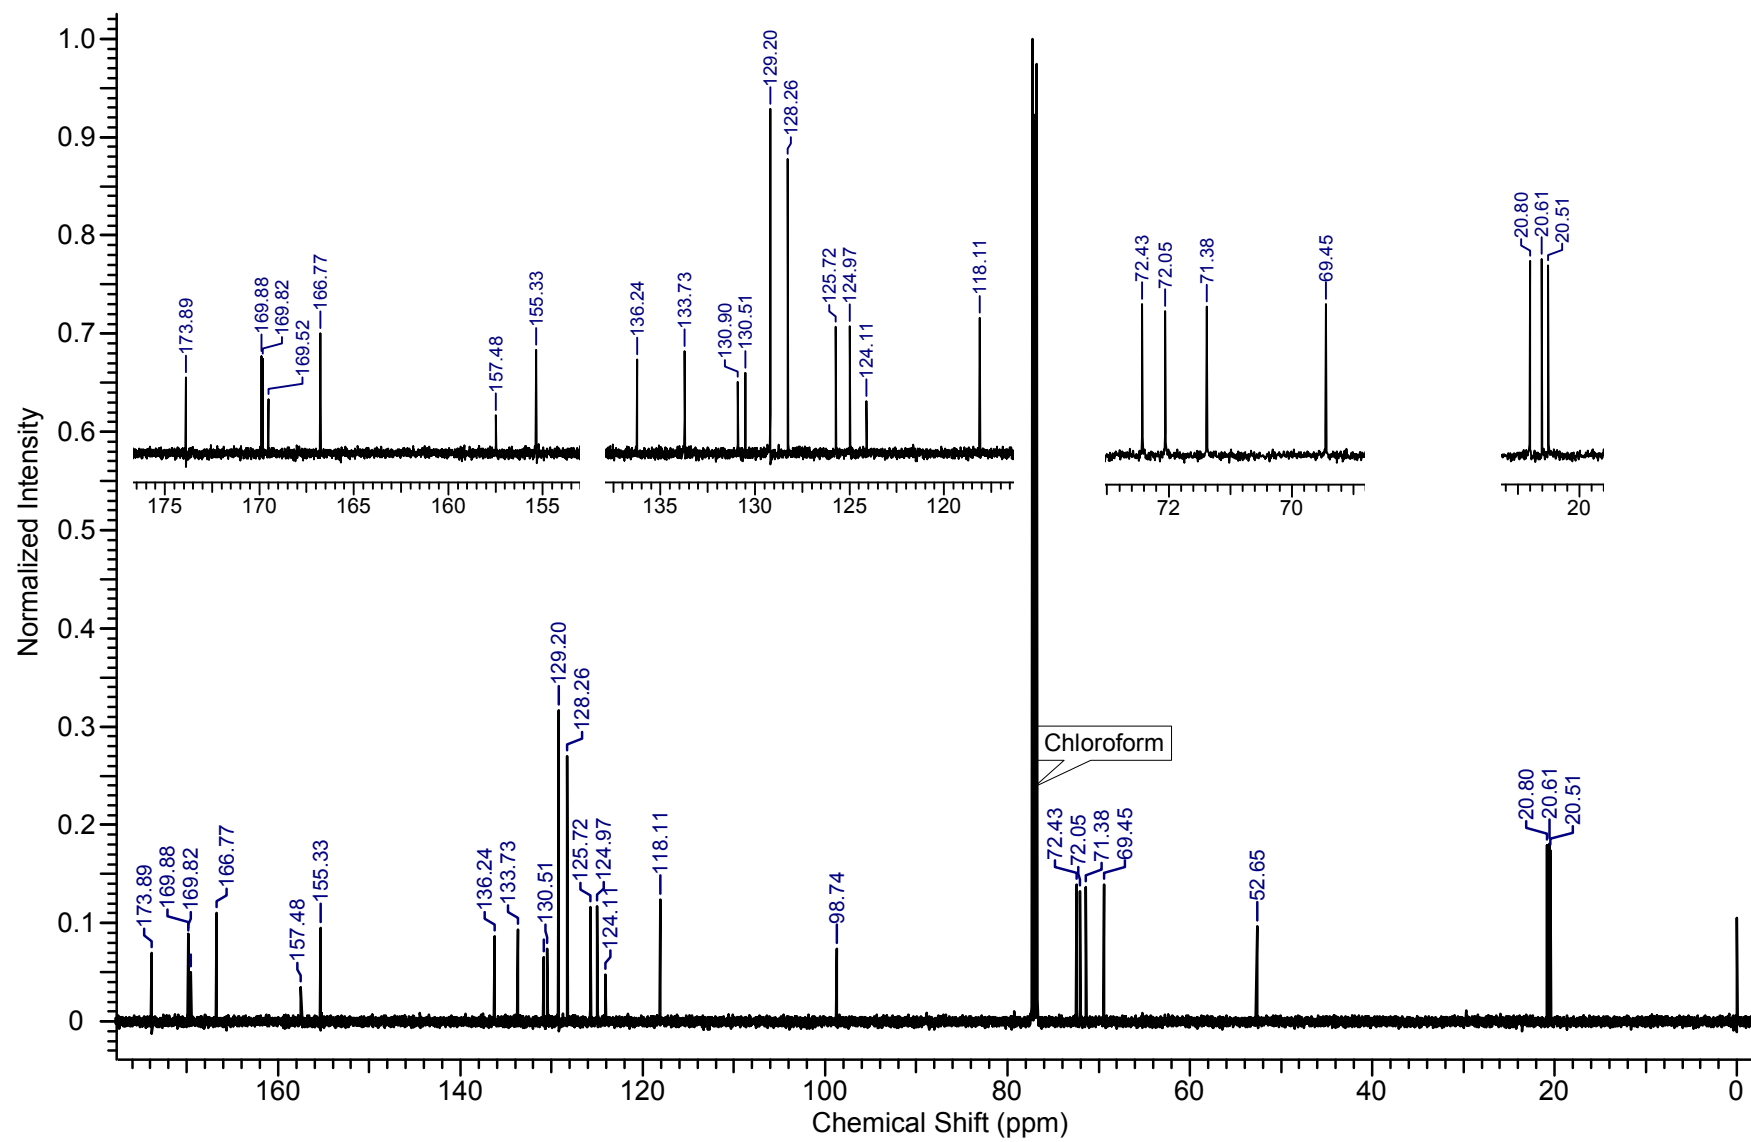

19.  $^1\text{H}$  NMR spectrum of  $10_b$  (500 MHz,  $\text{CDCl}_3$ )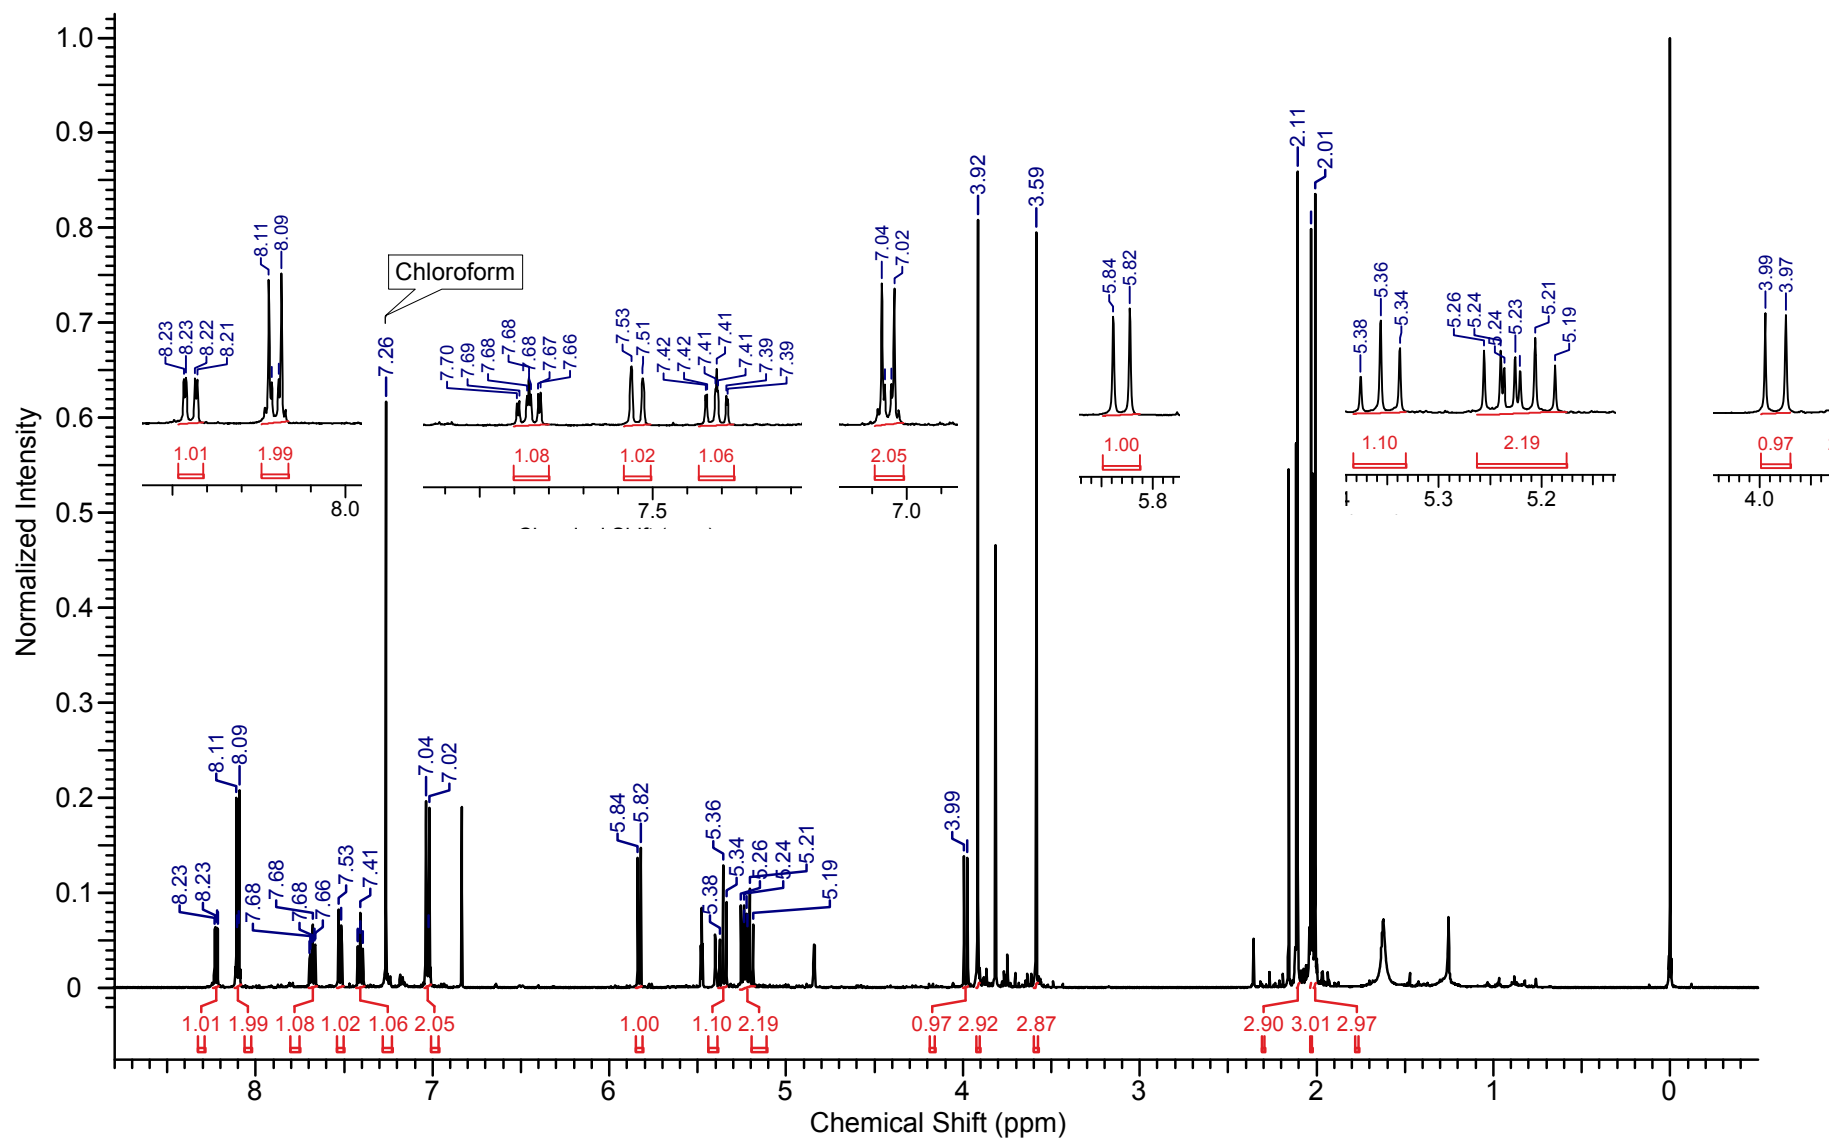



20.  $^{13}\text{C}$  NMR spectrum of  $10_b$  (125 MHz,  $\text{CDCl}_3$ )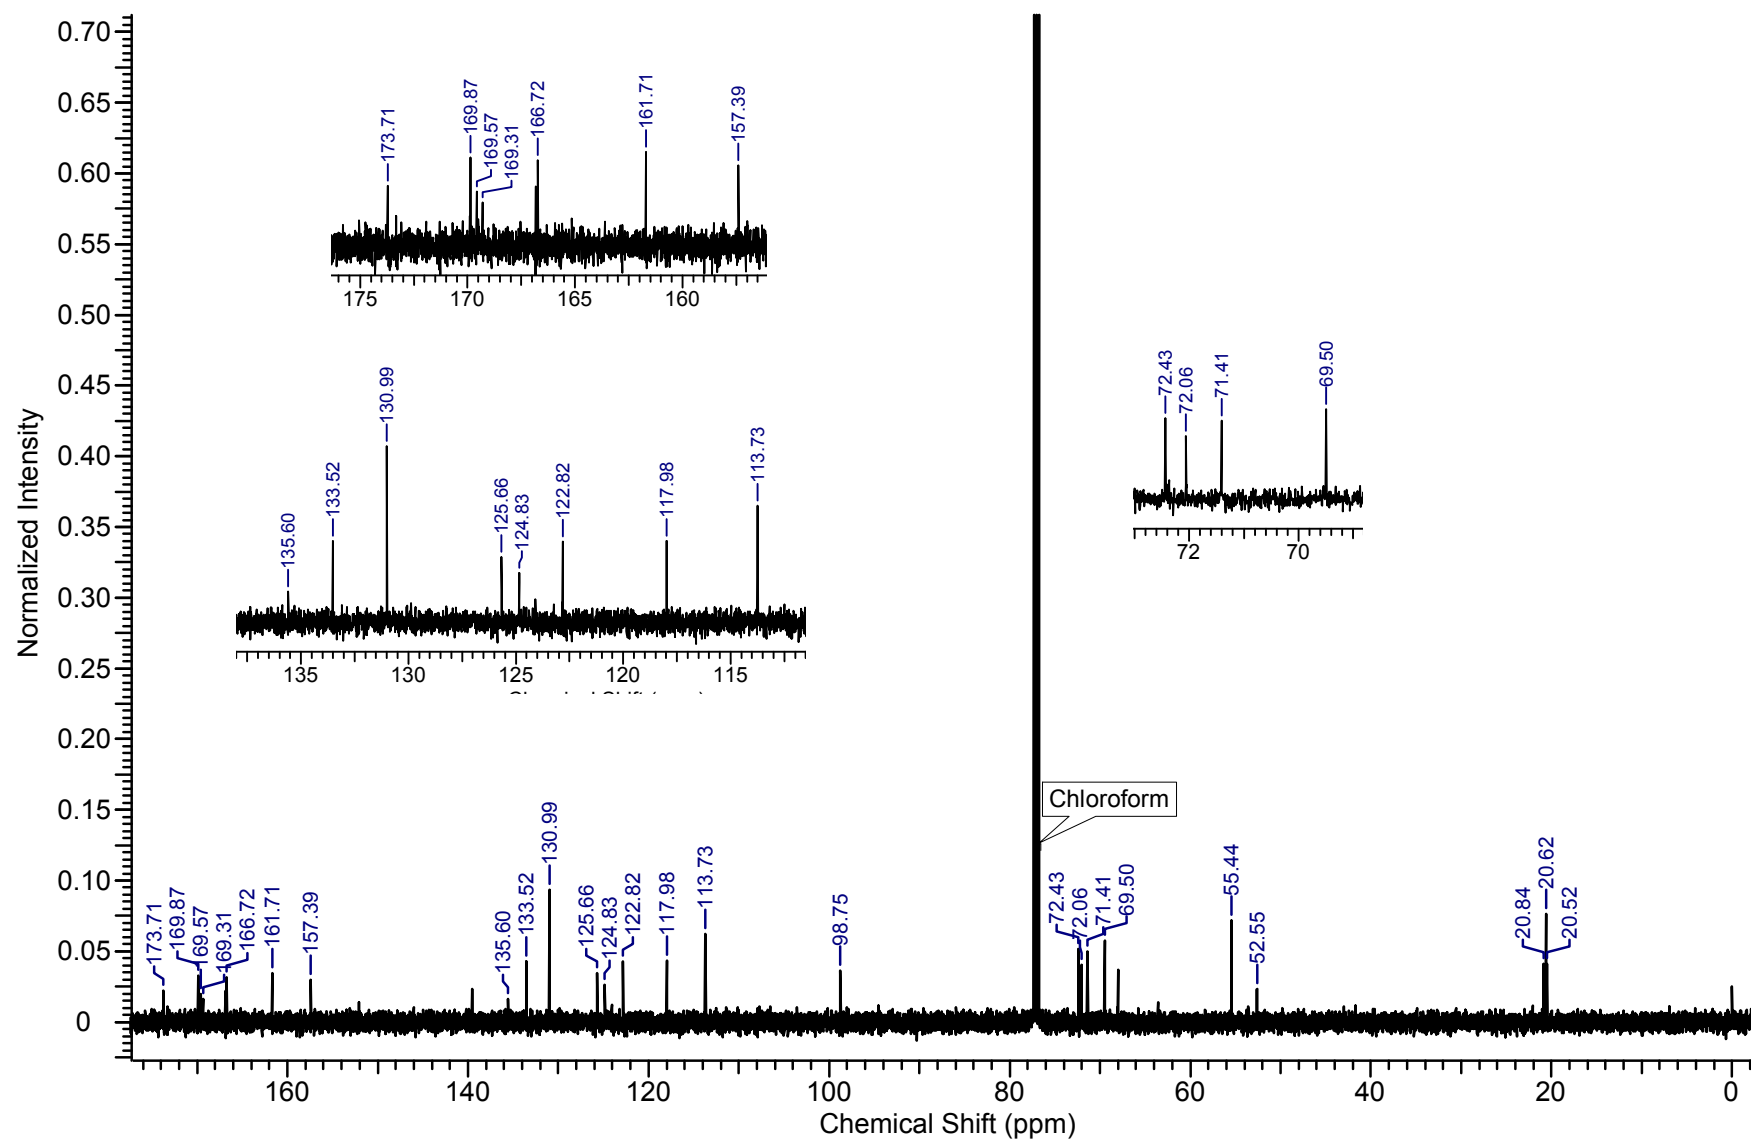

21.  $^1\text{H}$  NMR spectrum of  $10_e$  (500 MHz,  $\text{CDCl}_3$ )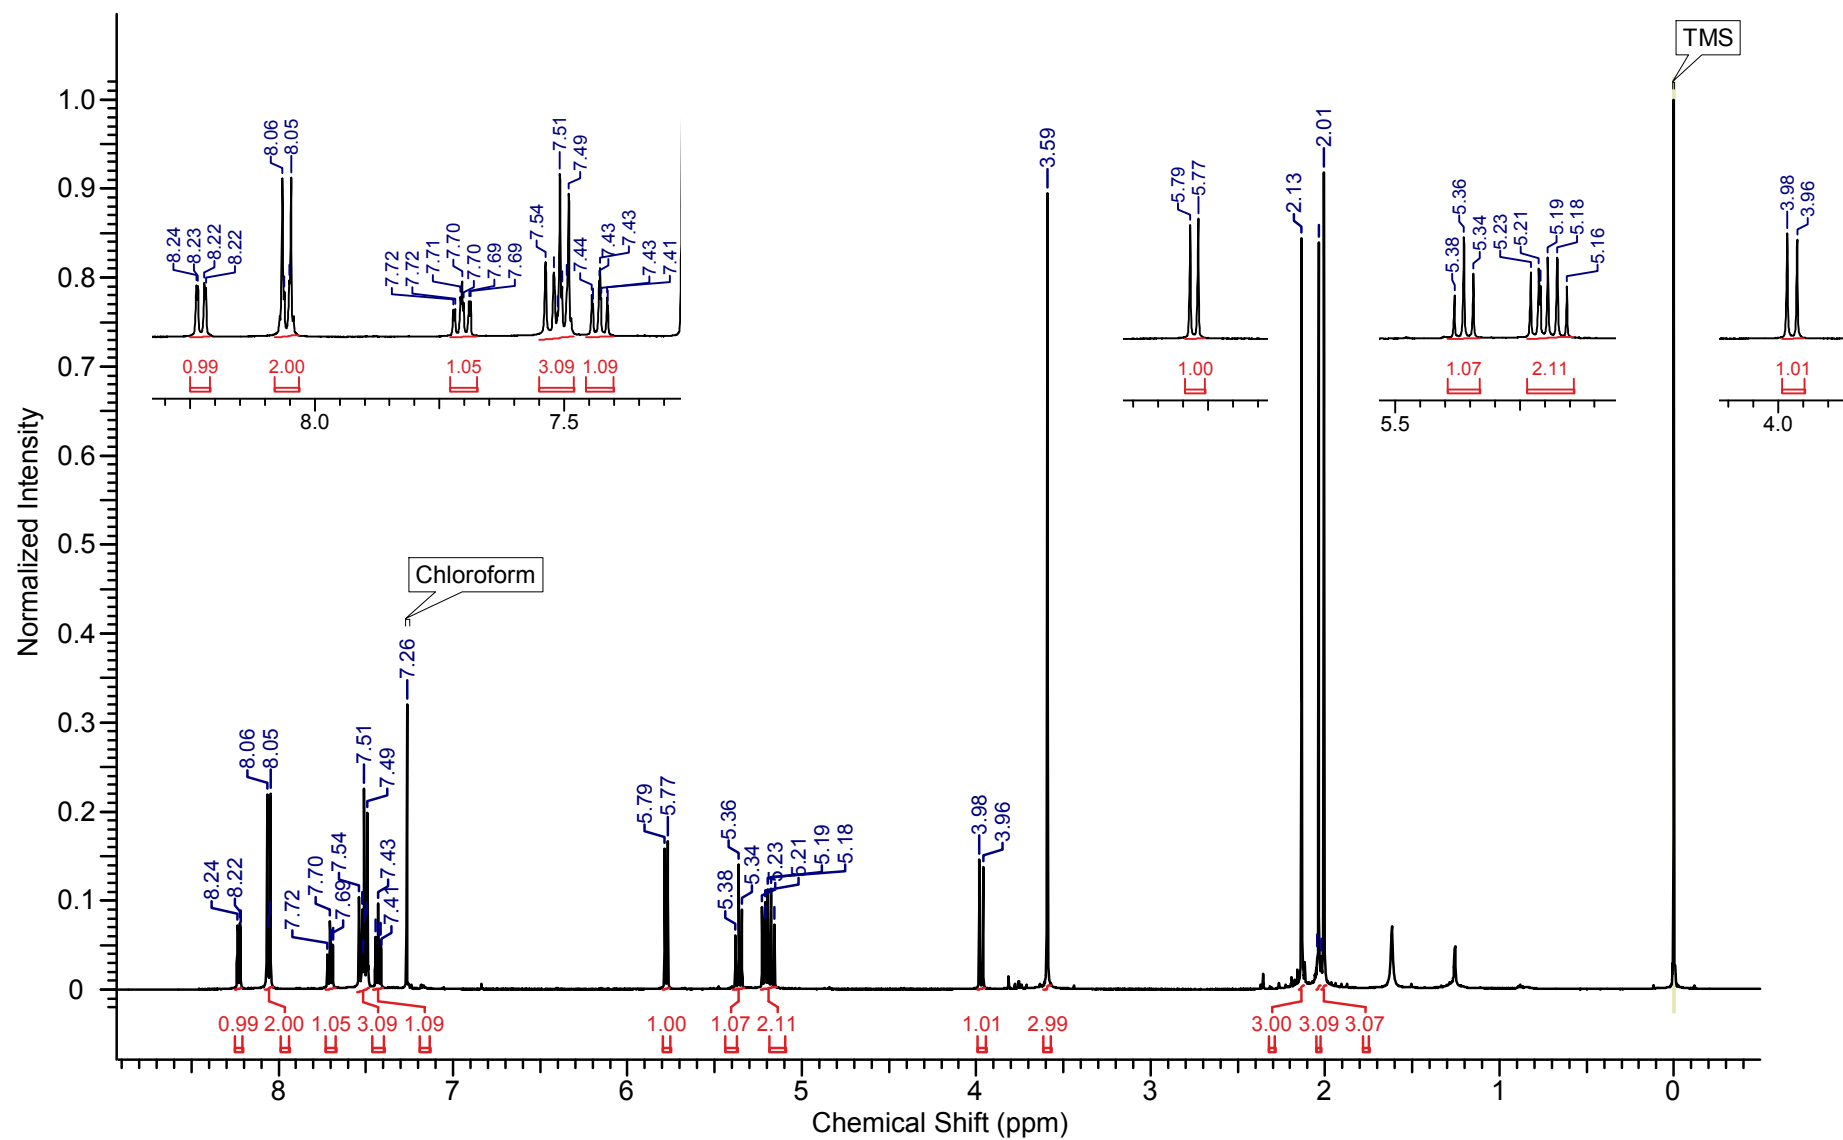

22.  $^{13}\text{C}$  NMR spectrum of  $10_e$  (125 MHz,  $\text{CDCl}_3$ )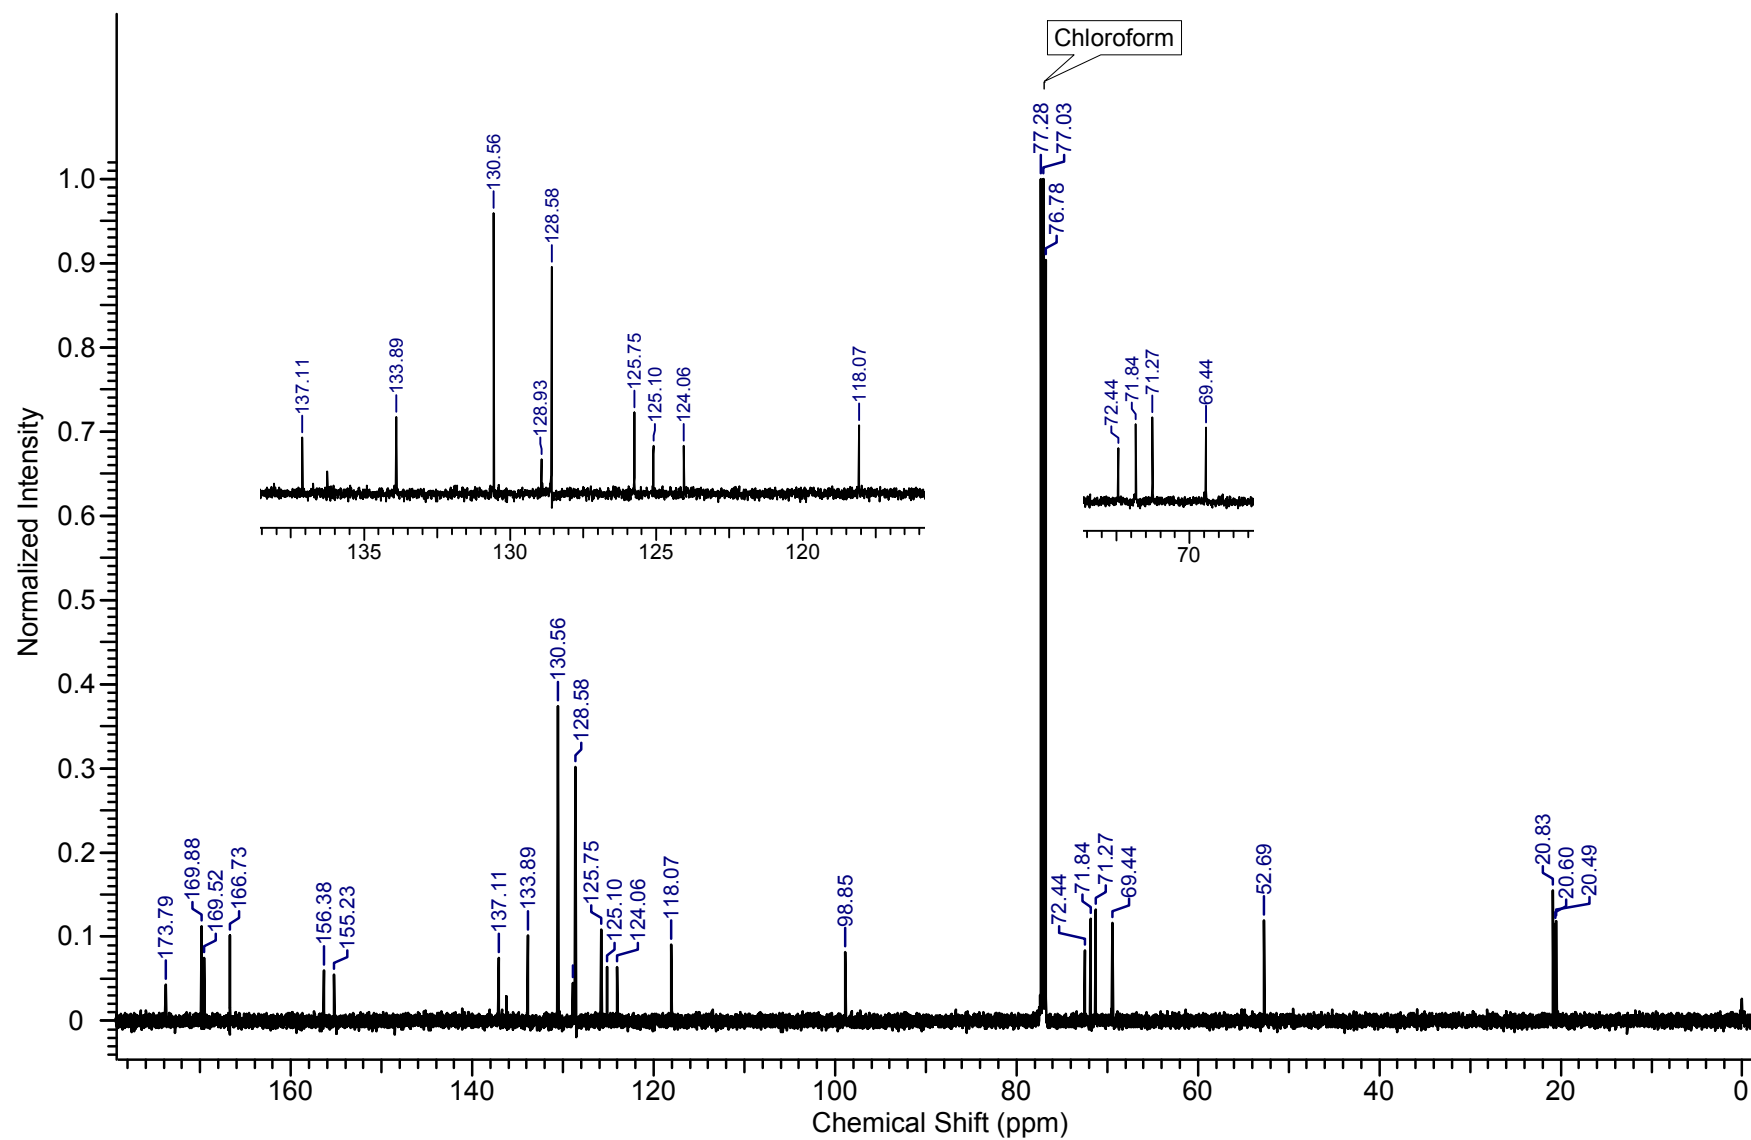

23.  $^1\text{H}$  NMR spectrum of **11<sub>b</sub>** (500 MHz,  $\text{DMSO-d}_6$ )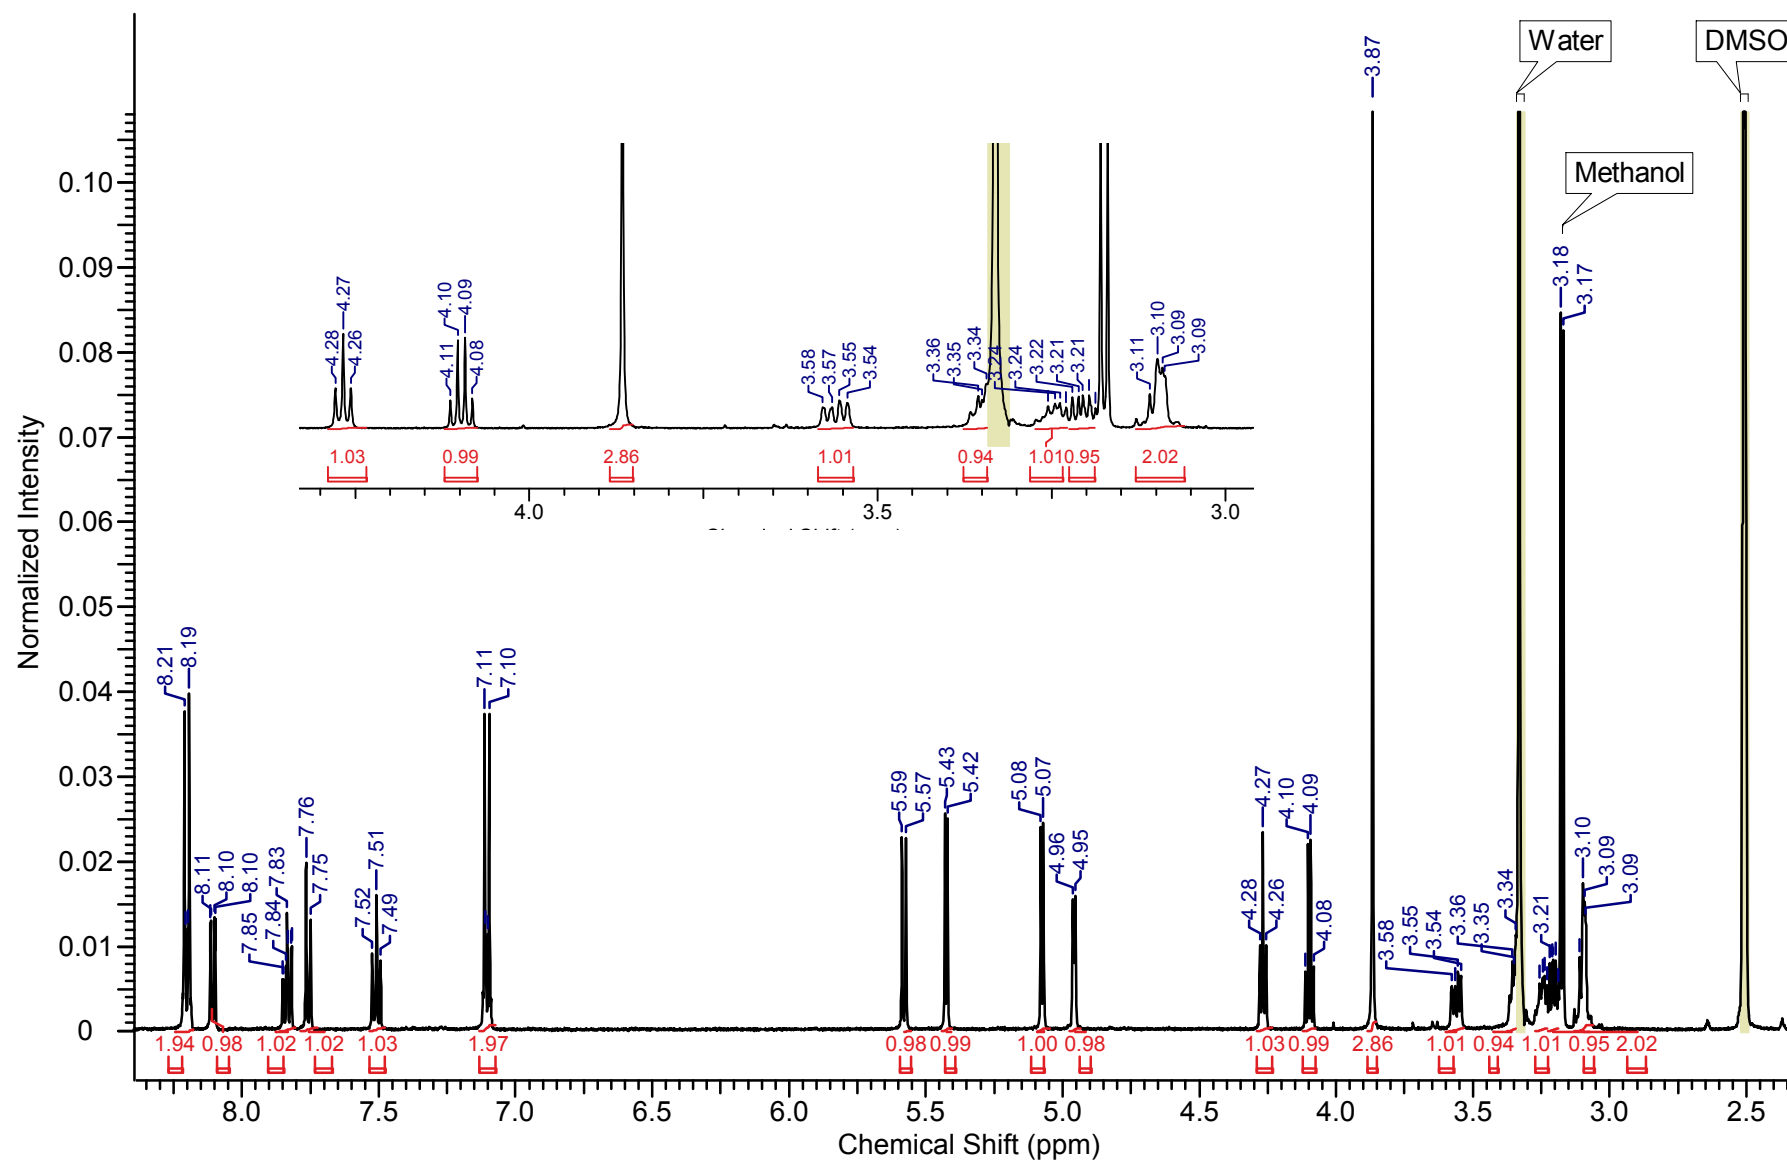

24.  $^{13}\text{C}$  NMR spectrum of 11<sub>b</sub> (125 MHz, DMSO- $d_6$ )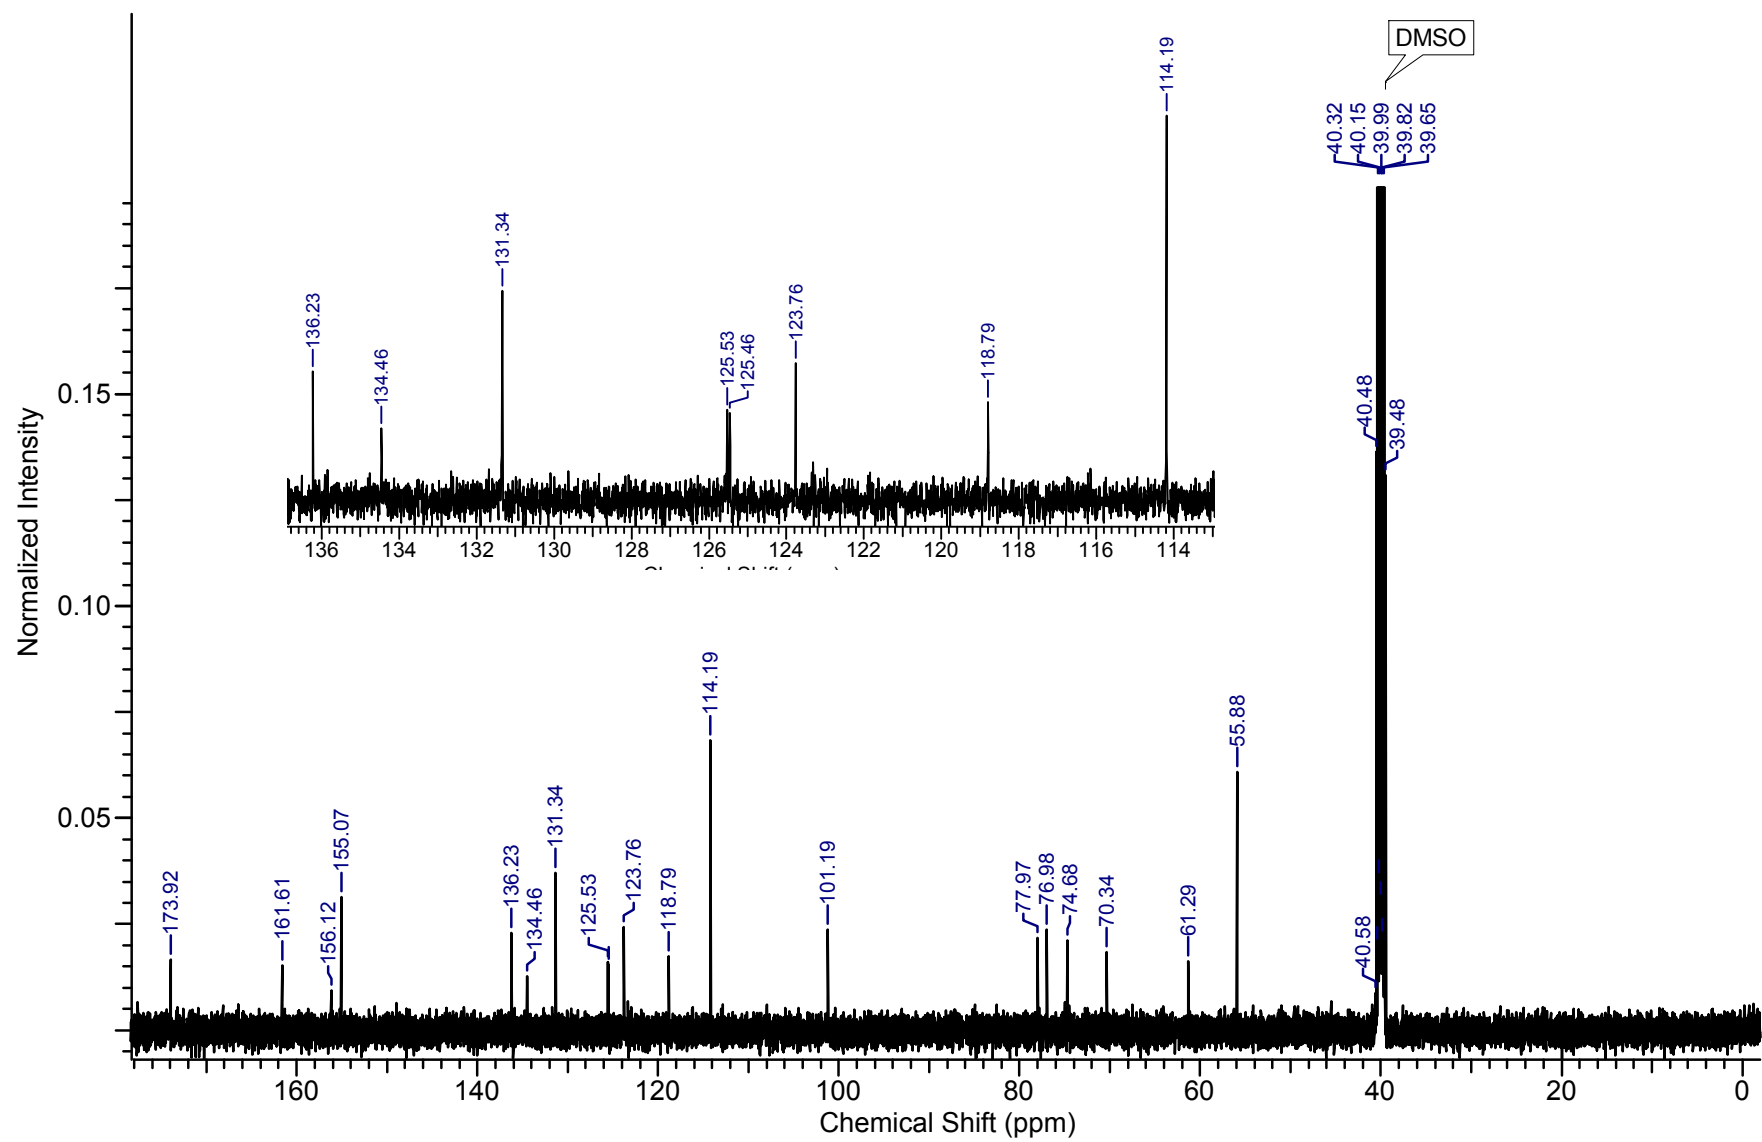

25.  $^1\text{H}$  NMR spectrum of  $11_f$  (500 MHz,  $\text{DMSO-d}_6$ )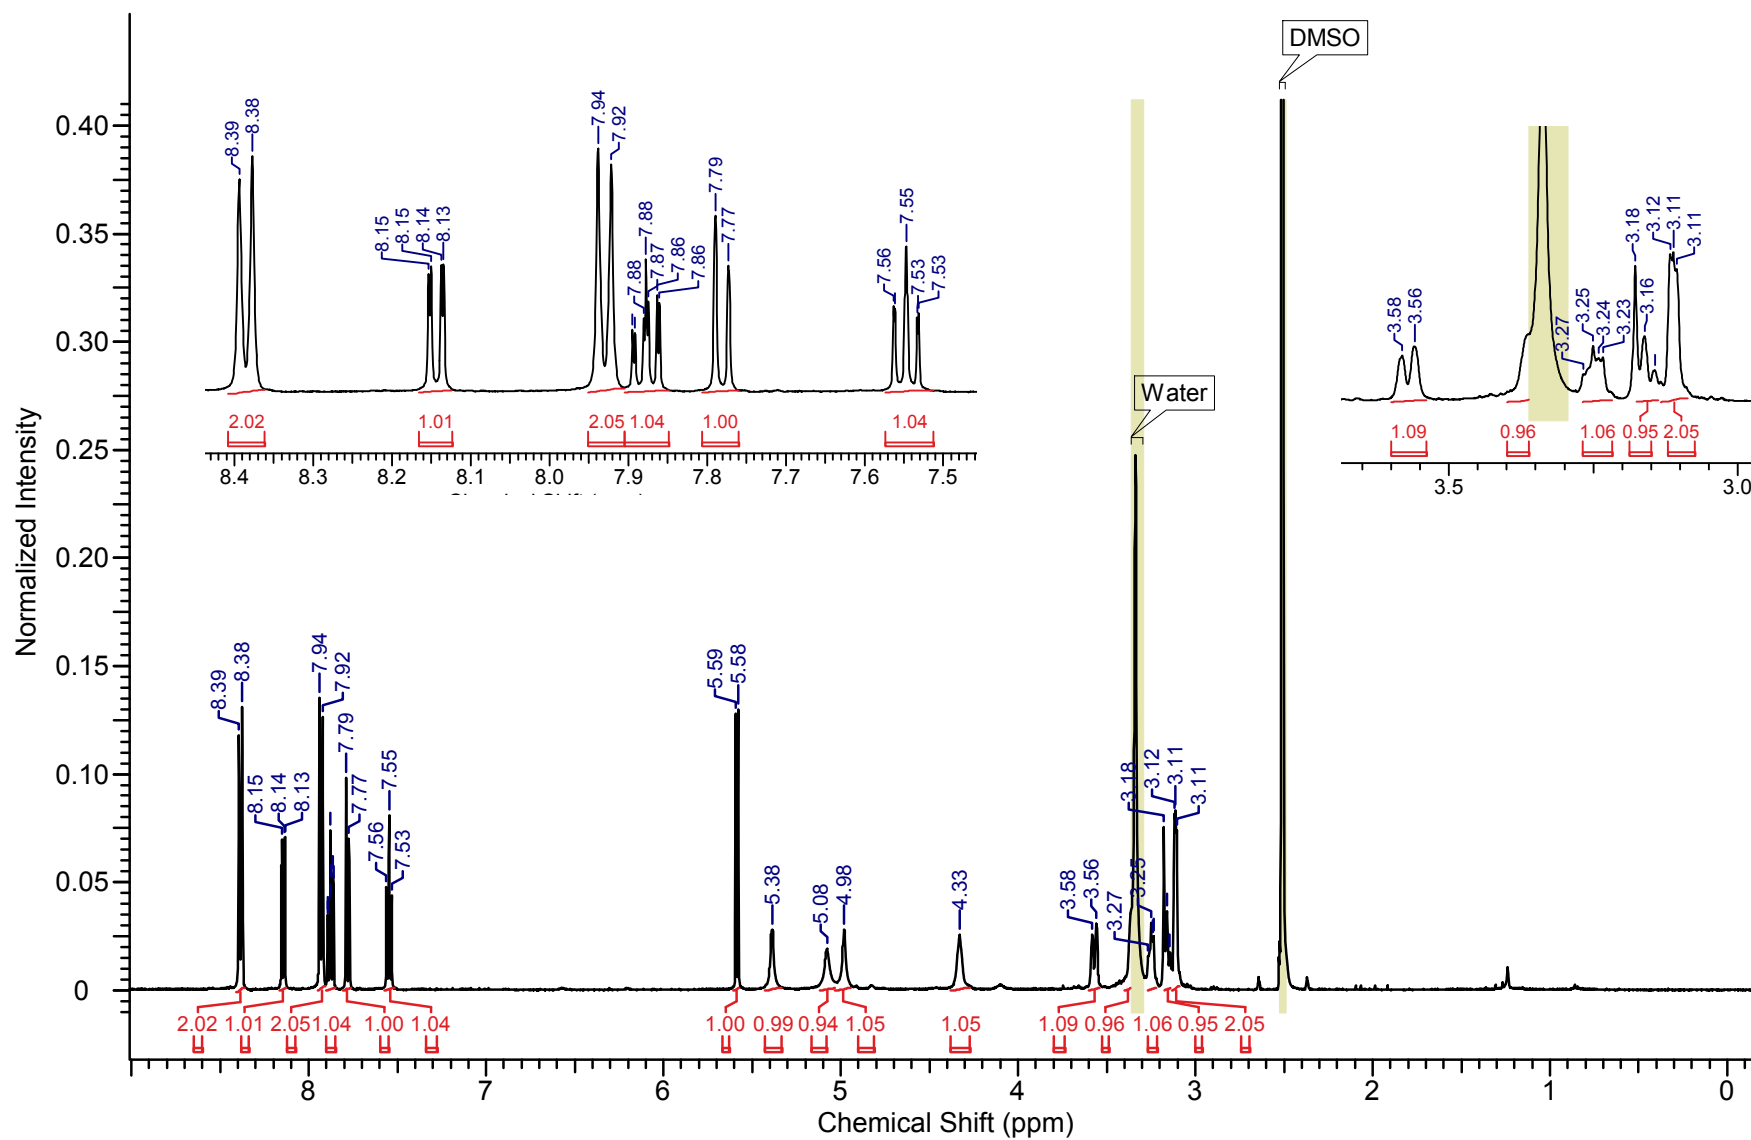

26.  $^{13}\text{C}$  NMR spectrum of  $11_f$  (125 MHz,  $\text{DMSO-d}_6$ )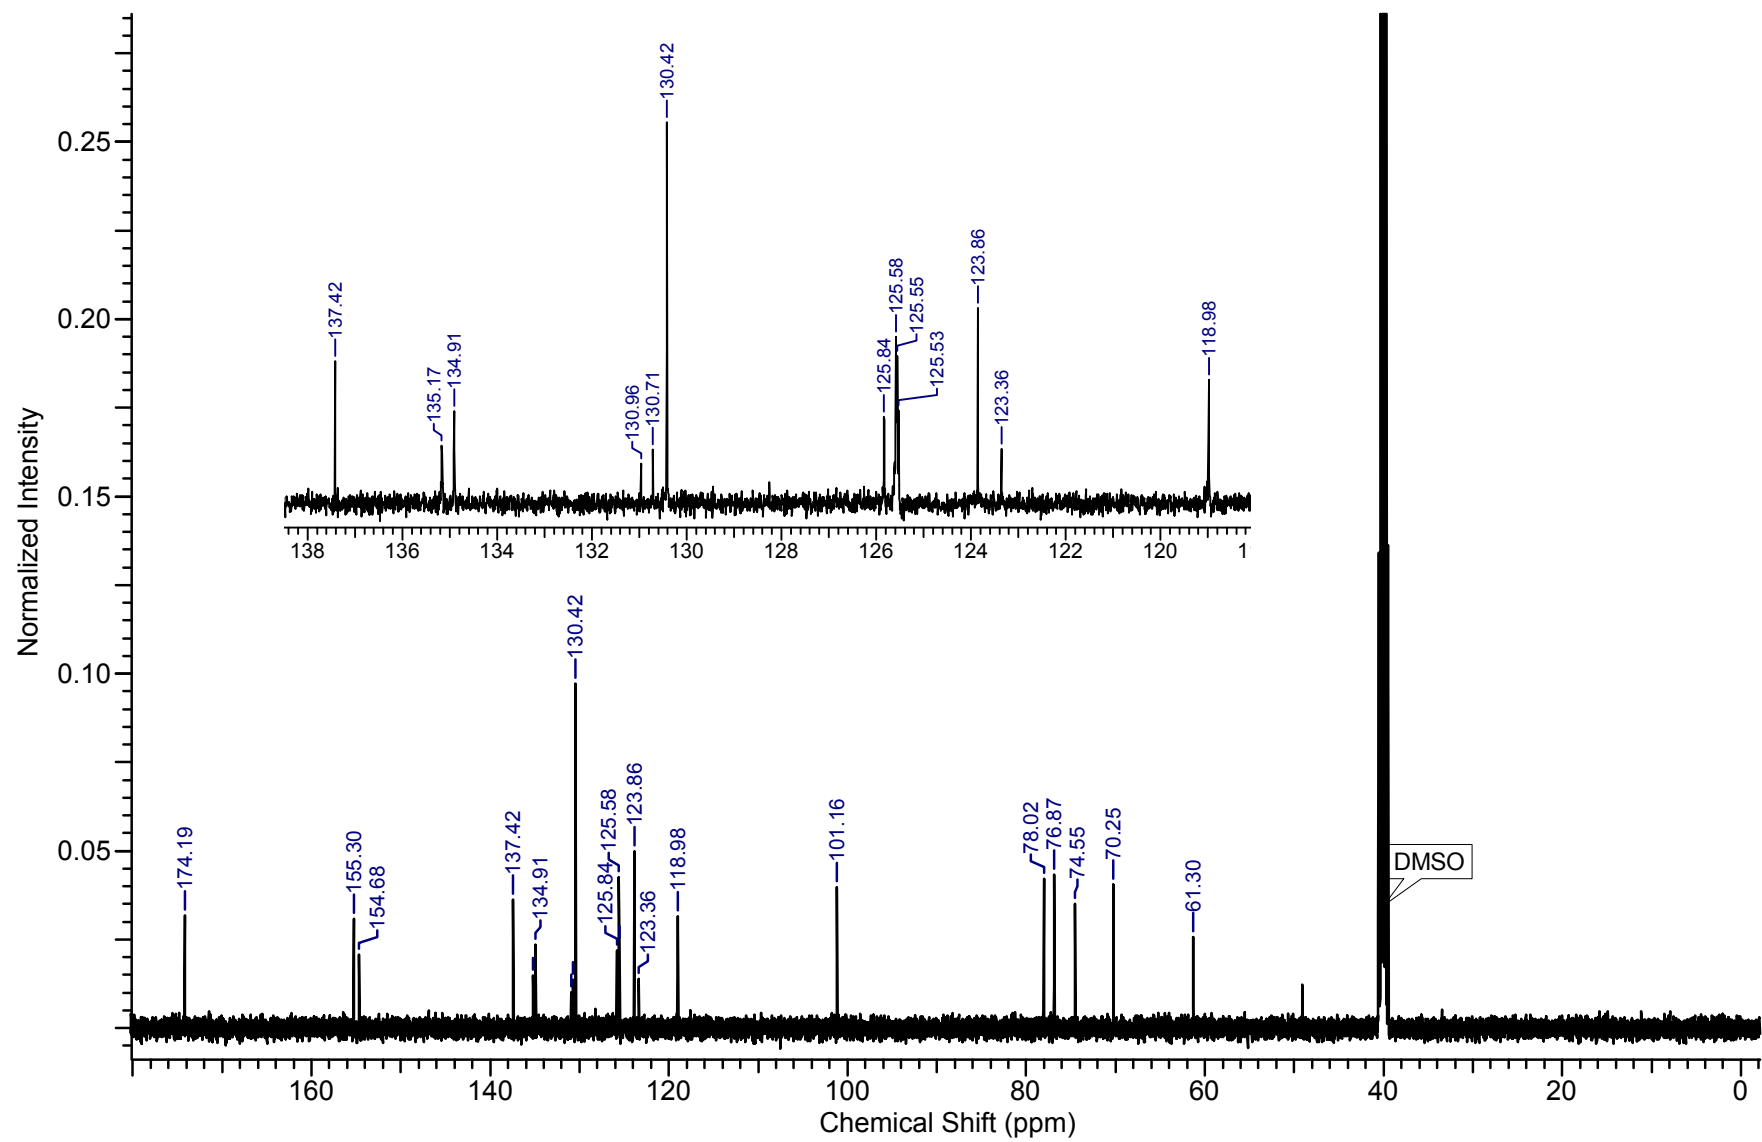

27.  $^1\text{H}$  NMR spectrum of  $12_a$  (500 MHz,  $\text{DMSO-d}_6$ )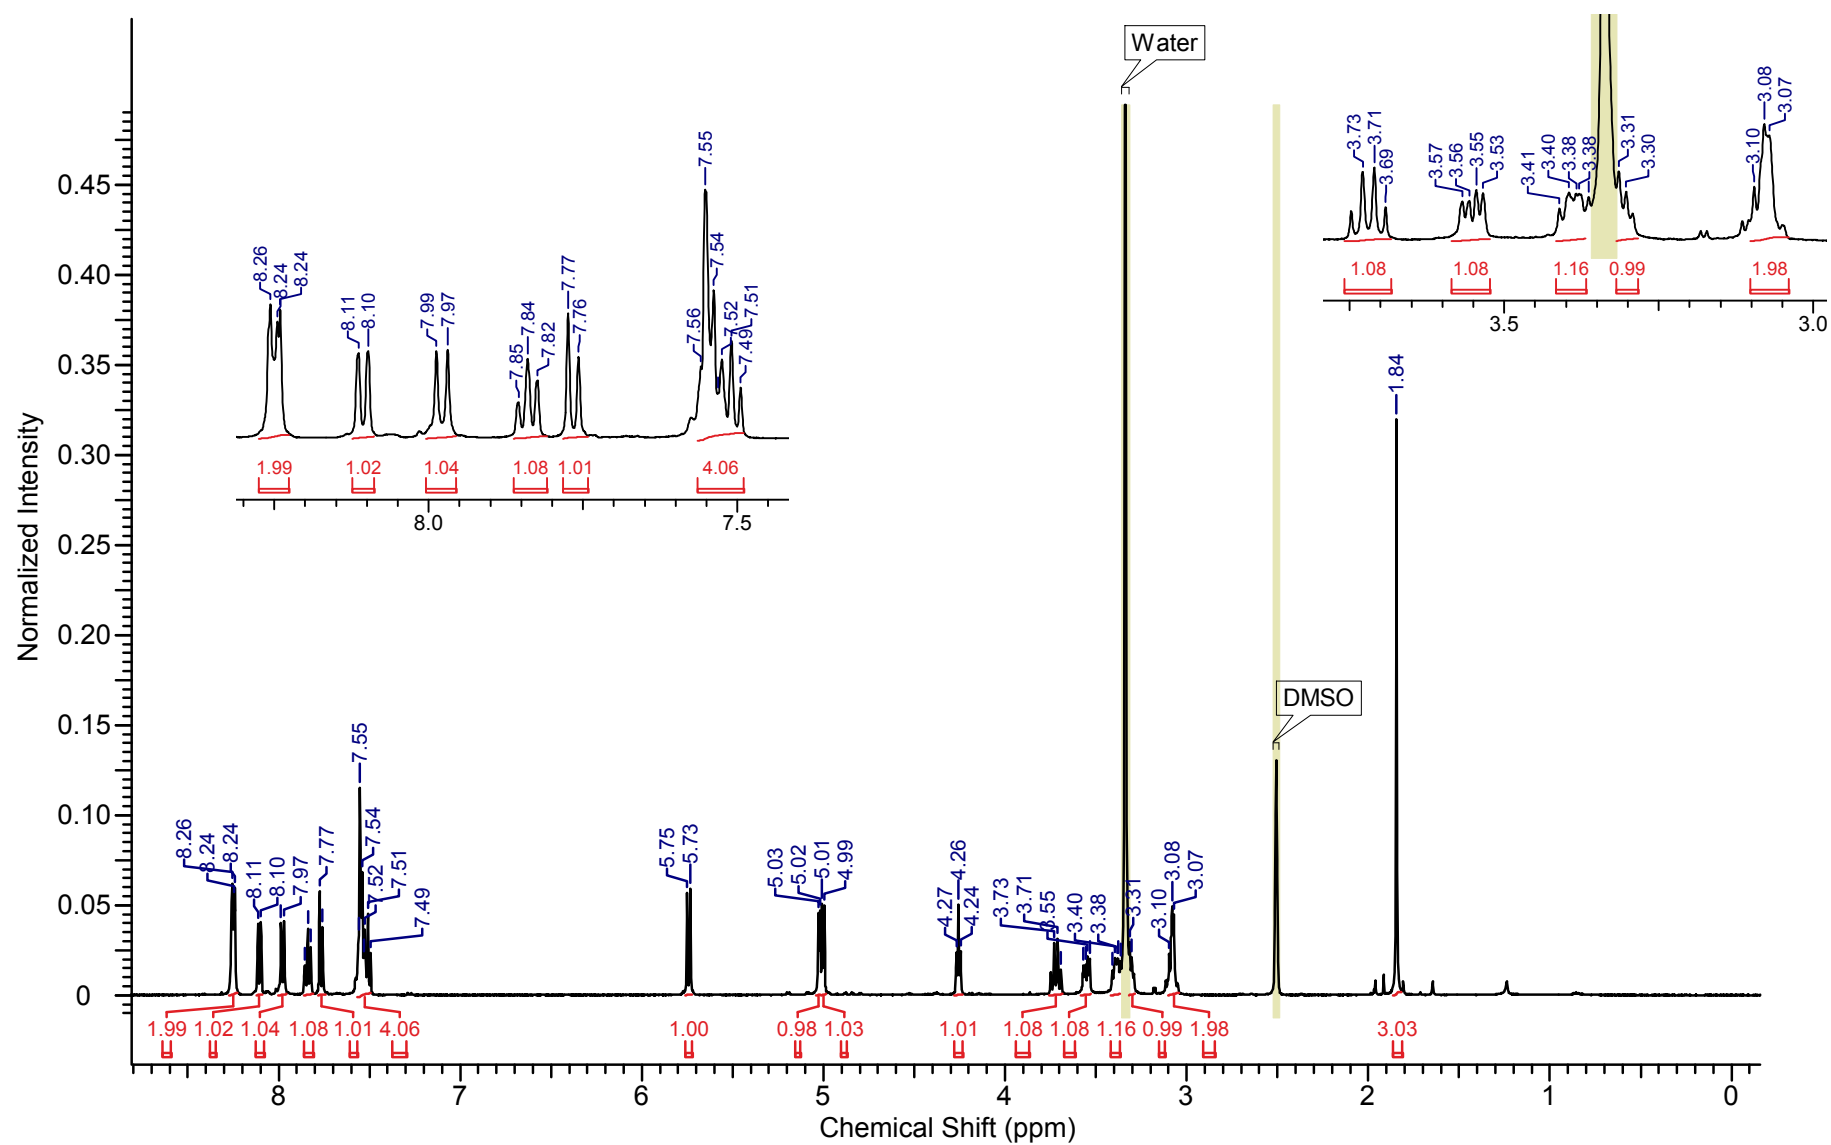



28.  $^{13}\text{C}$  NMR spectrum of 12<sub>a</sub> (125 MHz, DMSO-d<sub>6</sub>)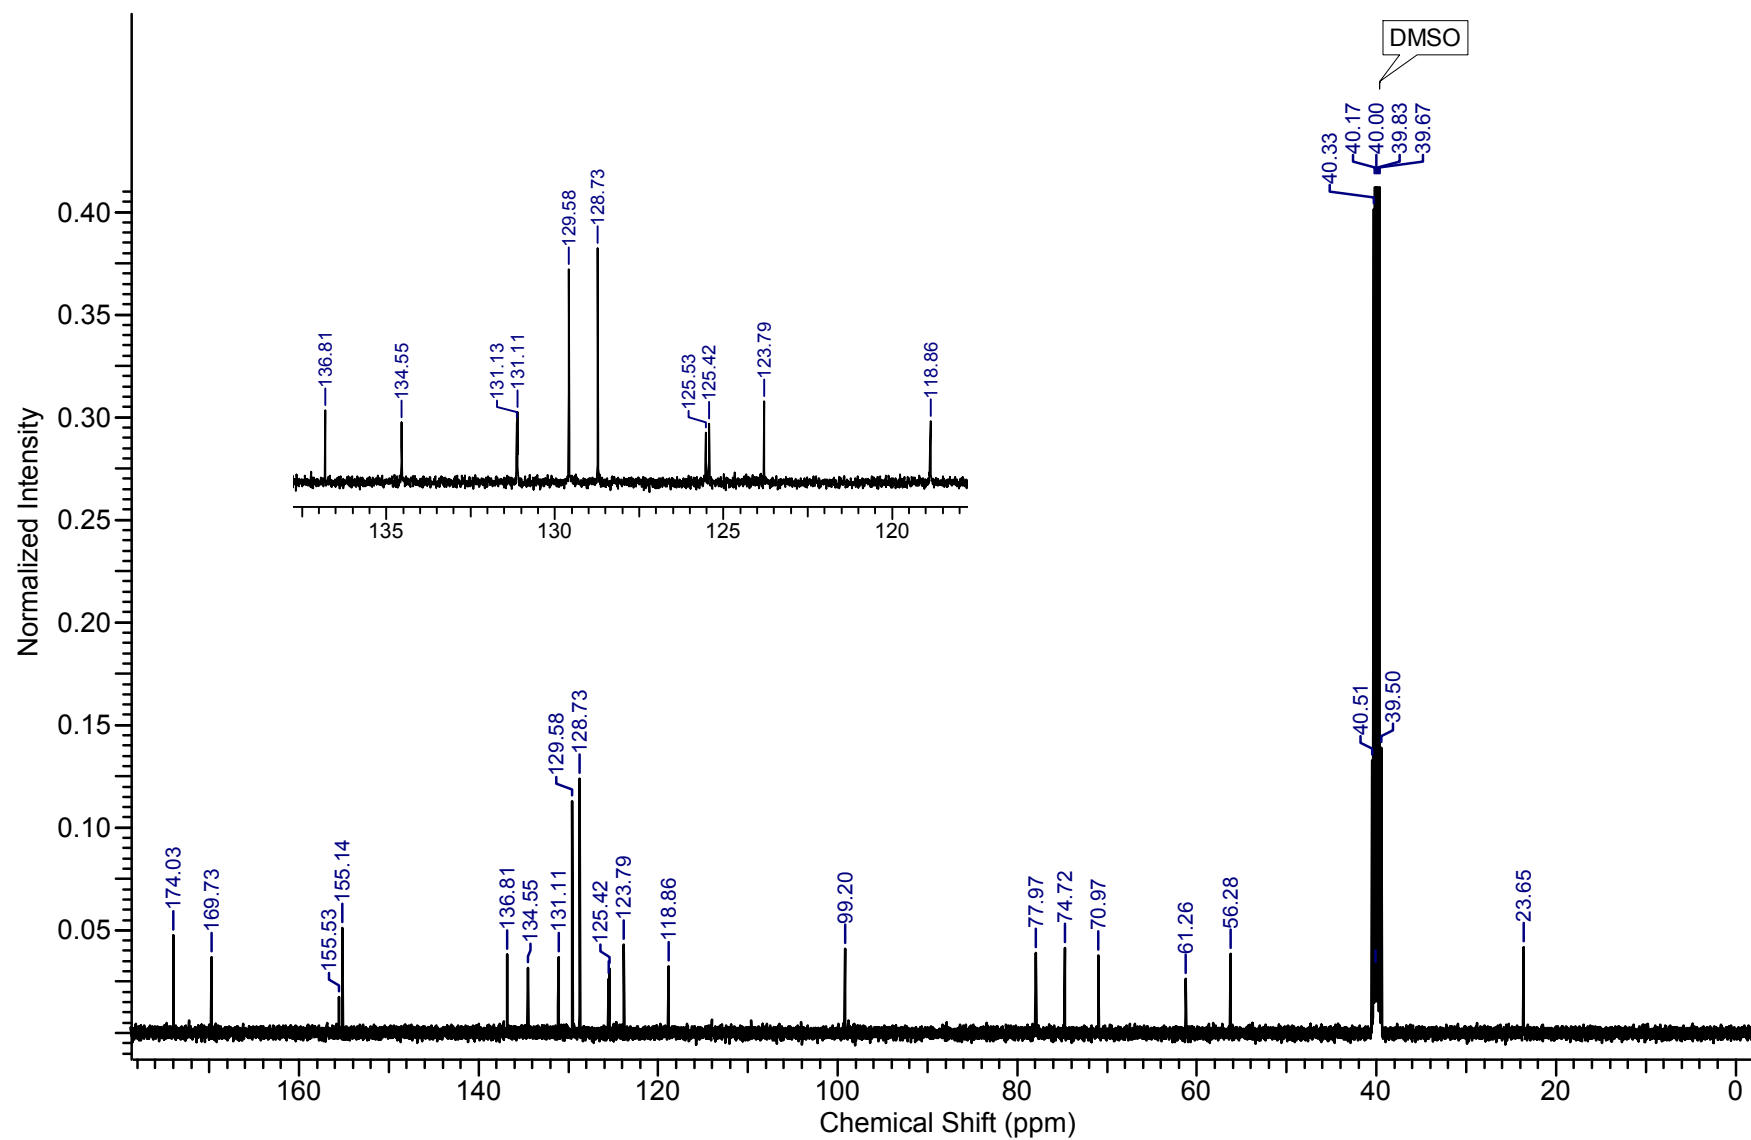

29.  $^1\text{H}$  NMR spectrum of **12<sub>b</sub>** (500 MHz,  $\text{DMSO-d}_6$ )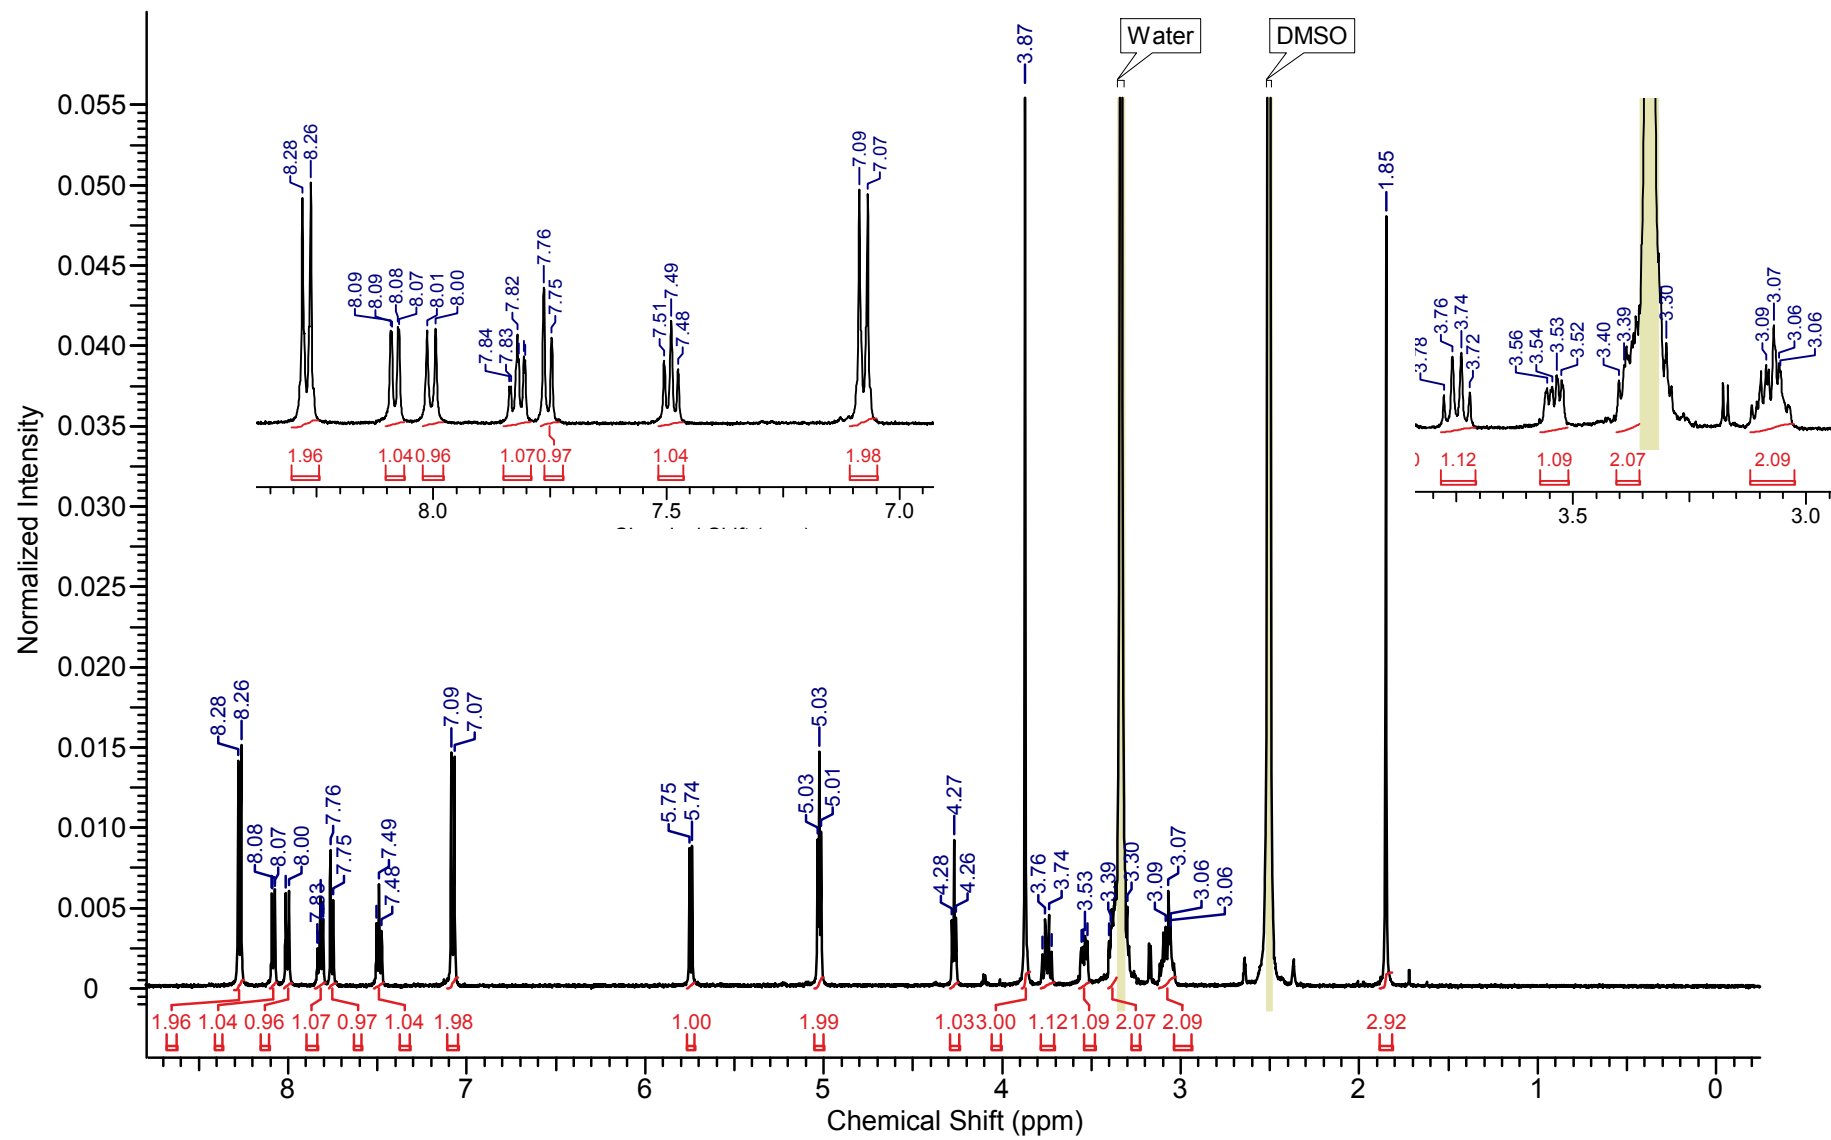

30.  $^{13}\text{C}$  NMR spectrum of 12<sub>b</sub> (125 MHz, DMSO- $d_6$ )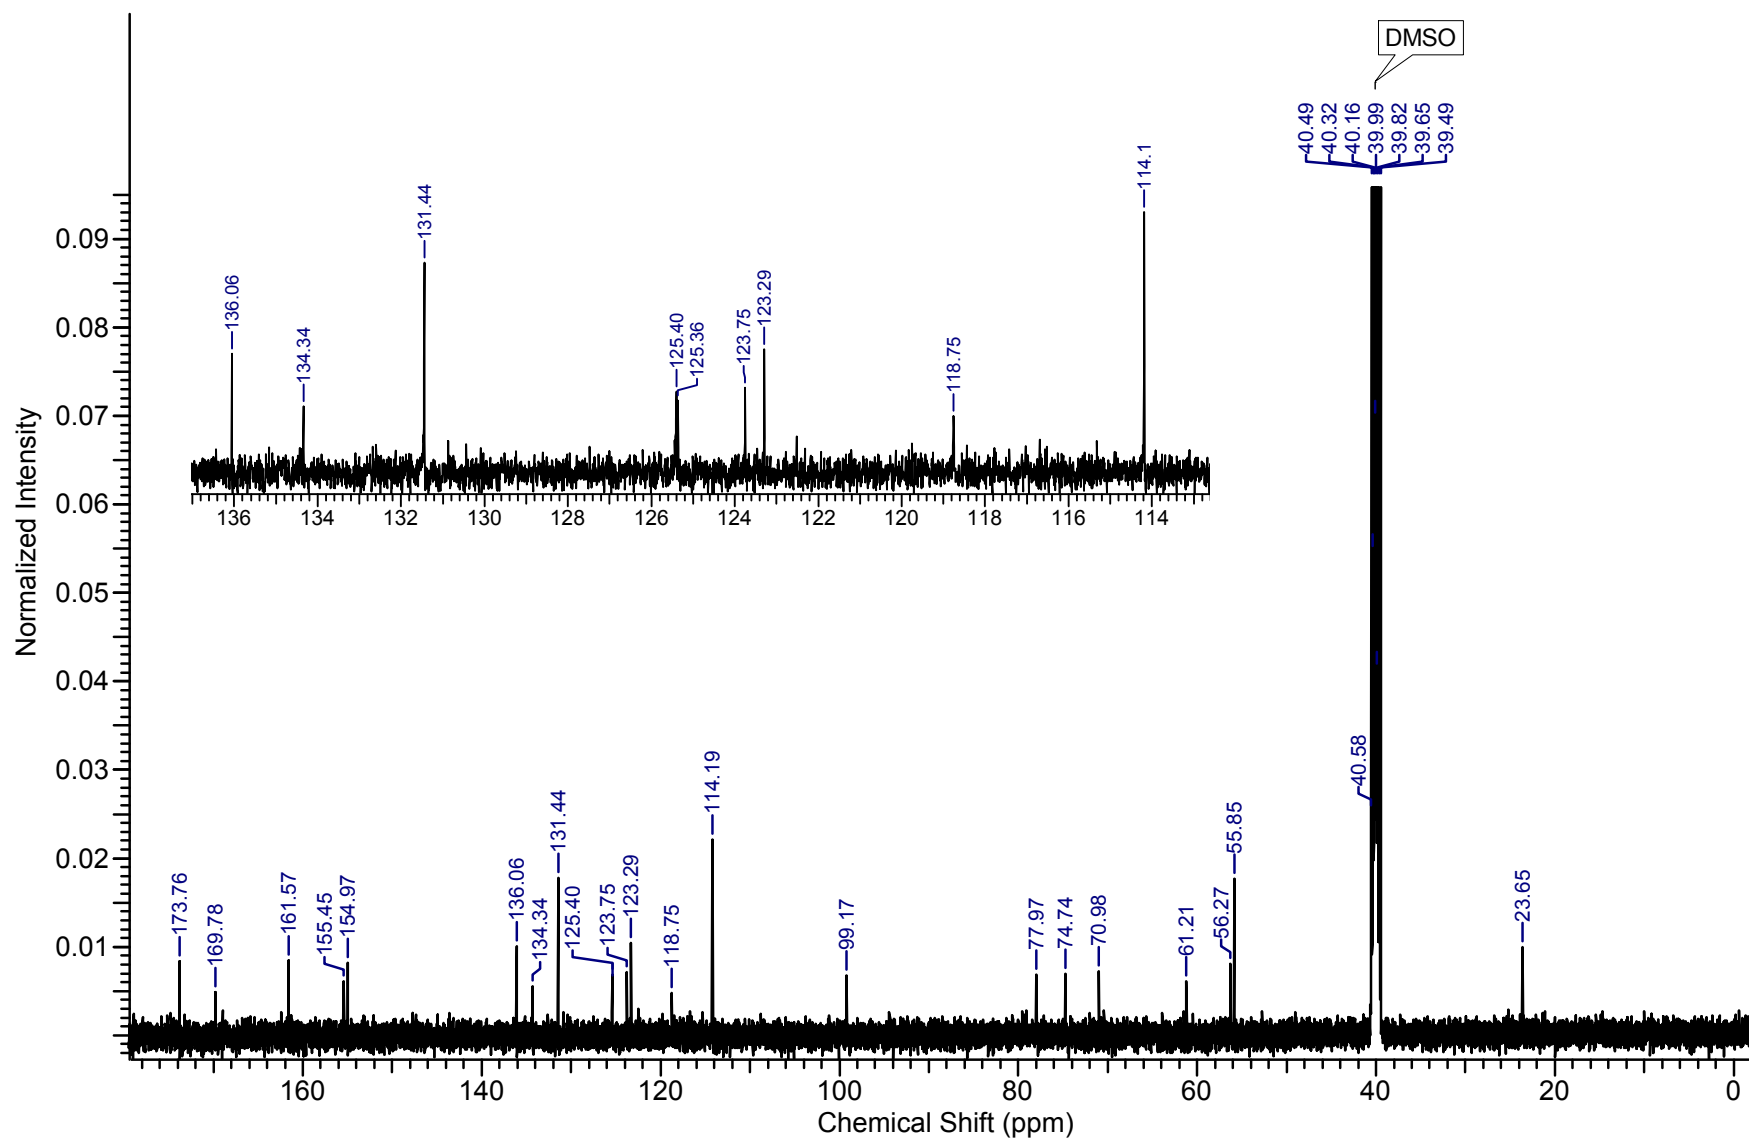

31.  $^1\text{H}$  NMR spectrum of  $12_e$  (500 MHz,  $\text{DMSO-d}_6$ )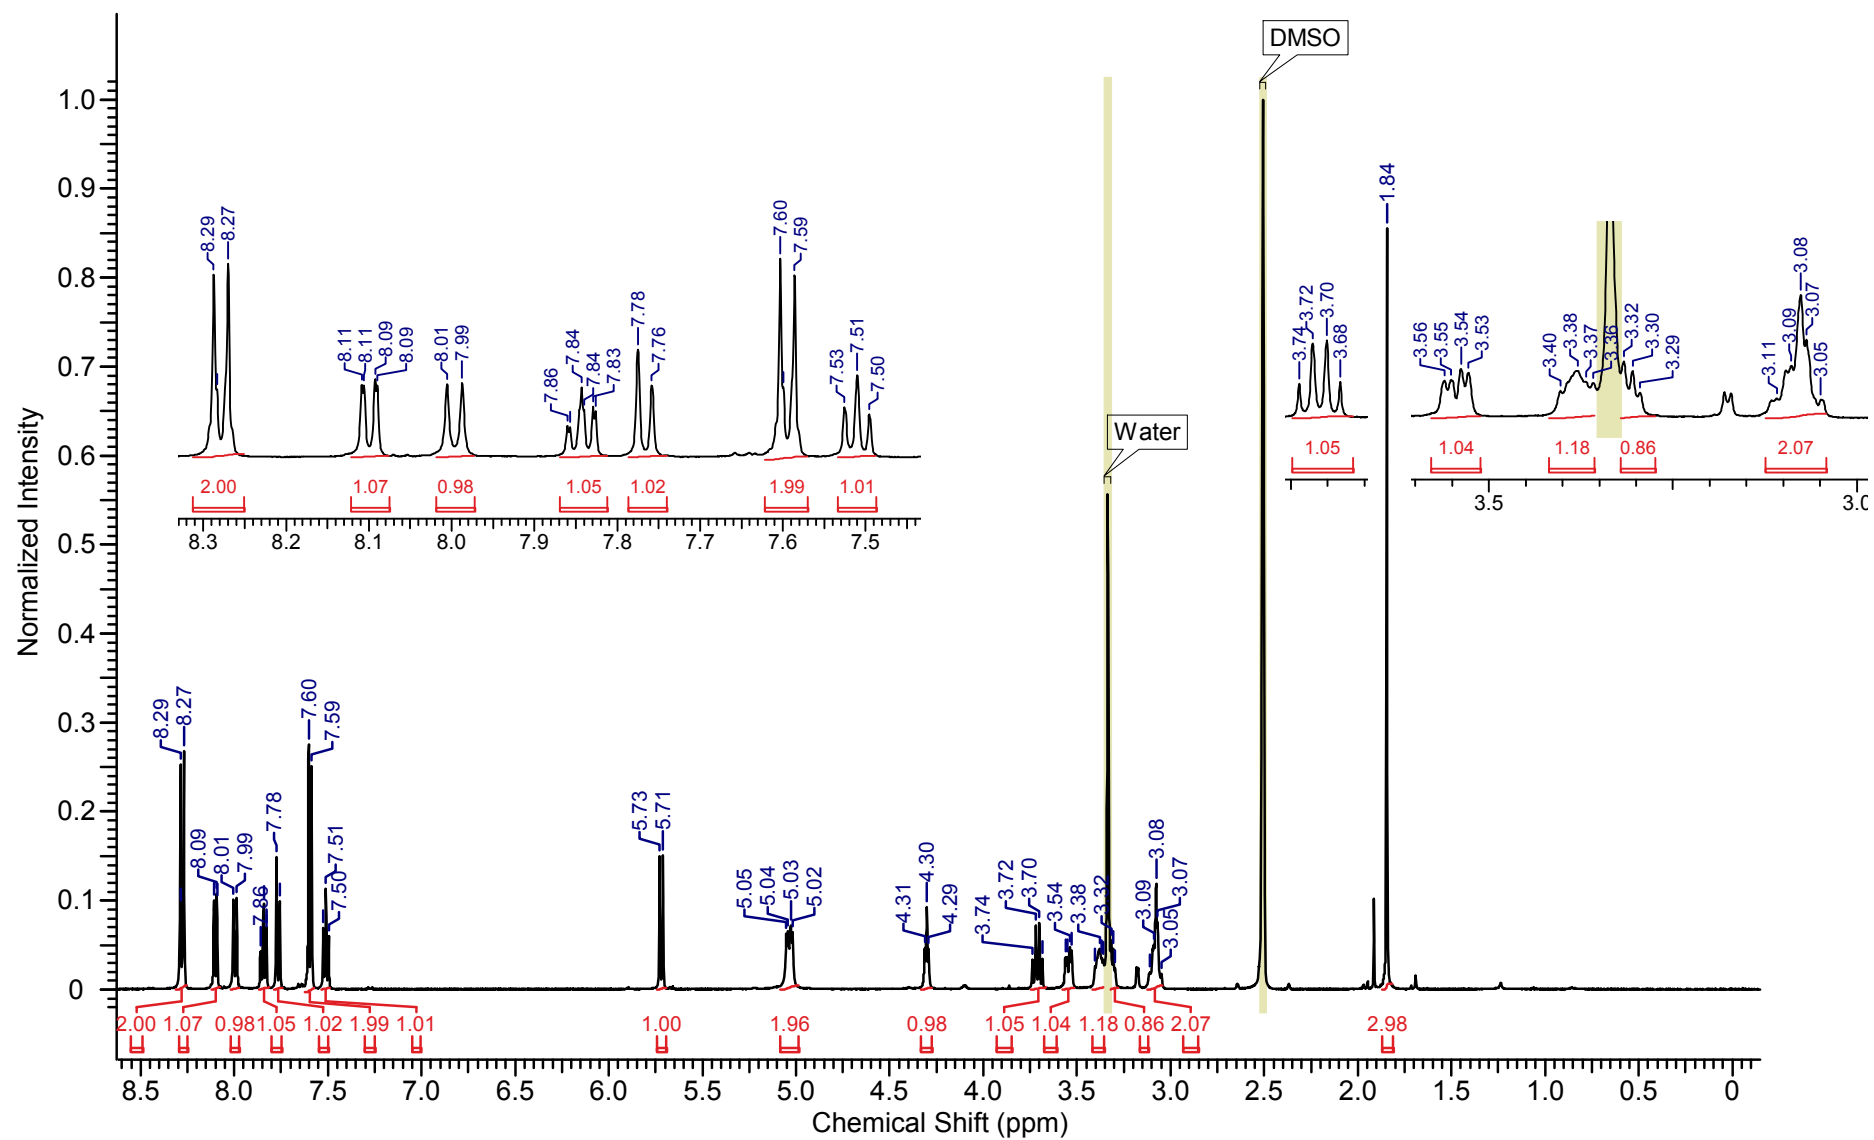

32.  $^{13}\text{C}$  NMR spectrum of  $12_e$  (125 MHz,  $\text{DMSO-d}_6$ )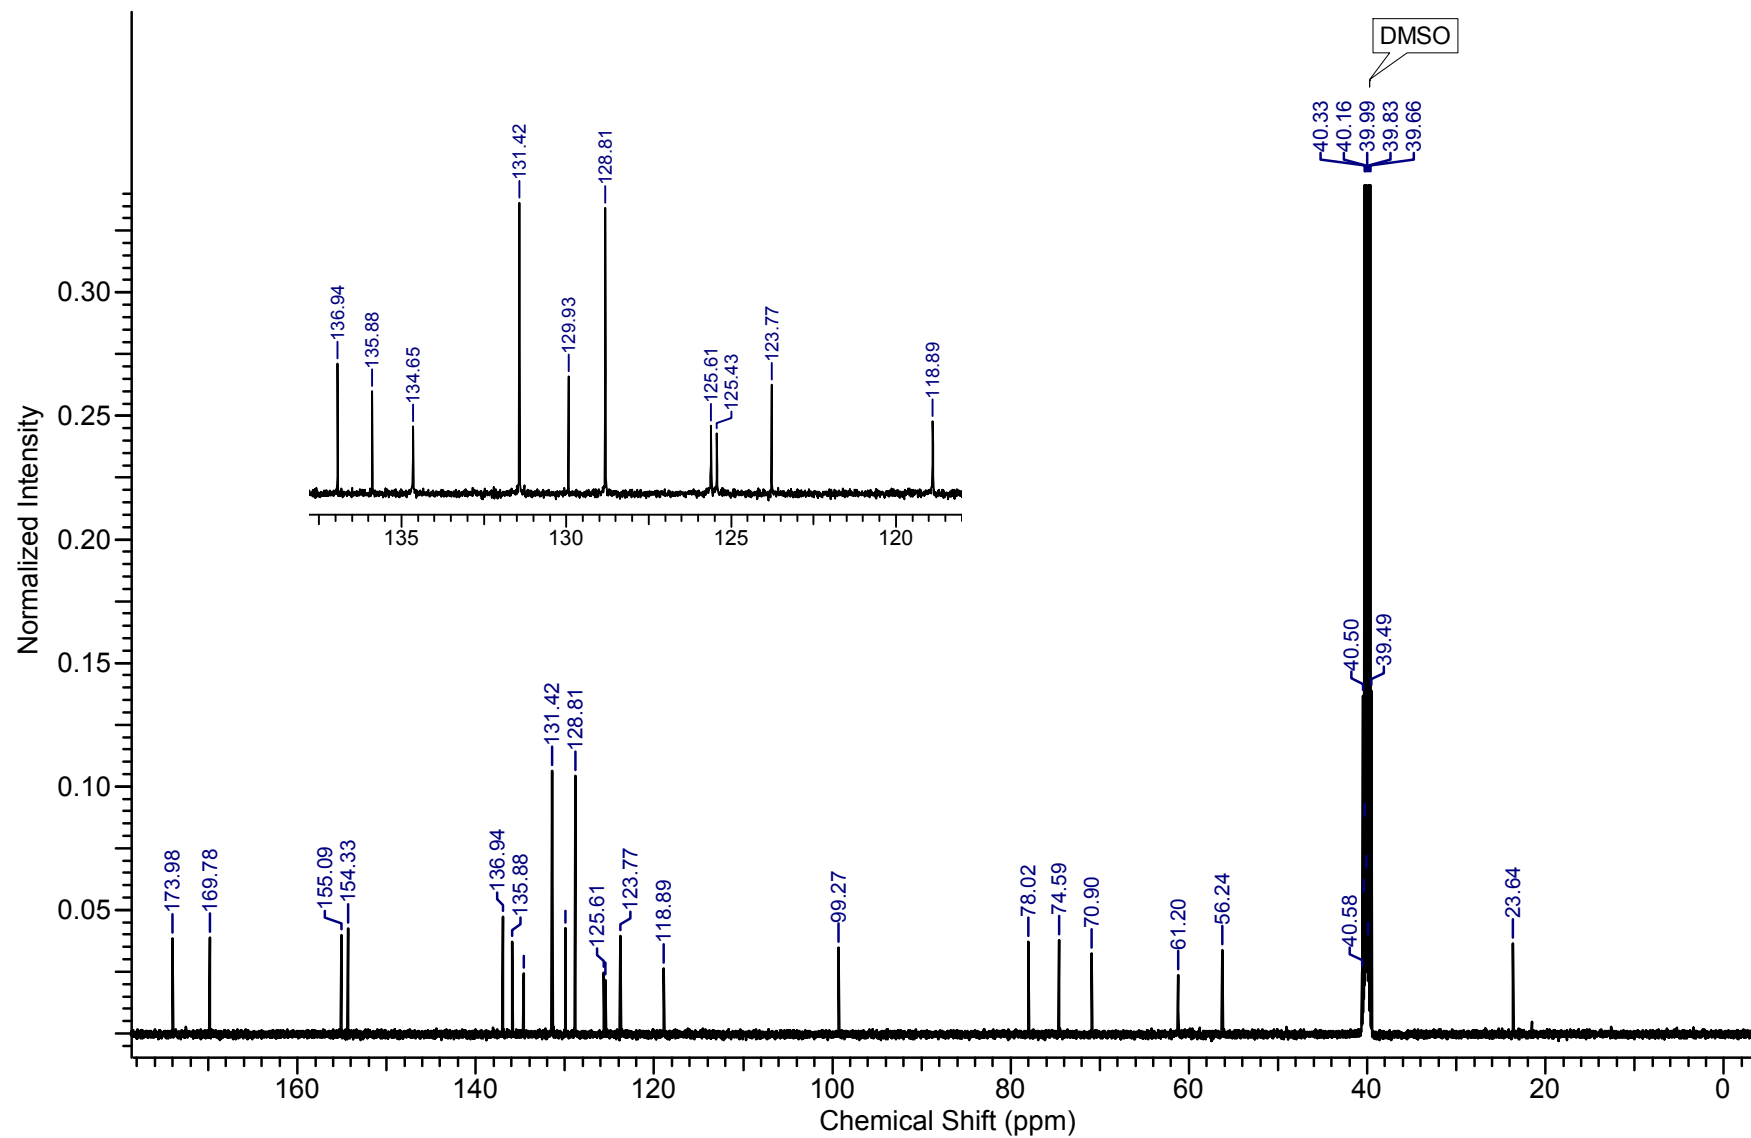

33.  $^1\text{H}$  NMR spectrum of **13<sub>a</sub>** (500 MHz,  $\text{DMSO-d}_6$ )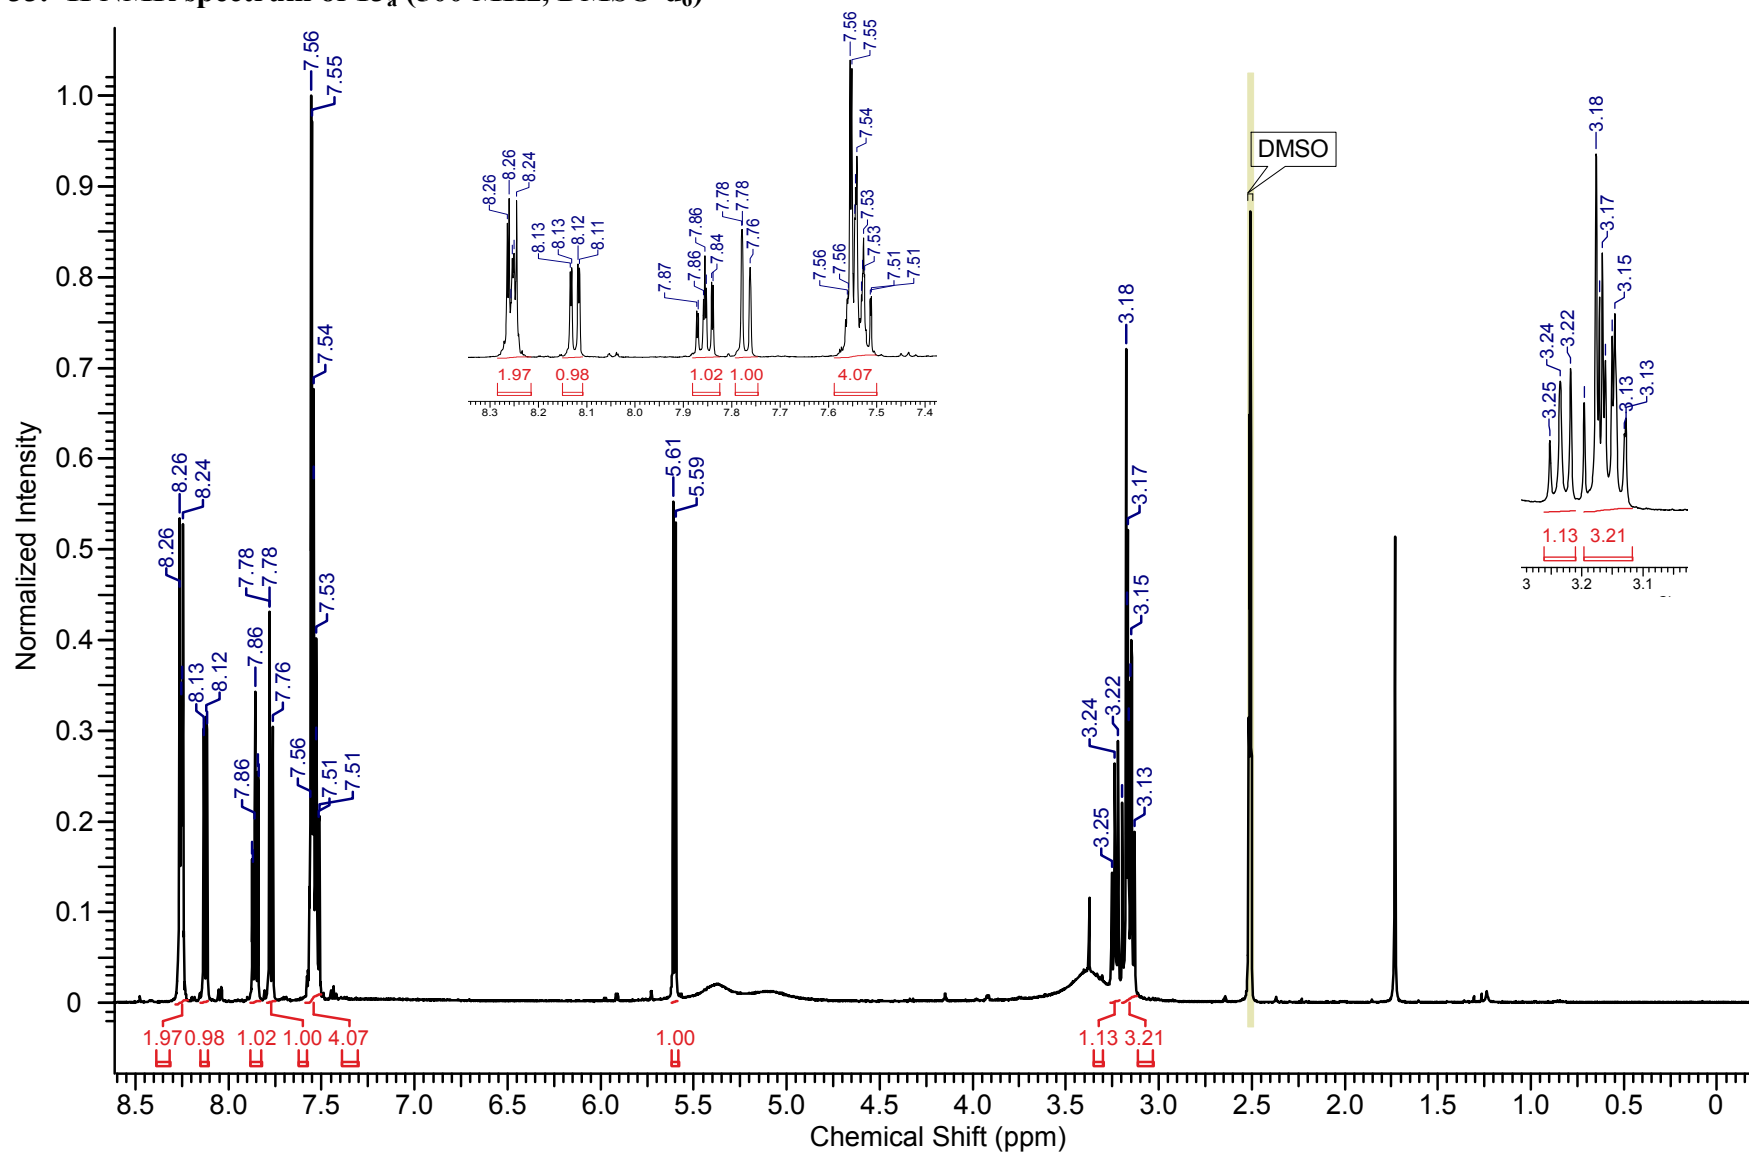

34.  $^{13}\text{C}$  NMR spectrum of  $13_a$  (125 MHz,  $\text{DMSO-d}_6$ )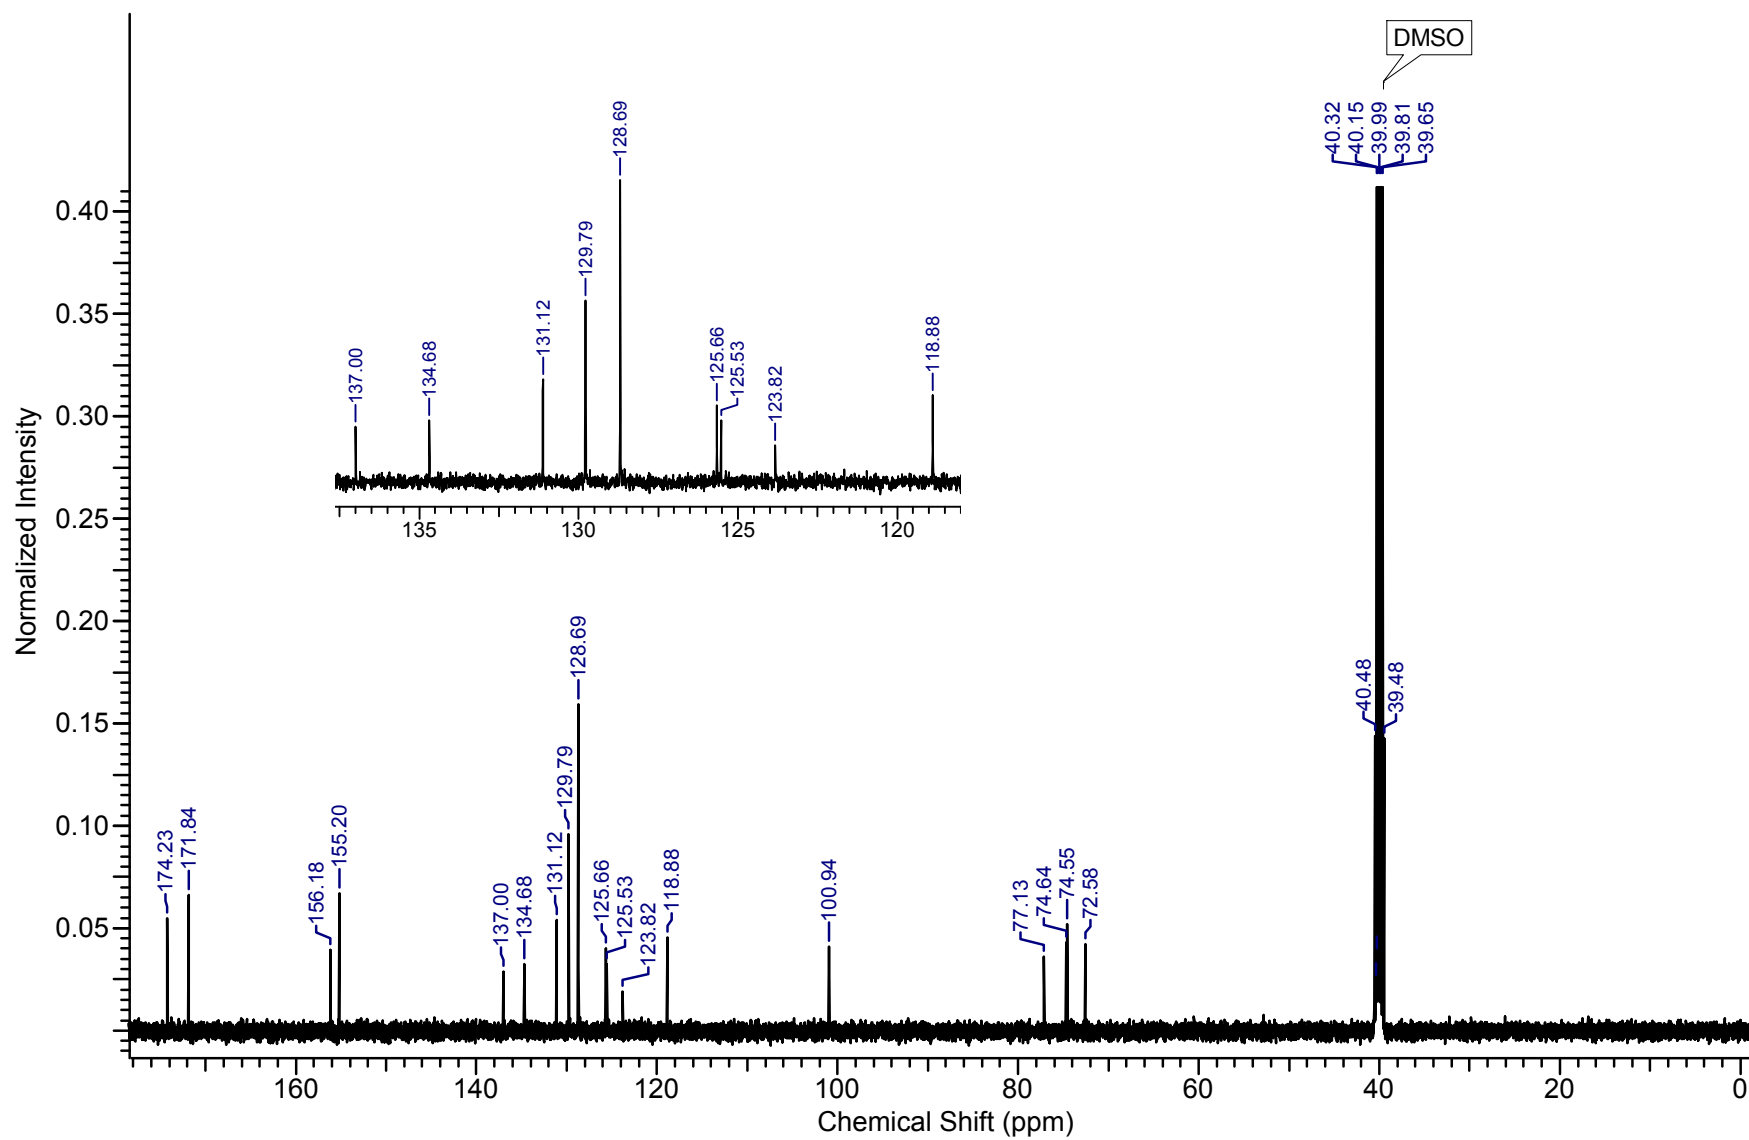

35.  $^1\text{H}$  NMR spectrum of  $13_b$  (500 MHz,  $\text{D}_2\text{O}$ )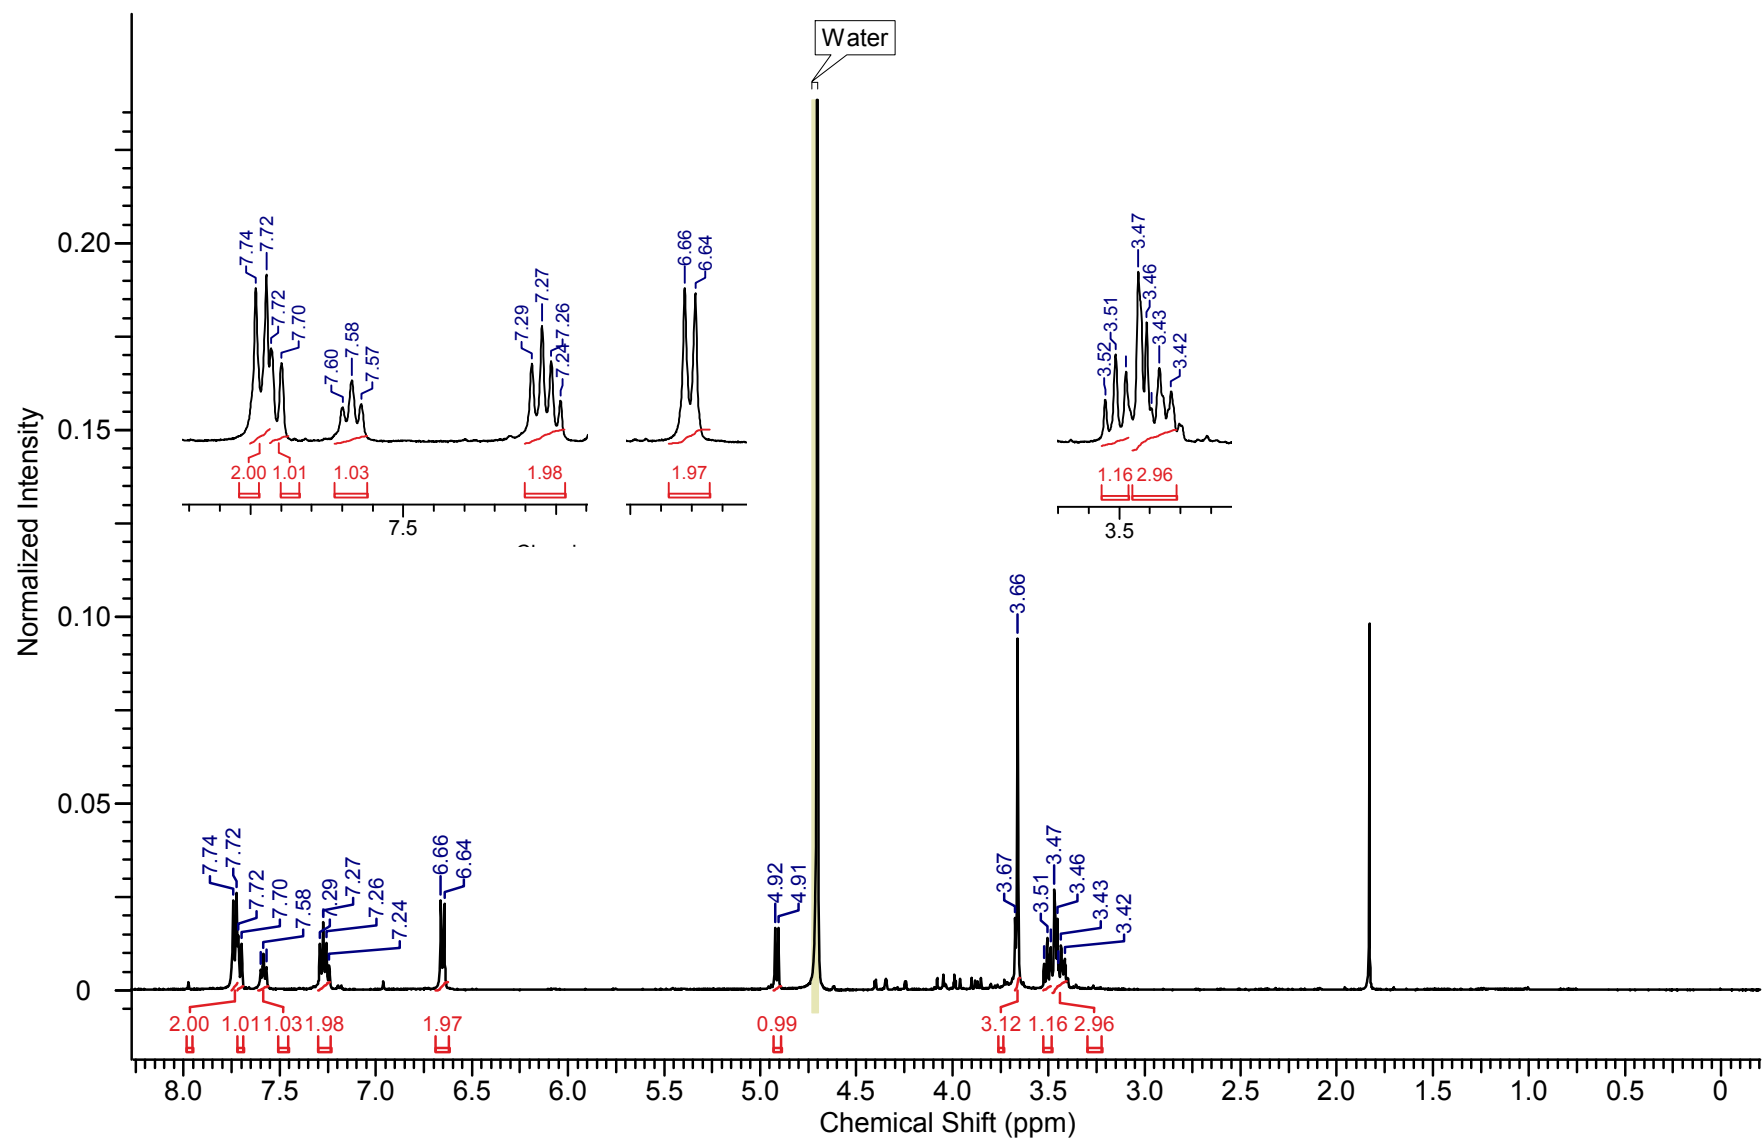



36.  $^{13}\text{C}$  NMR spectrum of  $13_b$  (125 MHz,  $\text{D}_2\text{O}$ )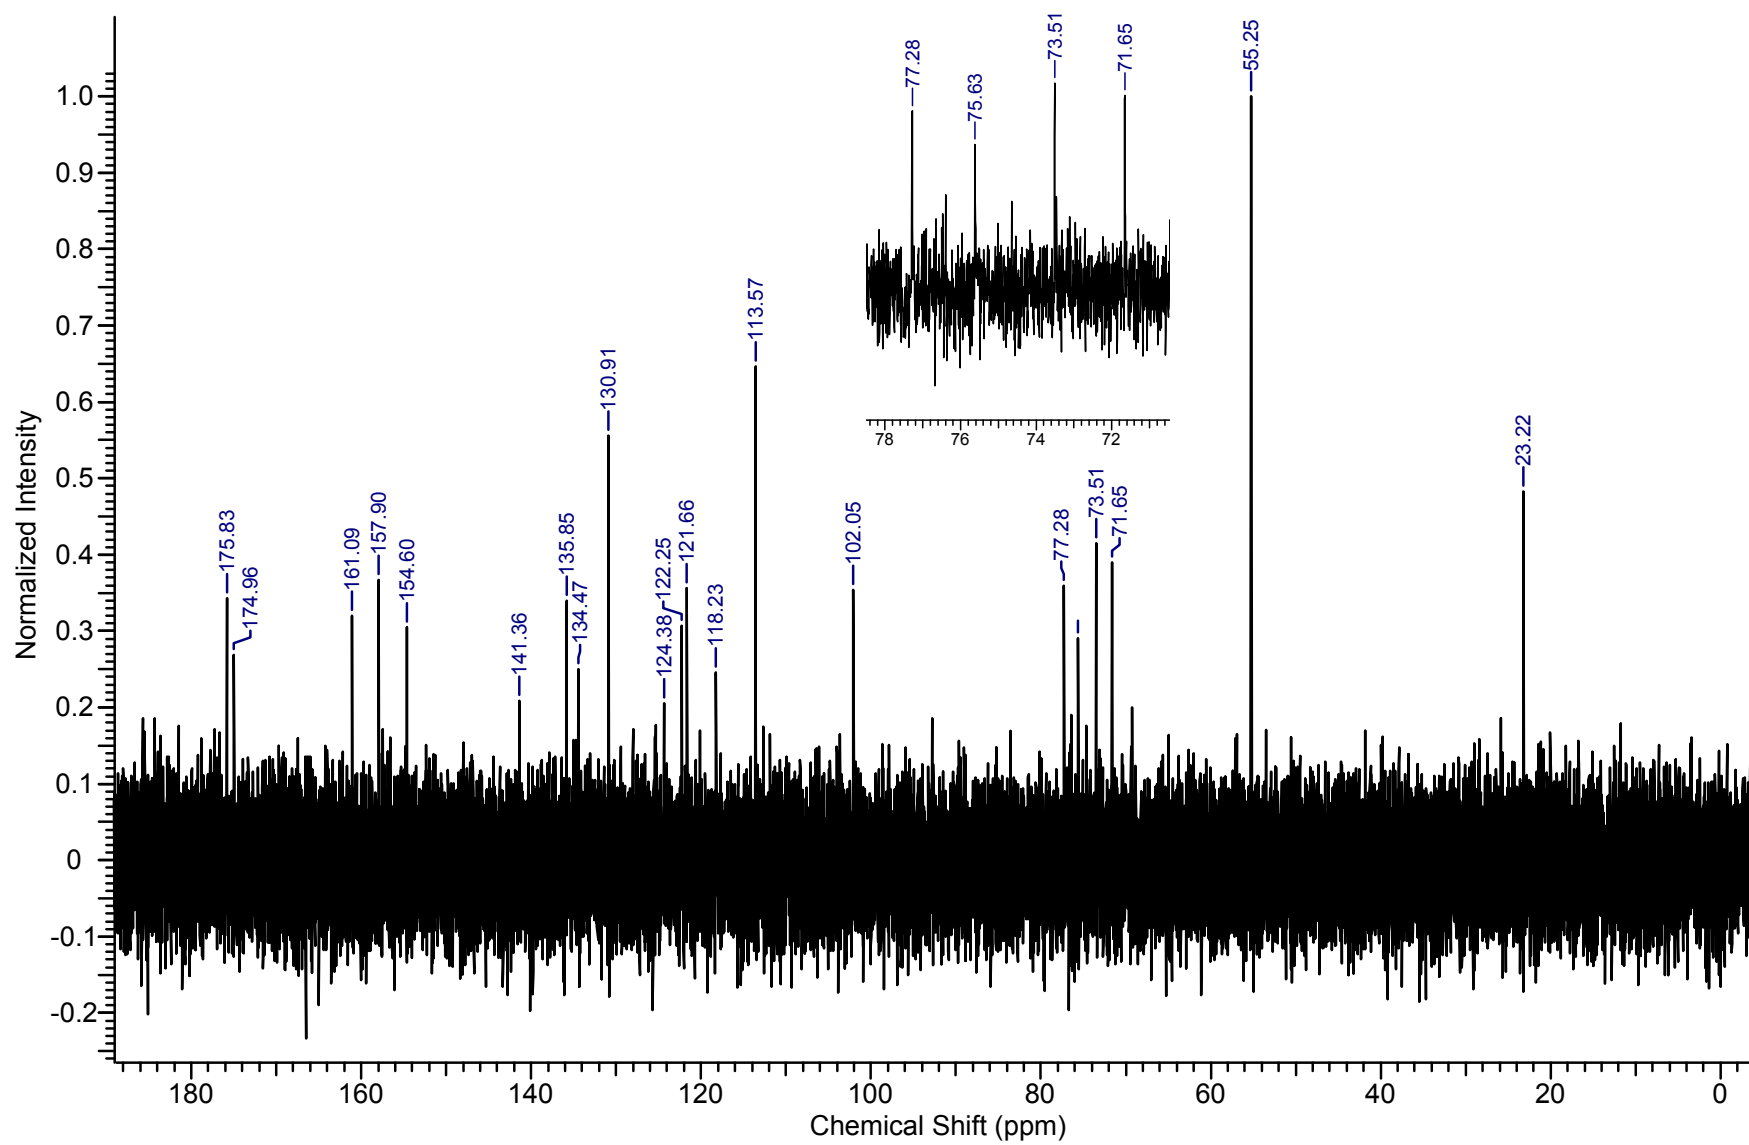

37.  $^1\text{H}$  NMR spectrum of  $13_e$  (500 MHz,  $\text{D}_2\text{O}$ )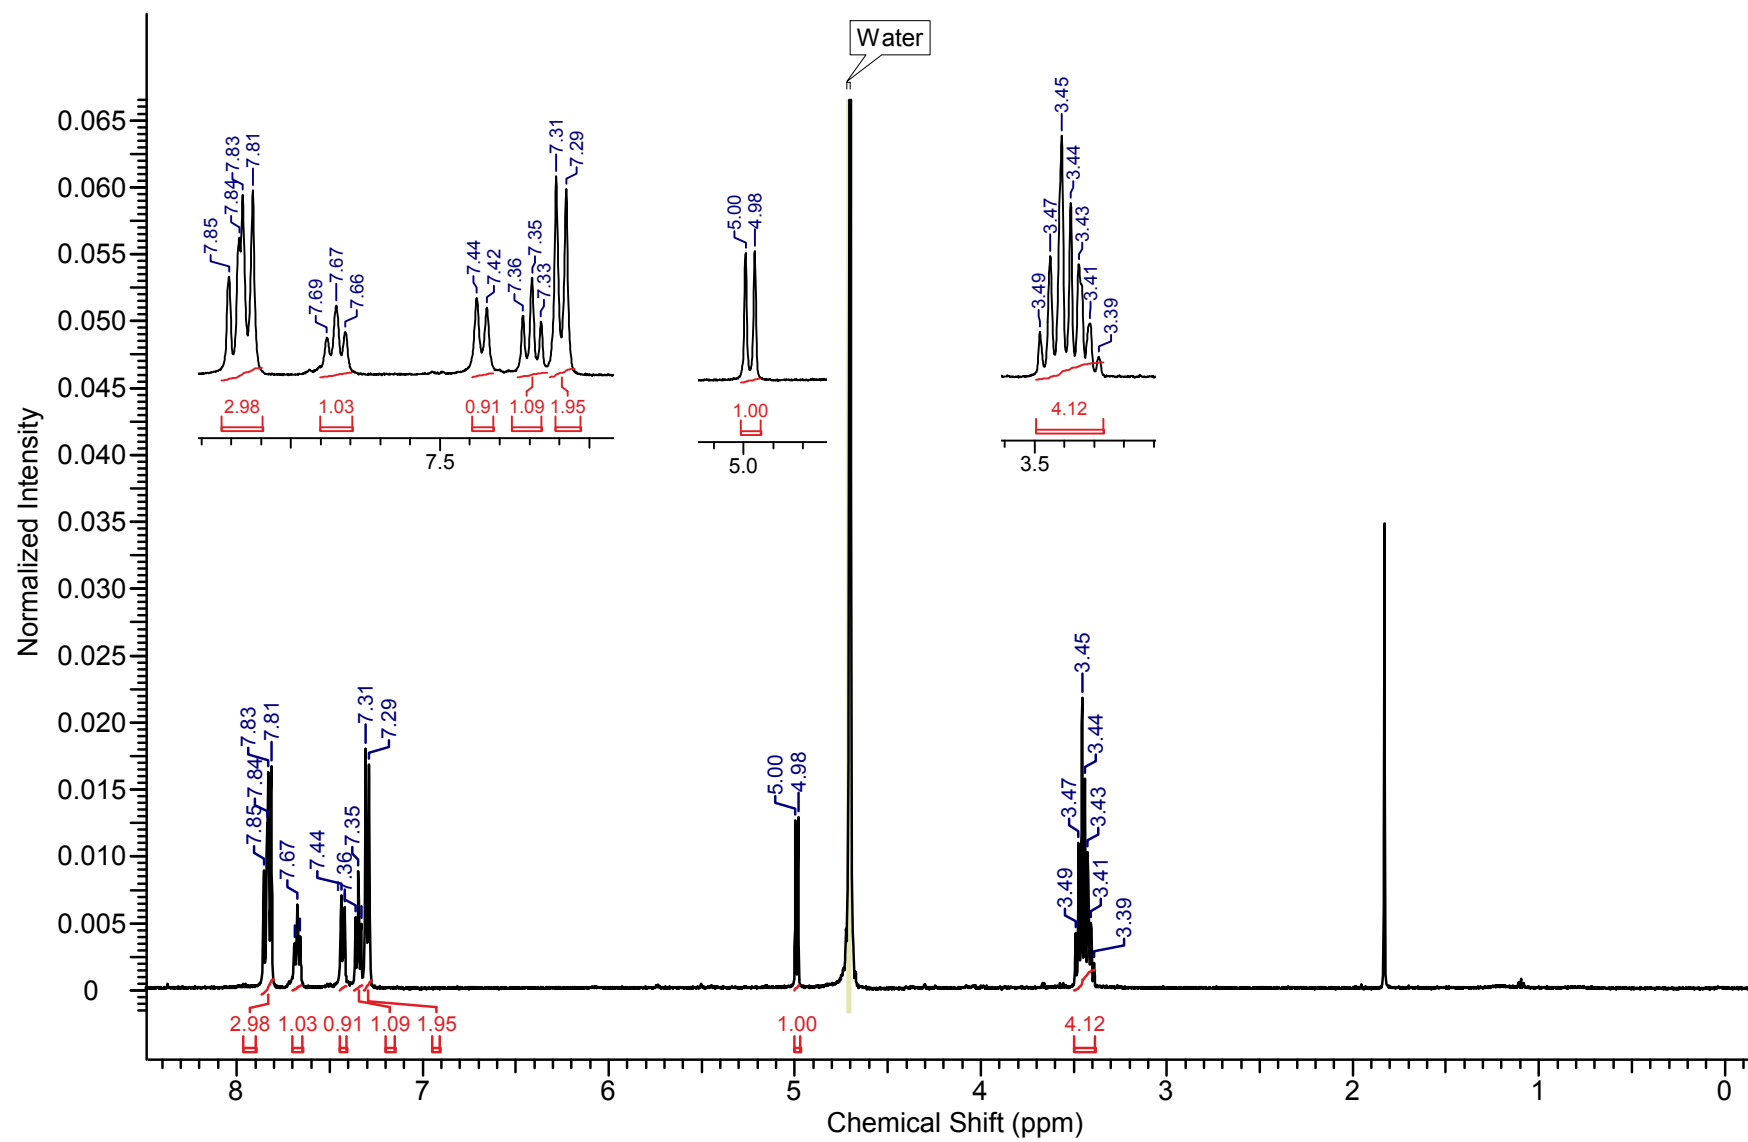

38.  $^{13}\text{C}$  NMR spectrum of  $13_e$  (125 MHz,  $\text{D}_2\text{O}$ )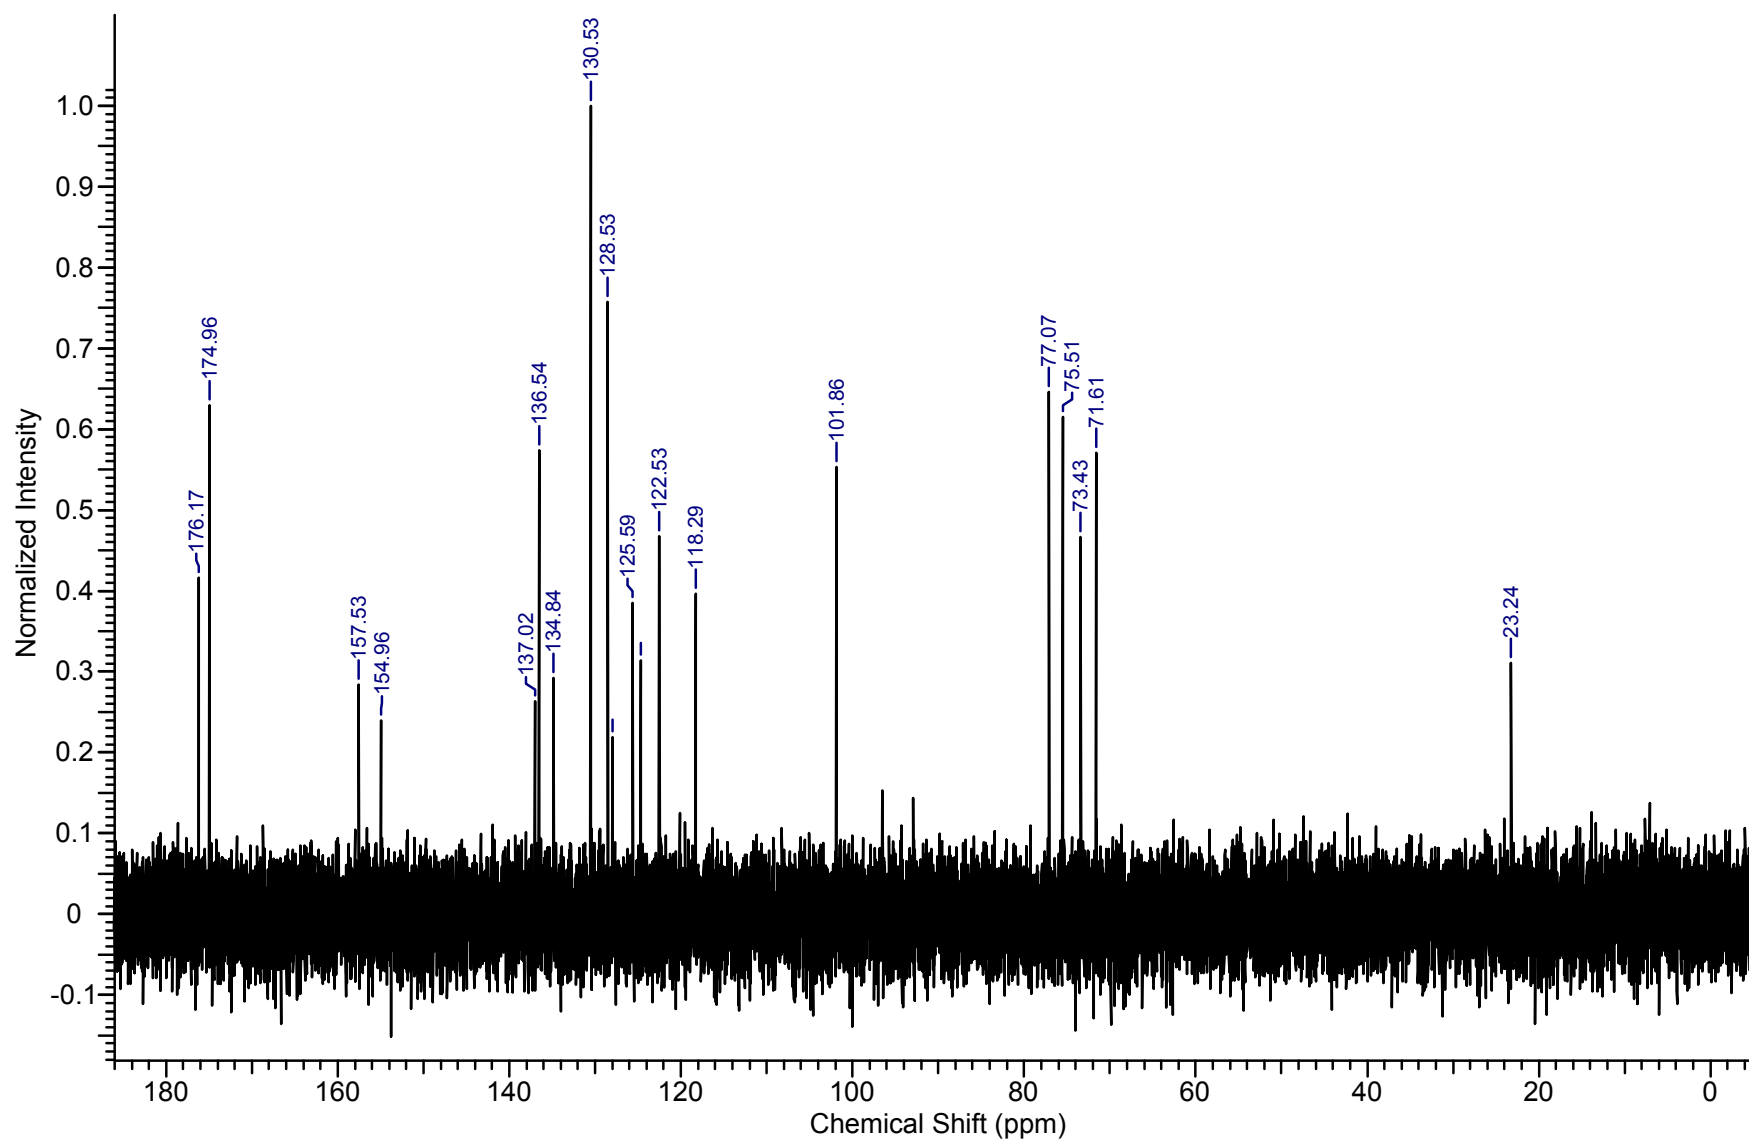

Supplement: d0ob01505a1.pdf [file d0ob01505a1.pdf]
